# 1 To freeze or to scoop? Dealing with the turbid waters of California's coastal 2 lagoons

3 Authors: Rachel Turba<sup>1\*</sup>, Glory Thai<sup>1</sup>, David Jacobs<sup>1</sup>

4

5 <sup>1</sup>Department of Ecology and Evolutionary Biology, University of California, Los Angeles,  
6 California 90095 USA

7 \*Corresponding author: [rturba@outlook.com](mailto:rturba@outlook.com)

## 8 Abstract

9 Coastal lagoons are an important habitat for endemic and threatened species in California that  
10 have suffered impacts from urbanization and increased drought. Environmental DNA has been  
11 promoted as a way to aid in the monitoring of biological communities, but much remains to be  
12 understood on the biases introduced by different protocols meant to overcome challenges  
13 presented by unique systems under study. Turbid water is one methodologic challenge to eDNA  
14 recovery in these systems as it quickly clogs filters, preventing timely processing of samples. We  
15 investigated biases in community composition produced by two solutions to overcome slow  
16 filtration due to turbidity: freezing of water prior to filtration (for storage purposes and long-term  
17 processing), and use of sediment (as opposed to water samples). Bias assessments of community  
18 composition in downstream eDNA analysis was conducted for two sets of primers, 12S (fish)  
19 and 16S (bacteria and archaea). Our results show that freezing water prior to filtration had no  
20 effects on community composition for either primer, even when using a filter of larger pore size  
21 (3  $\mu\text{m}$ ), and therefore it is a viable approach in this system for comparison of water borne fish,  
22 bacteria and archaea. However, the 16S primer showed significantly different community

23 composition in sediments compared to water samples, although still recovering eDNA of  
24 organisms from the water column. Sediment sample replicates were heterogeneous, and therefore  
25 increasing the number of replicates would be recommended for similar habitats.

## 26 Introduction

27 Coastal lagoons in California are the numerically dominant form of coastal wetland (Jacobs et  
28 al., 2011; Stein et al., 2014) and are important in many other Mediterranean climates and  
29 subtropical environments. These lagoons are characterized by seasonal and episodic breaching  
30 (opening of the lagoon to the sea, usually by stream flow) and closure (isolation of the lagoon by  
31 a high sandbar), which provide a suite of ecological services: from groundwater infiltration to  
32 support of unique biodiversity (Ballard et al., n.d.). This system serves as important habitat and  
33 nursery for endemic and endangered fishes and amphibians, such as the steelhead  
34 (*Oncorhynchus mykiss*), red-legged frog (*Rana aurora draytonii*), and the tidewater goby  
35 (*Eucyclogobius newberryi*) (Earl et al., 2010; Shaffer et al., 2004; Swift et al., 1993, 2016). Thus,  
36 California lagoons are spatially and temporally variable systems with unique biodiversity and  
37 biodiversity assessment challenges.

38 Coastal lagoons have been drastically reduced in numbers along the California coastline,  
39 driven mostly by the impact of coastal land use for transport structures, agriculture, and  
40 development. These are further exacerbated by ongoing changes in the hydrological cycles due  
41 to climate change (SCWRP, 2018). While these sites are critical for endangered species  
42 conservation, they are also subject to frequent invasion and their response to environmental  
43 variation is poorly documented. However, monitoring of this habitat can be limited by a variety  
44 of issues, ranging from limited human power and access to challenges driven by the natural  
45 complexity and dynamism of these lagoons.

46           The use of environmental DNA (eDNA) has been advocated as an alternative for  
47 monitoring communities and target species (Thomsen & Willerslev, 2015), and can overcome  
48 and complement certain field limitations from traditional methods (e.g. seining, trapping). On-  
49 site collection can be relatively fast, and therefore allow field workers to cover more ground. It  
50 can also recover the DNA signal of species that are rare, cryptic and/or hard to capture by  
51 traditional methods, and being non-intrusive, it offers an alternative when working with  
52 endangered species for which permits are necessary (Deiner et al., 2017; Dejean et al., 2012;  
53 Sard et al., 2019). In addition, metabarcoding approaches allow the investigation of multiple  
54 species from a single collection (Taberlet, Coissac, et al., 2012).

55           Nevertheless, it is important to recognize that this approach also brings its own  
56 limitations and biases (van der Loos & Nijland, 2021). In some circumstances, eDNA sampling  
57 can be more expensive than traditional, more established methods (Smart et al., 2016). Since  
58 there are no voucher specimens from collections, contamination is a major issue that needs to be  
59 addressed early on, following best practices in the field (Goldberg et al., 2016). The lack of  
60 voucher specimens also leads to an overdependence on the use of barcodes and genetic databases  
61 for taxonomic identification, which introduces another set of biases, from misidentification to  
62 lack of species representation (Taberlet, Coissac, et al., 2012). Other challenges arise from the  
63 non-universality of sampling methods and downstream processing, with the probability of  
64 detection varying depending on the species and their density, as well as the type of environment,  
65 which affects rates of DNA degradation (Deiner et al., 2015; Rees et al., 2014; Williams et al.,  
66 2017).

67           Coastal lagoons can vary in their environmental qualities quite drastically. One major  
68 challenge is the high and variable turbidity of the water. High turbidity usually occurs when

69 lagoons are closed to the ocean by a sandbar and driven by organic and inorganic matter. In this  
70 case, filtering water on-site becomes a problem. Filtration is a widespread method for handling  
71 water samples (Laramie et al., 2015; Tsuji et al., 2019). Set volumes of water are run through a  
72 small filter to concentrate DNA before extractions. However, high concentration of fine sediment  
73 or organic matter in water quickly obstructs filters, making the filtration process time-consuming  
74 (although it could actually aid recovery by binding DNA to suspended particles: Kumar et al.,  
75 2022; Liang & Keeley, 2013; Torti et al., 2015).

76 To overcome this issue, some stakeholders have relied on a tiered filtration step  
77 (prefiltration) to reduce particles and avoid clogging filters (Tsuji et al., 2019), but this approach  
78 increases costs, labor and opportunities for potential contamination (Li et al., 2018; Majaneva et  
79 al., 2018; Robson et al., 2016). The use of filters of bigger pore sizes, up to 20  $\mu\text{m}$ , has been  
80 previously tested and in cases of turbid waters is generally preferred, but requires filtering larger  
81 volumes of water to capture the same amount of DNA recovered in smaller pore size filters  
82 (Robson et al., 2016; Turner, Barnes, et al., 2014).

83 Freezing water for storage purposes prior to filtration can mitigate the issue of slow  
84 filtration in the field and allow it to be done in batches in the laboratory at a later time, but this  
85 type of sample storage might introduce bias on DNA capture and community composition  
86 (Kwambana et al., 2011; Sekar et al., 2009). Cells can disrupt and extrude their DNA in the  
87 environment, an issue that has been demonstrated in certain cases (e.g. Suomalainen et al., 2006),  
88 which would then make it easier for it to pass through the filter pores. In the case of turbid  
89 waters, increasing the pore size of filters to speed the filtration process could worsen this  
90 problem by letting DNA in solution flow through the pores more easily.

91           When dealing with turbid waters, some stakeholders have opted to use the centrifugation  
92 approach (e.g. Williams et al., 2017). Extracellular DNA (i.e. DNA not contained within a cell  
93 wall) can be bound to particles (Torti et al., 2015) and consequently be captured and detected  
94 more easily following centrifugation of particles into pellets. However, the amount of water used  
95 is limited by centrifuge size, usually around 15-30 mL per replicate (Doi et al., 2017; Ficetola et  
96 al., 2008), which might limit recovery of diluted DNA (Deiner et al., 2015).

97           Processing sediment samples may be preferable to processing highly turbid water  
98 samples. However, it is important to understand how DNA recovery from these different media  
99 compare to one another. Turner et al. (2015) and Perkins et al. (2014) have shown that sediment  
100 can have a higher concentration of fish eDNA and some bacteria, respectively. This could be  
101 related to the organic-particle binding and sinking properties, and a longer DNA persistence in  
102 sediment compared to water samples. However, as is the case with water samples, there is no  
103 consensus on the rate of degradation of eDNA in soil and sediment (Dell'Anno & Corinaldesi,  
104 2004; Levy-Booth et al., 2007; Torti et al., 2015), and this will depend on multiple local biotic  
105 and abiotic factors. In addition, biological communities will naturally differ between water  
106 column and sediments, even though we expect some level of overlap due to both DNA sinking  
107 and suspension.

108           Previous work have been done comparing different approaches to processing eDNA, such  
109 as filtration and storage methods (Hinlo et al., 2017; Takahara et al., 2015), including some work  
110 on turbid waters (Kumar et al., 2022; Robson et al., 2016; Williams et al., 2017), and  
111 comparisons between water and sediment eDNA recovery (Sales et al., 2019; Turner et al.,  
112 2015). But results have been contradictory, or limited to looking at just DNA concentration, or at  
113 a single targeted species.

114           The goal of the present study is to compare how freezing water prior to filtration and  
115 using water versus sediment samples induce and/or exacerbate biases in taxa detection for a set  
116 of universal primers targeting different biological communities—12S (fish) and 16S (bacteria and  
117 archaea)—in coastal lagoons. By understanding the biases introduced when processing  
118 environmental samples, we will be able to inform decisions regarding experimental design for  
119 monitoring such a dynamic and challenging habitat, which has invaluable importance for the  
120 maintenance of ecosystem services for both wild and urban populations. We expect these results  
121 will be of interest relative to eDNA sampling in other aquatic systems as well.

## 122   Material and Methods

### 123           Site - Topanga Lagoon

124 To determine the variability of species detection for each protocol, water and sediment samples  
125 were collected from a south-facing coastal lagoon in southern California, located in Malibu, a  
126 stretch of coast that runs from Santa Monica to Point Mugu. This lagoon is part of the Topanga  
127 State Park and is currently undergoing plannings for restoration. It is the only lagoon on this  
128 stretch of coast that still harbors a stable population of tidewater goby (*E. newberryi*), a federally  
129 endangered species, and is relatively less impacted than other lagoons in the same region. The  
130 endangered southern steelhead trout (*O. mykiss*) is also found in this system during anadromy  
131 when the lagoon is breached. Due to the presence of these species, Topanga lagoon has been  
132 periodically surveyed by the Jacobs' lab members and collaborators such as researchers at the  
133 Resource Conservation District of The Santa Monica Mountains (RCDSMM), and therefore its  
134 macrobiota is regularly studied, especially the fish fauna. The lagoon was sampled on September  
135 6th, 2018, at the end of the Summer season, and as is typical of this time of the year, the weather  
136 was dry with no record of precipitation since June (WeatherSpark.com, n.d.). The lagoon was

137 closed to the ocean by a sandbar and the water was murky (Fig. 1), which in the author's  
138 experience, such turbidity slowed filtration and easily clogged 0.45  $\mu\text{m}$  cellulose nitrate filters.

### 139 Protocols and samples

140 A sterilized water jug was used to collect a single water sample in the lagoon, at a mid-point  
141 between the mouth margin and the road bridge (Fig. 1). The sample was then placed on ice and  
142 brought to the laboratory (~1 hr car ride). This method of “grab-and-hold” has proven to be  
143 similarly effective as on-site filtration in a previous study (Pilliod et al., 2013). Once in the  
144 laboratory, the total volume was divided in three batches for each treatment: (i) centrifugation  
145 followed by filtration of supernatant (5 replicates of 50 mL falcon tube) (Doi et al., 2017); (ii)  
146 pre-freezing followed by double filtration (5 replicates of 500 mL Nalgene bottles) (Turner,  
147 Miller, et al., 2014); and (iii) no freezing followed by double filtration on the same day of  
148 collection (5 replicates of 500 mL Nalgene bottles) (Turner, Miller, et al., 2014).

149 For the pre-freezing protocol, water bottles were frozen at  $-20\text{ }^{\circ}\text{C}$  for 3 days before  
150 thawing for filtration. Double filtration for both pre-freezing and no-freezing treatments was  
151 done through cellulose nitrate filters, firstly on a 3  $\mu\text{m}$  pore size filter, then followed by a 0.45  
152  $\mu\text{m}$  pore size using an adapted vacuum pump in the pre-PCR room of the laboratory (Fig. S1).  
153 The centrifugation protocol also included a second stage filtration of the supernatant using a 0.45  
154  $\mu\text{m}$  pore size filter. Here, we will focus only on the results from the first filtration step of the  
155 water filtration protocol. More details on that are explained further in the supplemental material.

156 Surficial sediment was collected in triplicates at the same location where water was  
157 sampled (5 replicates of triplicate 2 mL cryotubes, 15 tubes total), following instructions as  
158 defined by the CALeDNA program (<https://ucedna.com/methods-for-researchers>). These were  
159 also kept on ice during field work and stored in a  $-80\text{ }^{\circ}\text{C}$  freezer upon arrival at the laboratory

160 until DNA extractions. Results from sediment samples were compared against both filtration  
161 protocols: (1) pre-freezing followed by filtration; (2) no freezing followed by filtration.

#### 162 DNA Extraction

163 DNA from sediments and filters were extracted following the PowerSoil extraction protocol.  
164 Filters were chopped into thin strips before being added to the bead tubes, and sediment  
165 triplicates were pooled in small batches to reach 0.25-0.3 g before processing. We used the soil  
166 extraction kit on the filters as well to reduce potential PCR inhibition caused by the water  
167 turbidity (Kumar et al., 2022), but also to limit the number of variables in the research design by  
168 adding another extraction protocol.

#### 169 Contamination best practices

170 Care was taken to avoid contamination both in the field and the lab. Before collection, bottles  
171 and water jug were cleaned and bleached and then handled with clean gloves on site. Extractions  
172 and PCR were done in a separate pre-PCR room. Utensils and bench top were cleaned with 10%  
173 bleach, followed by 70% ethanol. Forceps and scissors for handling filters were seared and  
174 cleaned with bleach and ethanol after dealing with each sample. PCR reagents were prepared in a  
175 clean, PCR-free, positive pressure hood. Sediment samples were collected with new 2 mL  
176 cryotubes and following field protocol as recommended by the CALeDNA program. Blanks  
177 were made for the field collection, laboratory filtration and PCR (5 blanks in total) and included  
178 in the library for sequencing.

#### 179 Sequencing

180 Library preparation followed CALeDNA protocols ([https://ucedna.com/methods-for-](https://ucedna.com/methods-for-researchers)  
181 [researchers](https://ucedna.com/methods-for-researchers)). Metabarcoding libraries were generated for bacteria and archaea (16S rRNA), fish  
182 (12S rRNA) and metazoans (CO1). Sequences for each primer can be found at Table 1. All



183 libraries consisted of triplicate PCR reactions. PCR products were visualized using gel  
184 electrophoresis, and for each barcode, PCR triplicates were pooled by sample. After bead  
185 cleaning, all markers were pooled by sample and tagged for sequencing (single indexing).  
186 Libraries were pooled and run on a MiSeq SBS Sequencing v3 in a pair-end 2x300 bp format  
187 [Technology Center for Genomics & Bioinformatics (TCGB), UCLA] with a target sequencing  
188 depth of 25,000 reads/sample/metabarcodes. Two sequencing runs were conducted, but the CO1  
189 primer was still below the sequencing depth threshold and therefore its results will not be  
190 discussed here (see Figs. S2-3). For each run, our library was pooled with different samples from  
191 different collaborators to maximize efficiency of the sequencing run.

#### 192 Bioinformatics and data pre-processing

193 Sequence data was bioinformatically processed in Hoffman2, the High Performance Computing  
194 cluster at UC Los Angeles, using the Anacapa Toolkit (Curd, Gomer, et al., 2018) with default  
195 settings. Briefly, reads are demultiplexed and trimmed for adapters (cutadapt, Martin, 2013) and  
196 low-quality reads (FastX Toolkit, *FASTX-Toolkit*, n.d.). Dada2 (Callahan et al., 2016) is used to  
197 denoise, dereplicate, merge and remove chimeras, and the resulting clean Amplicon Sequence  
198 Variants (ASVs) have their taxonomy assigned using Bowtie2 (Langmead & Salzberg, 2012),  
199 matched to a custom reference library (CRUX, Curd, Kandlikar, et al., 2018). Confidence levels  
200 are determined by the BLCA algorithm (Gao et al., 2017) to generate a table of best taxonomic  
201 hits, from super-kingdom to species level. The pipeline was designed to process not only paired,  
202 but also unmerged and unpaired reads.

203 Taxonomic tables with a bootstrap confidence cutoff score of 0.6 were used for  
204 downstream analyses. Except when noted, all bioinformatic analyses mentioned beyond this  
205 point were performed using R v.3.6.2 (R Core Team, 2018) in RStudio v.1.2.1335 (RStudio

206 Team, 2020). Decontamination was done separately for each primer set and each run (since the  
207 dataset was pooled with different combinations of samples for sequencing). We used the package  
208 metabar (Zinger et al., 2020) to lower tag-jumping and remove contaminants through detection  
209 of ASVs whose relative abundance is highest in negative controls. We also ran a modification of  
210 the gruinard pipeline ([https://github.com/zjgold/gruinard\\_decon](https://github.com/zjgold/gruinard_decon)), including only steps 4 (site  
211 occupancy modeling) and 5 (dissimilarity between replicates), since previous steps were  
212 redundant with the metabar decontamination steps. Lastly, taxa classified as "Not\_found",  
213 "Unclassified", "*Canis lupus*", "*Bos taurus*", and "*Homo sapiens*" were removed from the final  
214 tables before being merged and used in downstream analyses.

#### 215 Diversity analysis

216 We used the laboratory's own sampling record and the Global Biodiversity Information Facility  
217 database (Gbif.Org, 2022) to manually check the 12S primer final taxonomic table. The number  
218 of species captured by each treatment was visualized using Venn Diagrams (package  
219 VennDiagram, Chen, 2018). Species rarefaction curves were made for each metabarcode to  
220 inspect the level of species saturation for each protocol replicate. The slope of each curve was  
221 calculated using the rareslope function in the vegan package (Oksanen et al., 2019), and the  
222 confidence interval for each protocol was calculated using pairwiseCI (Schaarschmidt &  
223 Gerhard, 2019) with confidence level at 95%. Rarefaction curves were plotted using the ggrare  
224 function from the ranacapa package (using step = 5).

#### 225 Differential abundance

226 The raw dataset was analyzed using DESeq2 to look at differential abundance between protocols  
227 (Love et al., 2014). The default testing framework was used (test = "Wald", fitType =  
228 "parametric"), which includes the Benjamini-Hochberg multiple inference correction. The

229 sfType option was defined as poscounts since this estimator is able to handle zeros. The log<sub>2</sub>  
230 fold change of each pairwise comparison for which there were significant differences in  
231 abundances was plotted.

### 232 Beta diversity

233 For the beta diversity analysis, samples were standardized by using either the eDNA index  
234 (Kelly et al., 2019) or by rarefying them as a way to equalize sequencing effort and minimize  
235 stochasticity and bias. For the eDNA index, we followed the Wisconsin double standardization  
236 method in the vegan package. The custom\_rarefaction function in the R package ranacapa  
237 (Kandlikar, 2020) was used to rarefy the dataset with 10 replicates.

238 For the 12S primer, samples were rarefied to 20 000 reads. Three sediment samples were  
239 excluded due to very low read numbers (<100). For the 16S, samples were rarefied to 15 000 and  
240 one sediment sample that had ~5000 reads was excluded. The number of reads per taxa for each  
241 protocol replicate was plotted using the phyloseq package (McMurdie & Holmes, 2013), for both  
242 the raw and rarefied dataset.

243 The rarefied dataset followed a Constrained Analysis of Principal Coordinates (CAP)  
244 using the capscale function in vegan and Bray-Curtis distance. This ordination method, which  
245 can be used with non-Euclidean dissimilarity indices, explains the ordination of assemblage  
246 composition based on species abundances. The difference in community composition for each  
247 treatment was then analyzed using a PERMANOVA and Bray-Curtis dissimilarity, followed by a  
248 pairwise PERMANOVA comparison (all with the vegan package). P-values were adjusted using  
249 the FDR (False Discovery Rate) approach.

## 250 Results

### 251 Sequencing

252 The first run generated a total of 6 407 371 reads: 3 817 216 reads for the 12S primer, 2 393 627  
253 for 16S, and 196 528 for CO1. In the second run there were a total of 9 088 496 reads: 6 685 673  
254 reads for the 12S metabarcode, 1 904 283 reads for 16S and 498 540 for the CO1. For the 12S  
255 and 16S primers, we were able to reach our threshold of 25 000 reads/sample in most cases,  
256 while that was not the case for all except one sample of the CO1 primer. Because of this  
257 limitation on the number of reads/sample, the CO1 metabarcode will not be discussed further in  
258 the main paper (but check the supplemental material for more details).

### 259 Bioinformatics and data pre-processing

260 The number of reads per sample after decontamination and combining both runs is illustrated in  
261 Figure S3. We manually checked the final taxonomic tables of each separate run for the 12S  
262 primer to look for signs of contamination and evaluate how well the bioinformatic  
263 decontamination steps worked (metabaR and gruinard). The taxonomic tables for the 12S primer  
264 have substantially less species than the 16S, and the local fish fauna is relatively well known,  
265 making the process more tractable.

266 For the run that was pooled with samples from Palmyra Atoll, the output still retained  
267 some tropical reef and pelagic fish and elasmobranch species that are not found in coastal  
268 lagoons in California. We can expect that tag-jumping contamination is also present in the other  
269 sequencing runs and primers as well. Interestingly, eight out of 28 of those tropical species (ca.  
270 28%) were found exclusively on the sediment samples and not the water samples (e.g.  
271 *Acanthurus achilles*, *Scarus altipinnis*, *Lutjanus russellii*).

272 Barplots for both the raw and rarefied dataset (Figs. S3-4, respectively) show that  
273 sediment replicates had greater variability amongst themselves, both in number of reads and  
274 community composition, compared to the replicates of either water protocols. Water replicates  
275 were more consistent within and between protocols, and had an overall higher number of reads  
276 than the sediment samples.

## 277 Diversity

278 After the decontamination steps (metabaR and gruinard) and removing specific, uninformative  
279 ASVs (as listed above), the total number of species assigned to 12S was 39, distributed in 20  
280 orders and 22 families. Of these 39 species, only four had been previously recorded for the site  
281 (Table S1). For 16S, the total number of taxa assigned to species was 2 625, distributed in 45  
282 phyla and 335 families.

283 We have also noticed some dubious taxonomic assignments. For example, for the 12S  
284 primer, we had one hit for *Fundulus diaphanus*, which is a species of killifish native to the  
285 northeast of North America. However, the californian species *F. parvipinnis* has been previously  
286 documented in Topanga by lab members sampling at the site. Similarly, there were two hits for  
287 *Phoxinus phoxinus*, which has a European distribution with a closely related North American  
288 counterpart, *P. eos*, although this species has not been identified in collections from Topanga  
289 lagoon. Another dubious identification occurred for two species of *Odontesthes*, *O. incisa* and *O.*  
290 *smitti*, which were among the most abundant hits in our dataset but are native to the southwest  
291 Atlantic. These two species, however, are relatives of topsmelt (*Atherinops affinis*), commonly  
292 found in coastal lagoons and estuaries in California (Table S1).

293 The Venn Diagram (Fig. 2) shows that even though sediment samples had lower numbers  
294 of reads overall (Figs. S2-3), they had the highest number of species recovered (12S primer:

295 N=27, 19 unique; 16S primer: N=1 929, 1 178 unique). The species overlap between protocols  
296 for the 12S was only 1.2% (n=1), and for the 16S primer it was 3.5% (n=402).

297 Species rarefaction curves also show that sediment samples are further from reaching  
298 saturation compared to water samples, both for 12S and 16S primers (Fig. 3), although there was  
299 more variation between the replicates for the 12S sediment samples. For 12S primer, there is a  
300 significant difference in the slope of the species curves between the sediment and no freezing  
301 protocols (Fig. 4), while for 16S, all pairwise comparisons between protocols showed significant  
302 differences.

### 303 Differential Abundance

304 For the 12S primer, there was no significant difference between species abundance for any of the  
305 protocols' pairwise comparisons. For the 16S primer, there was no significant difference in  
306 comparison between the water protocols (pre- and no freezing). However, there were significant  
307 differences in the pairwise comparisons of water samples and sediment samples (Fig. 5, Tables  
308 S2-3). The top five differentially abundant species in the water protocols were representatives of  
309 the families Aphanizomenonaceae, Comamonadaceae and Flavobacteriaceae (in both pre- and no  
310 freezing); plus Hemiselmidaceae and Geminigeraceae (pre-freezing protocol only). These  
311 comprise groups of cyanobacteria (Aphanizomenonaceae) and algae (Hemiselmidaceae and  
312 Geminigeraceae), as well as environmental bacteria (Comamonadaceae and Flavobacteriaceae).

313 The most differentially abundant species found in the sediment were representatives of  
314 the families Catenulaceae, Fragilariaceae and an archaea assigned to the Thaumarchaeota  
315 phylum (both pre- and no freezing); plus Woeseiaceae and Elphidiidae (no freezing protocol  
316 only); and Anaerolineaceae and Desulfobacteraceae (pre-freezing protocol only). These comprise  
317 groups of diatoms (Catenulaceae and Fragilariaceae), environmental bacteria (Woeseiaceae,

318 Anaerolineaceae and Desulfobacteraceae) and archaea (Thaumarchaeota), and foraminiferans  
319 (Elphidiidae).

### 320 Beta diversity

321 When using the eDNA index, the CAP analysis for the 12S primer showed that many of the  
322 species driving the differences in assemblage composition were the tropical species that are  
323 coming from the tag-jumping contamination (Fig. S6). For example, we see overrepresentation  
324 in the sediment samples of *Stegastes nigricans* and *Caranx melampygus*; and in the no freezing  
325 water samples, *Sphyræna barracuda*. Nevertheless, we also see some other species that are  
326 known to be found in the lagoon, such as the *Eucyclogobius newberryi*, being mostly  
327 overrepresented in the water samples compared to the sediments; and *Gila orcutii*,  
328 overrepresented in the no freezing protocol. Two species of dubious taxonomic assignment are  
329 also overrepresented in the sediment: *Phoxinus phoxinus* (as discussed in the previous  
330 ‘Diversity’ section); and *Acanthogobius flavimanus*, which is a species of goby native to Asia,  
331 but that has been recorded previously in California estuaries (Nico et al., 2022). The  
332 PERMANOVA results were not significant ( $p = 0.067$ ).

333 For the rarefied dataset, the CAP analysis was not able to recover any differences in  
334 assemblage composition for the 12S primer for any of the protocols (Fig. S5). One sediment  
335 replicate is driving most of the difference (CAP1=86%) with the overrepresentation of many  
336 tropical species, likely tag-jump contaminants. The PERMANOVA results were at the threshold  
337 of significance ( $p = 0.05$ ), but the pairwise test was not significant for any protocol comparison  
338 (Table 2). The lack of significant differences between water and sediment samples could have  
339 been driven by the loss of three sediment replicates when rarefying the dataset.

340 For the rarefied 16S primer dataset, the different protocols showed significant differences  
341 in assemblage composition. The first axis explains most of the total variation (CAP1=86%), with  
342 the tidewater goby being the most underrepresented in the sediment compared to the water  
343 samples, especially in the no freezing protocol (Fig. 6). Sediment samples were also slightly  
344 overrepresented by a few other species compared to water samples. One of them was identified  
345 as *Candidatus Nitrosopelagicus brevis*, which is a species of ammonia-oxidizing archaea  
346 (Thaumarchaeota) found mainly in the epi- and upper mesopelagic environments of the open  
347 oceans (Santoro et al., 2015). There are also two species of *Monomorphina*, (*M. pyrum* and *M.*  
348 *pseudonordstedti*) that belong to the Euglenaceae family, a group of eukaryotic flagellates found  
349 in freshwater environments. Lastly, there is *Elphidium williamsoni*, a foraminifera belonging to  
350 the family Elphidiidae found in tidal flats of the North Sea. CAP2 is representing the remaining  
351 variation (14%) found between the water protocols, with the most distinguishing species being  
352 the *Guillardia theta*, a species of flagellate algae belonging to the family Geminigeraceae,  
353 overrepresented in the pre-freezing protocol. The PERMANOVA result was significant for the  
354 16S primer ( $p = 0.001$ ), as well as for all the pairwise comparisons (Table 2).

355 The species represented in the rarefied dataset differ from the ones found when using the  
356 eDNA index for the 16S primer. Most of the community assemblage difference (CAP1=85%) is  
357 driven by differences between water and sediment samples, with six species being  
358 underrepresented in the latter: *Burkholderiales bacterium* TP637, *Curvibacter* sp. UKPF8, beta  
359 proteobacterium Mzo1, *Diaphorobacter ruginosibacter*, *Stella humosa* and *Verminephrobacter*  
360 *aporrectodeae*. All of them, with the exception of the last one, *V.aporrectodeae*, were also  
361 found as significantly different in the DeSeq2 analysis. The PERMANOVA result was also  
362 significant in this case ( $p = 0.001$ ), as well as for all the pairwise comparisons (Table 3).



## 363 Discussion

364 Standardized protocols to process eDNA are under development (e.g. Bohmann et al., 2021), but  
365 to implement these efficiently it is necessary to compare biases in taxa detection associated with  
366 different protocols. Here, we have explored the detection biases in community composition  
367 introduced by freezing water samples prior to filtration (for storage purposes), and the use of  
368 sediment samples as an alternative to sampling turbid waters. We find that pre-freezing water  
369 does not affect the recovery of community composition either for the 12S and 16S primers,  
370 compared to the no freezing protocol. This is the case even when filters of larger pore size (3  
371  $\mu\text{m}$ ) are used. Sediment samples recovered eDNA from organisms that inhabit the water column,  
372 however, due to high variability among replicates in read abundance, we suggest increasing the  
373 number of biological replicates in the field.

### 374 Tag-jumping contamination

375 Contamination concerns are usually centered around pre-sequencing, during the field and wet  
376 laboratory work. These are of fundamental importance and care should be taken by sterilizing  
377 equipment and using negative controls. However, previous literature shows that the sequencing  
378 phase can be another source of contamination, generating up to 10% of contaminated reads by  
379 tag-jumping (Larsson et al., 2018; Schnell et al., 2015), which can skew analyses of taxa  
380 abundance and composition towards the rare taxa. There are ways to help minimize this issue by  
381 making use of dual indexing (Kircher et al., 2012)—although see Caroe and Bohmann (2020) for  
382 a library approach without dual indexing—, and amplification positive controls. The latter can be  
383 used to track the rate and level of contamination after sequencing to guide read cutoffs on  
384 samples (Deiner et al., 2017; Port et al., 2016).

385           Bioinformatics and data pre-processing

386   We relied on a bioinformatic approach developed by the metabar package, adapted from Esling  
387   et al. (2015), to reduce the issue of contamination from tag-jumping, since it does not rely solely  
388   on the use of positive controls (which we lacked in this analysis) to make the estimated cutoff  
389   thresholds. However, after manually checking the fish dataset (12S primer), the final taxonomic  
390   tables still contained reads assigned to taxa that are not found in coastal lagoons in California  
391   (Table S1). Some of it might be contamination from tag-jumping, although we cannot rule out  
392   the possibility that for a few of these species the eDNA could have come from local aquaria, as  
393   some are known in the pet trade (e.g. *Acanthurus achilles*). We also cannot disregard the  
394   limitations of the reference database, especially related to the absence of estuarine and lagoonal  
395   taxa that may lead to dubious assignments to non-local related species. Due to inability to  
396   completely remove potential tag-jump contaminants from the dataset, we can expect a bias  
397   towards the rare taxa that will inflate diversity metrics in our samples for all primer sets.

398           Sediment samples generally showed higher variability among replicates compared to  
399   water samples for both primer sets, both in number of reads and community composition (Fig.  
400   S3-4). The greater consistency of water replicates is an artifact of the single source for the water  
401   samples (the large jug), while sediment replicates were done by individually sampling the bottom  
402   of the lagoon. Although replicates were done a few centimeters apart, the bottom of the lagoon  
403   appears to have small-scale heterogeneity. The spatial variation of soil and sediment samples is  
404   recognized in the literature (Perkins et al., 2014; Taberlet, Prud'Homme, et al., 2012), and can be  
405   caused by sediment composition but also by the flow dynamic and distribution of eDNA in the  
406   water column. While this variability has been shown to occur for water samples as well in lentic  
407   environments (Harper et al., 2019 and references therein), the heterogeneity of water replicates in  
408   this system still requires further investigation.

409 Sediment samples also had an overall lower number of reads compared to water samples  
410 for both primer sets (Fig. S3). The lower number of reads seems to go against the expectations  
411 that eDNA can be more concentrated in sediments (Dell'Anno & Corinaldesi, 2004; Harper et  
412 al., 2019; Turner et al., 2015). This could be due to a few issues, some of which may interact.  
413 First, it could be related to a faster degradation and/or turn-over rates of eDNA in the sediment,  
414 which are determined by the soil and eDNA characteristics, as well as enzymatic and microbial  
415 activities (Levy-Booth et al., 2007; Pietramellara et al., 2009; Torti et al., 2015). The overall  
416 lower abundance of eDNA in the sediments could also be driven by increased inhibition (Buxton  
417 et al., 2017; Pawlowski et al., 2022). Even though we used a specific soil extraction kit for both  
418 sediment and filtered water samples, the purification steps in the protocol could still not have  
419 been enough to reduce inhibition in the sediment as well as for the water samples. Lastly, this  
420 could have been driven by the much lower volume of sediment used: 0.25-0.3 g versus 500 mL  
421 for water samples.

422 There is also the fact that this type of environment is affected by scouring (purging of  
423 sediment to the ocean) during high precipitation events and increased flow of freshwater.  
424 However, since the sediment collection was done out of the rainy season and the lagoon was  
425 closed by a sandbar with no signs of scouring, we are confident that this was not a factor that  
426 could have caused the decreased ability to recover eDNA from the sediments. Therefore, we  
427 expect that this difference in read abundance between sediment and water samples would be  
428 more related to the other factors mentioned above, such as eDNA degradation and turn-over  
429 rates, inhibition, and different process volumes. Considering both the high variability and the  
430 lower sequencing throughput of the sediment replicates, we advise using a modified sampling

431 protocol, e.g. the one developed by Taberlet, Prud'Homme, et al. (2012) that includes increasing  
432 the number of replicates and mixing larger volumes before processing.

### 433 Diversity

434 Considering that contamination through tag-jumping could be inflating the numbers of rare  
435 species in the dataset, the steepness and lack of a plateau for many of the species rarefaction  
436 curves could be artificial. This is especially evident for the 12S primer, since we were able to  
437 manually investigate the taxonomy tables (Figs. 2-3). However, this lack of a plateau is an  
438 expected outcome from environmental samples (Alberdi et al., 2018), and has been shown to  
439 occur more acutely in a coastal lagoon in California when compared to other environments in  
440 California (Shirazi et al., 2021)—albeit the authors were looking specifically at plants and fungi.  
441 The high number of species recovered from the sediment for the 16S primer (Fig. 2) is likely  
442 driven by the recovery of a rich and complex sediment biota that is not paralleled in the water  
443 column.

444 The low taxonomic assignment to the species level for some of the dubious fish species  
445 found in our dataset, e.g. *Phoxinus phoxinus*, *Odontesthes* spp. and *Sebastes pachycephalus*, also  
446 highlight the need to expand barcoding efforts to the local estuarine taxa to improve reference  
447 databases. On the other hand, *Fundulus diaphanus*, the northeastern killifish, did receive a few  
448 high taxonomic scores at the species level, which merit further consideration for biomonitoring  
449 of coastal lagoons in the region.

450 Pre-freezing water prior to filtration had an effect on the species curves of the 16S primer  
451 dataset, but not on the 12S. This could be explained by how differently eDNA molecules are  
452 found in the environment for these two different groups of organisms, and how freezing and  
453 thawing water would impact them. In the case of the fish fauna, the DNA that is shed from the

454 organisms would be either found within cells, or adsorbed to colloids (Liang & Keeley, 2013;  
455 Torti et al., 2015; Turner, Barnes, et al., 2014). Even if cell walls were to disintegrate from the  
456 freezing and thawing process, they could still release intact mitochondria (which range from 1-8  
457  $\mu\text{m}$  in length) that could still be captured by our 3  $\mu\text{m}$  pore size filters. On the other hand,  
458 bacteria and archaea, which are prokaryotic and often single celled organisms, would have their  
459 DNA released directly to the medium and pass through the larger pore size filters ( $>0.2 \mu\text{m}$ ).  
460 Nevertheless, this freezing effect on cell walls has been shown to not always occur and likely be  
461 species-dependent (Sekar et al., 2009; Suomalainen et al., 2006).

#### 462 Differential abundance

463 Pre-freezing water did not introduce any significant bias in species abundance compared to the  
464 “grab-and-hold”, no freezing protocol, for any of the primer sets, even when using larger pore  
465 size filters (3  $\mu\text{m}$ ). Our results differ from other reports, where it was shown that freezing had  
466 differential effects on detection and relative abundance of different prokaryotic taxa (Kwambana  
467 et al., 2011; Sekar et al., 2009; Suomalainen et al., 2006). This could have been due to several  
468 reasons. First, the lack of effect pre-freezing had on community composition could be related to  
469 water properties of coastal lagoons that would have promoted the retention of DNA in the  
470 cellulose filters used in this analysis. Liang and Keeley (2013) have shown that presence and size  
471 of colloids, and the strength of ionic components, have an effect on increasing the binding  
472 affinities of DNA to the filters, especially the mixed cellulose esters filters (MCE). Another  
473 important aspect to consider is that the ‘nominal’ size of cellulose filters does not necessarily  
474 correspond to their ‘effective’ size. MCE filters do not have a uniform pore size like  
475 polycarbonate and nylon filters; rather, they are characterized by a ‘tortuous flow path’ from  
476 which particles are trapped more easily (Turner, Barnes, et al., 2014). This property of cellulose

477 filters likely worked to our advantage, but also causes cellulose filters to be more susceptible to  
478 clogging than others.

479         Due to eDNA precipitation and resuspension, we expect to capture some community  
480 overlap between water and surficial sediment samples, however abundances should be different  
481 following the origin and fate of the eDNA in the environment and the processes acting on it  
482 throughout (Torti et al., 2015). Not surprisingly, with the DeSeq2 analysis, we see more algae  
483 (Hemiselmidaceae and Geminigeraceae) and cyanobacteria (Aphanizomenonaceae) in the water  
484 samples, and statistically higher representation of presumptively benthic diatoms (Catenulaceae  
485 and Fragilariaceae) and foraminiferans (Elphidiidae) in the sediment. In addition, the types of  
486 environmental bacteria most abundant in the sediments were typical of soil and sediments  
487 elsewhere. Of particular note are those from anoxic environments (e.g. Anaerolineaceae and  
488 Desulfobacteraceae) as lagoon sediments are often dark and sulfide-rich.

489         The family Flavobacteriaceae was overrepresented in the water samples relative to the  
490 sediment, both in the pre- and no freezing protocols. In this family, there are important pathogens  
491 of fish and humans that belong to the genus *Flavobacterium*. (Suomalainen et al., 2006) found  
492 that *F. columnare* was more susceptible to having its cell walls disrupted to freezing due to high  
493 amounts of DNAases, lyases and proteases, likely connected to its pathogenicity, which then led  
494 to lower rates of DNA recovery. The species found in our dataset was *F. johnsoniae*, a species  
495 not known to be pathogenic—albeit with low species taxonomic score. Given that there was no  
496 difference in abundance for this species in our pre- and no freezing protocols, different from the  
497 results for the pathogenic species, *F. columnare*, this might relate to a true non-pathogenic  
498 species. However, considering that the endangered northern tidewater goby often achieves high

499 abundance in this lagoon, more detailed assessment of the *Flavobacterium* species inhabiting this  
500 site would be of interest.

501         The other species assignment that draws our attention is the archaea Candidatus  
502 *Nitrosopelagicus brevis* (Thaumarchaeota), which is significantly more abundant in sediment  
503 than water samples. As mentioned earlier, this is a pelagic species, normally found in the open  
504 ocean worldwide. Although coastal lagoons are subject to marine input, the relatively high  
505 concentration in sediment is unexpected and merits inquiry, especially considering that the  
506 confidence in its taxonomic assignment was low across reads. Likely, this represents a new  
507 environmental archaea that is abundant in coastal lagoon sediments.

#### 508         Beta diversity

509         McMurdie and Holmes (2014) recommends against rarefying datasets due to the risk of  
510 removing true, rare ASVs. However, in our case, where we were unable to completely remove  
511 tag-jumping contaminants, this pre-process could help alleviate some of the noise caused by  
512 contaminants. Nevertheless, the CAP and PERMANOVA results on both the rarefied and  
513 standardized (eDNA index) dataset mostly corroborate some of our previous findings with the  
514 DeSeq2 analysis ('Differential abundance' section), showing significant differences in  
515 assemblage composition for the 16S primer, but not the 12S primer.

516         For the rarefied 16S primer dataset, all the species that were over- and underrepresented  
517 by CAP and PERMANOVA analyses were the same as those found by DeSeq2, such as  
518 *Guillardia theta* (Geminigeraceae), which was overrepresented in the pre-freezing protocol  
519 compared to the no freezing protocol. In addition, the species of foraminifera, *Elphidium*  
520 *williamsoni* (Elphidiidae) and the archaea Candidatus *Nitrosopelagicus brevis* (Thaumarchaeota)  
521 were found to be overrepresented in sediment samples compared to water samples for both

522 freezing protocols. The CAP results on the 16S primer dataset standardized using the eDNA  
523 index (Fig. S6) showed different species as underrepresented in the sediment compared to water  
524 samples but those also showed up as significantly differentially represented in the DeSeq2  
525 analysis, with the exception of one, *Verminephrobacter aporrectodeae*.

526 Interestingly, the CAP analysis was also able to capture the underrepresentation of  
527 tidewater gobies (*E. newberryi*) in sediment samples on the 16S primer when compared to the no  
528 freezing protocol (Fig. 6B). This reinforces the idea discussed earlier ('Bioinformatics and data  
529 pre-processing' section) that fish eDNA, at least in this environment, is less concentrated in the  
530 sediment than in the water column, which contradicts other findings from the literature (Perkins  
531 et al., 2014; Turner et al., 2015). But it is worth noting that this underrepresentation of fish  
532 eDNA in the sediment was found not significant for the 12S primer, though, and there could be  
533 some bias related to how these two genes behave and degrade differently in the environment for  
534 the fish fauna.

### 535 Lessons Learned

536 Here is a list of recommendations and best practices for eDNA sampling and analysis in coastal  
537 environments that we have learned throughout this work and believe will be useful for others  
538 working in similar environments with turbid water and highly heterogeneous sediment/soil:

- 539 1. Filtered water samples had an overall higher number of reads compared to sediment for  
540 both primer sets. Therefore, we recommend the use of this protocol as it will increase  
541 chances of species detection;
- 542 2. If using sediment samples, we recommend increasing the number of replicates and  
543 mixing larger volumes before processing for DNA extractions (as in Taberlet,  
544 Prud'Homme, et al., 2012);



- 545 3. Pre-freezing water samples prior to filtration are an effective long-term storage solution  
546 and, at least for 3  $\mu\text{m}$  pore size filters, it did not introduce bias in community composition  
547 compared to no freezing;
- 548 4. The use of dual-indexing and positive controls during library preparation will help  
549 minimize and address cross-contamination from tag-jumping, as is now widely  
550 recognized in many best-practice protocols (e.g. Deiner et al., 2017; Goldberg et al.,  
551 2016);
- 552 5. Although rarefying the dataset is not recommended (McMurdie & Holmes, 2014), we  
553 recognize that it can aid in reducing the noise of contaminants from your dataset, as long  
554 as they are rare. Otherwise, the use of eDNA index (Kelly et al., 2019) can be an  
555 alternative to standardize your dataset.

## 556 Conclusions

557 In this work, we assessed environmental DNA protocols for use in coastal lagoons, a highly  
558 dynamic habitat at the intersection of terrestrial, freshwater and marine environments. Pre-  
559 freezing water combined with the use of larger pore size filters (at least up to 3  $\mu\text{m}$ ) is a viable  
560 alternative for storage and processing of turbid water samples and, at least in the case of coastal  
561 lagoons, can work for the investigation of both fish (12S, MiFish) and bacteria and archaea (16S)  
562 communities. However, the use of sediment samples as an alternative to processing water  
563 samples should be done with caution, and at minimum the number of biological replicates should  
564 be increased to more than the five used in this work. Also, while sediment samples were able to  
565 recover eDNA from organisms commonly found in the water column, such as the tidewater  
566 goby, this was achieved during a period of relatively long lagoon closure, when there was no  
567 recent scouring of sediments to the ocean.

568           While we expect these guidelines to be helpful in the development of strategies to use  
569 eDNA as a monitoring resource in similar environments, protocol testing is still strongly advised  
570 whenever possible, especially when working in a new system. Much work is necessary to  
571 understand the full potential eDNA brings for the conservation and restoration of endangered  
572 species and habitats.

573

## 574 Acknowledgements

575 Funding was provided by the National Council for Scientific and Technological Development of  
576 Brazil (Rachel Turba) under Grant No. 209261/2014-5 and by NOAA Sea Grant 120651698:1.  
577 Funding for the CALeDNA sample processing, infrastructure, and personnel was provided by the  
578 University of California Research Initiatives (UCRI) Catalyst grant CA-16-376437 and Howard  
579 Hughes Medical Institute (HHMI) Professors Grant GT10483. We are very grateful for all the  
580 help provided by the CALeDNA team, but would like to give special thanks to Teia Schweizer,  
581 who personally trained us in the bench work. Huge thanks to Ryan Kelly, for helping streamline  
582 the design and analysis of this paper and for always being so responsive via email.

583

## 584 References

- 585 Alberdi, A., Aizpurua, O., Gilbert, M. T. P., & Bohmann, K. (2018). Scrutinizing key steps for  
586 reliable metabarcoding of environmental samples. *Methods in Ecology and Evolution*,  
587 9(1), 134–147. <https://doi.org/10.1111/2041-210X.12849>
- 588 Ballard, J., Pezda, J., Spencer, D., & Plantinga, A. (n.d.). *An Economic Valuation of Southern*  
589 *California Coastal Wetlands*. [http://scwrp.org/wp-](http://scwrp.org/wp-content/uploads/2017/06/SoCalWetlands_FinalReport.pdf)  
590 [content/uploads/2017/06/SoCalWetlands\\_FinalReport.pdf](http://scwrp.org/wp-content/uploads/2017/06/SoCalWetlands_FinalReport.pdf)
- 591 Bohmann, K., Chua, P., Holman, L. E., & Lynggaard, C. (2021). DNAquaNet conference  
592 unites participants from around the world with the quest to standardize and implement  
593 DNA-based aquatic biomonitoring. *Environmental DNA*, 3(5), 884–888.  
594 <https://doi.org/10.1002/edn3.207>
- 595 Buxton, A. S., Groombridge, J. J., & Griffiths, R. A. (2017). Is the detection of aquatic  
596 environmental DNA influenced by substrate type? *PLOS ONE*, 12(8), e0183371.  
597 <https://doi.org/10.1371/journal.pone.0183371>
- 598 Callahan, B. J., McMurdie, P. J., Rosen, M. J., Han, A. W., Johnson, A. J. A., & Holmes, S. P.  
599 (2016). DADA2: High-resolution sample inference from Illumina amplicon data. *Nature*  
600 *Methods*, 13(7), 581–583. <https://doi.org/10.1038/nmeth.3869>
- 601 Caroe, C., & Bohmann, K. (2020). Tagsteady: A metabarcoding library preparation protocol to  
602 avoid false assignment of sequences to samples. *BioRxiv*.
- 603 Chen, H. (2018). *VennDiagram: Generate High-Resolution Venn and Euler Plots* (1.6.20)  
604 [Computer software]. <https://CRAN.R-project.org/package=VennDiagram>
- 605 Curd, E., Gomer, J., Kandlikar, G., Gold, Z., Ogden, M., & Shi, B. (2018). *The Anacapa Toolkit*.  
606 <https://github.com/limey-bean/Anacapa>
- 607 Curd, E., Kandlikar, G., & Gomer, J. (2018). *CRUX: Creating Reference libraries Using*  
608 *eXisting tools*. [https://github.com/limey-bean/CRUX\\_Creating-Reference-libraries-](https://github.com/limey-bean/CRUX_Creating-Reference-libraries-Using-eXisting-tools)  
609 [Using-eXisting-tools](https://github.com/limey-bean/CRUX_Creating-Reference-libraries-Using-eXisting-tools)
- 610 Deiner, K., Bik, H. M., Mächler, E., Seymour, M., Lacoursière-Roussel, A., Altermatt, F., Creer,  
611 S., Bista, I., Lodge, D. M., & De Vere, N. (2017). Environmental DNA metabarcoding:  
612 Transforming how we survey animal and plant communities. *Molecular Ecology*, 26(21),  
613 5872–5895.
- 614 Deiner, K., Walser, J.-C., Mächler, E., & Altermatt, F. (2015). Choice of capture and extraction  
615 methods affect detection of freshwater biodiversity from environmental DNA. *Biological*  
616 *Conservation*, 183, 53–63.
- 617 Dejean, T., Valentini, A., Miquel, C., Taberlet, P., Bellemain, E., & Miaud, C. (2012). Improved  
618 detection of an alien invasive species through environmental DNA barcoding: The  
619 example of the American bullfrog *Lithobates catesbeianus*: *Alien invasive species*  
620 *detection using eDNA*. *Journal of Applied Ecology*, 49(4), 953–959.  
621 <https://doi.org/10.1111/j.1365-2664.2012.02171.x>
- 622 Dell'Anno, A., & Corinaldesi, C. (2004). Degradation and Turnover of Extracellular DNA in  
623 Marine Sediments: Ecological and Methodological Considerations Degradation and  
624 Turnover of Extracellular DNA in Marine Sediments: Ecological and Methodological  
625 Considerations. *Applied and Environmental Microbiology*, 70(7), 4384–4386.  
626 <https://doi.org/10.1128/AEM.70.7.4384>
- 627 Doi, H., Uchii, K., Matsushashi, S., Takahara, T., Yamanaka, H., & Minamoto, T. (2017).  
628 Isopropanol precipitation method for collecting fish environmental DNA. *Limnology and*  
629 *Oceanography: Methods*, 15(2), 212–218. <https://doi.org/10.1002/lom3.10161>

- 630 Earl, D. A., Louie, K. D., Bardeleben, C., Swift, C. C., & Jacobs, D. K. (2010). Rangewide  
631 microsatellite phylogeography of the endangered tidewater goby, a genetically  
632 subdivided coastal fish with limited marine dispersal. *Conservation Genetics*, *11*, 103–  
633 104. <https://doi.org/10.1007/s10592-009-0008-9>
- 634 Esling, P., Lejzerowicz, F., & Pawlowski, J. (2015). Accurate multiplexing and filtering for high-  
635 throughput amplicon-sequencing. *Nucleic Acids Research*, *43*(5), 2513–2524.  
636 <https://doi.org/10.1093/nar/gkv107>
- 637 *FASTX-Toolkit*. (n.d.). Retrieved January 11, 2018, from [http://hannonlab.cshl.edu/fastx\\_toolkit/](http://hannonlab.cshl.edu/fastx_toolkit/)
- 638 Ficetola, G. F., Miaud, C., Pompanon, F., & Taberlet, P. (2008). Species detection using  
639 environmental DNA from water samples. *Biology Letters*, *4*(4), 423–425.  
640 <https://doi.org/10.1098/rsbl.2008.0118>
- 641 Gao, X., Lin, H., Revanna, K., & Dong, Q. (2017). A Bayesian taxonomic classification method  
642 for 16S rRNA gene sequences with improved species-level accuracy. *BMC*  
643 *Bioinformatics*, *18*(1), 247. <https://doi.org/10.1186/s12859-017-1670-4>
- 644 Gbif.Org. (2022). *Occurrence Download* (p. 170487) [Darwin Core Archive]. The Global  
645 Biodiversity Information Facility. <https://doi.org/10.15468/DL.HTJ3HT>
- 646 Goldberg, C. S., Turner, C. R., Deiner, K., Klymus, K. E., Thomsen, P. F., Murphy, M. A.,  
647 Spear, S. F., McKee, A., Oyler-McCance, S. J., & Cornman, R. S. (2016). Critical  
648 considerations for the application of environmental DNA methods to detect aquatic  
649 species. *Methods in Ecology and Evolution*, *7*(11), 1299–1307.
- 650 Harper, L. R., Buxton, A. S., Rees, H. C., Bruce, K., Brys, R., Halfmaerten, D., Read, D. S.,  
651 Watson, H. V., Sayer, C. D., & Jones, E. P. (2019). Prospects and challenges of  
652 environmental DNA (eDNA) monitoring in freshwater ponds. *Hydrobiologia*, *826*(1),  
653 25–41.
- 654 Hinlo, R., Gleeson, D., Lintermans, M., & Furlan, E. (2017). Methods to maximise recovery of  
655 environmental DNA from water samples. *PloS One*, *12*(6), e0179251.
- 656 Jacobs, D. K., Stein, E. D., & Longcore, T. (2011). Classification of California Estuaries Based  
657 on Natural Closure Patterns: Templates for Restoration and Management Management.  
658 *Technical Report, August*, 1–72.
- 659 Kandlikar, G. (2020). *ranacapa: Utility Functions and “shiny” App for Simple Environmental*  
660 *DNA Visualizations and Analyses* (0.1.0) [Computer software].  
661 <https://github.com/gauravsk/ranacapa>
- 662 Kelly, R. P., Shelton, A. O., & Gallego, R. (2019). Understanding PCR Processes to Draw  
663 Meaningful Conclusions from Environmental DNA Studies. *Scientific Reports*, *9*(1),  
664 12133. <https://doi.org/10.1038/s41598-019-48546-x>
- 665 Kircher, M., Sawyer, S., & Meyer, M. (2012). Double indexing overcomes inaccuracies in  
666 multiplex sequencing on the Illumina platform. *Nucleic Acids Research*, *40*(1), e3–e3.  
667 <https://doi.org/10.1093/nar/gkr771>
- 668 Kumar, G., Farrell, E., Reaume, A. M., Eble, J. A., & Gaither, M. R. (2022). One size does not  
669 fit all: Tuning eDNA protocols for high and low turbidity water sampling.  
670 *Environmental DNA*, *4*(1), 167–180. <https://doi.org/10.1002/edn3.235>
- 671 Kwambana, B. A., Mohammed, N. I., Jeffries, D., Barer, M., Adegbola, R. A., & Antonio, M.  
672 (2011). Differential effects of frozen storage on the molecular detection of bacterial taxa  
673 that inhabit the nasopharynx. *BMC Clinical Pathology*, *11*(1), 2.  
674 <https://doi.org/10.1186/1472-6890-11-2>

- 675 Langmead, B., & Salzberg, S. L. (2012). Fast gapped-read alignment with Bowtie 2. *Nature*  
676 *Methods*, 9(4), 357–359. <https://doi.org/10.1038/nmeth.1923>
- 677 Laramie, M. B., Pilliod, D. S., Goldberg, C. S., & Strickler, K. M. (2015). Environmental DNA  
678 sampling protocol—Filtering water to capture DNA from aquatic organisms. *U.S*  
679 *Geological Survey Techniques and Methods, Book 2*(Chapter A13), 15 p.  
680 <https://doi.org/10.3133/TM2A13>
- 681 Larsson, A. J. M., Stanley, G., Sinha, R., Weissman, I. L., & Sandberg, R. (2018).  
682 Computational correction of index switching in multiplexed sequencing libraries. *Nature*  
683 *Methods*, 15(5), 305–307. <https://doi.org/10.1038/nmeth.4666>
- 684 Levy-Booth, D. J., Campbell, R. G., Gulden, R. H., Hart, M. M., Powell, J. R., Klironomos, J.  
685 N., Pauls, K. P., Swanton, C. J., Trevors, J. T., & Dunfield, K. E. (2007). Cycling of  
686 extracellular DNA in the soil environment. *Soil Biology and Biochemistry*, 39(12), 2977–  
687 2991. <https://doi.org/10.1016/j.soilbio.2007.06.020>
- 688 Li, J., Lawson Handley, L.-J., Read, D. S., & Hänfling, B. (2018). The effect of filtration method  
689 on the efficiency of environmental DNA capture and quantification via metabarcoding.  
690 *Molecular Ecology Resources*, 18(5), 1102–1114.
- 691 Liang, Z., & Keeley, A. (2013). Filtration Recovery of Extracellular DNA from Environmental  
692 Water Samples. *Environmental Science & Technology*, 47(16), 9324–9331.  
693 <https://doi.org/10.1021/es401342b>
- 694 Love, M. I., Huber, W., & Anders, S. (2014). Moderated estimation of fold change and  
695 dispersion for RNA-seq data with DESeq2. *Genome Biology*, 15(12), 550.  
696 <https://doi.org/10.1186/s13059-014-0550-8>
- 697 Majaneva, M., Diserud, O. H., Eagle, S. H., Boström, E., Hajibabaei, M., & Ekrem, T. (2018).  
698 Environmental DNA filtration techniques affect recovered biodiversity. *Scientific*  
699 *Reports*, 8(1), 1–11.
- 700 Martin, M. (2013). Cutadapt removes adapter sequences from high-throughput sequencing reads.  
701 *EMBnet.Journal*, 17(1), 10–12.
- 702 McMurdie, P. J., & Holmes, S. (2013). phyloseq: An R Package for Reproducible Interactive  
703 Analysis and Graphics of Microbiome Census Data. *PLoS ONE*, 8(4), e61217.  
704 <https://doi.org/10.1371/journal.pone.0061217>
- 705 McMurdie, P. J., & Holmes, S. (2014). Waste Not, Want Not: Why Rarefying Microbiome Data  
706 Is Inadmissible. *PLoS Computational Biology*, 10(4), e1003531.  
707 <https://doi.org/10.1371/journal.pcbi.1003531>
- 708 Nico, L., Fuller, P., & Neilson, M. (2022). *Acanthogobius flavimanus* (Temminck and Schlegel,  
709 1845). U.S. Geological Survey, Nonindigenous Aquatic Species Database.  
710 <https://nas.er.usgs.gov/queries/FactSheet.aspx?speciesID=707>
- 711 Oksanen, J., Blanchet, F. G., Friendly, M., Kindt, R., Legendre, P., McGlinn, D., Minchin, P. R.,  
712 O'Hara, R. B., Simpson, G. L., Solymos, P., Stevens, M. H. H., Szoecs, E., & Wagner, H.  
713 (2019). *vegan: Community Ecology Package* (2.5-6) [Computer software].  
714 <https://CRAN.R-project.org/package=vegan>
- 715 Pawlowski, J., Bruce, K., Panksep, K., Aguirre, F. I., Amalfitano, S., Apothéloz-Perret-Gentil,  
716 L., Baussant, T., Bouchez, A., Carugati, L., Cermakova, K., Cordier, T., Corinaldesi, C.,  
717 Costa, F. O., Danovaro, R., Dell'Anno, A., Duarte, S., Eisendle, U., Ferrari, B. J. D.,  
718 Frontalini, F., ... Fazi, S. (2022). Environmental DNA metabarcoding for benthic  
719 monitoring: A review of sediment sampling and DNA extraction methods. *Science of The*  
720 *Total Environment*, 818, 151783. <https://doi.org/10.1016/j.scitotenv.2021.151783>

- 721 Perkins, T. L., Clements, K., Baas, J. H., Jago, C. F., Jones, D. L., Malham, S. K., & McDonald,  
722 J. E. (2014). Sediment Composition Influences Spatial Variation in the Abundance of  
723 Human Pathogen Indicator Bacteria within an Estuarine Environment. *PLoS ONE*, 9(11),  
724 e112951. <https://doi.org/10.1371/journal.pone.0112951>
- 725 Pietramellara, G., Ascher, J., Borgogni, F., Ceccherini, M. T., Guerri, G., & Nannipieri, P.  
726 (2009). Extracellular DNA in soil and sediment: Fate and ecological relevance. *Biology  
727 and Fertility of Soils*, 45(3), 219–235. <https://doi.org/10.1007/s00374-008-0345-8>
- 728 Pilliod, D. S., Goldberg, C. S., Arkle, R. S., Waits, L. P., & Richardson, J. (2013). Estimating  
729 occupancy and abundance of stream amphibians using environmental DNA from filtered  
730 water samples. *Canadian Journal of Fisheries and Aquatic Sciences*, 70(8), 1123–1130.  
731 <https://doi.org/10.1139/cjfas-2013-0047>
- 732 Port, J. A., O'Donnell, J. L., Romero Maraccini, O. C., Leary, P. R., Litvin, S. Y., Nickols, K.  
733 J., Yamahara, K. M., & Kelly, R. P. (2016). Assessing vertebrate biodiversity in a kelp  
734 forest ecosystem using environmental DNA. *Molecular Ecology*, 25(2), 527–541.  
735 <https://doi.org/10.1111/mec.13481>
- 736 R Core Team. (2018). *R: A language and environment for statistical computing*. R Foundation  
737 for Statistical Computing. <https://www.R-project.org/>
- 738 Rees, H. C., Maddison, B. C., Middleditch, D. J., Patmore, J. R. M., & Gough, K. C. (2014).  
739 REVIEW: The detection of aquatic animal species using environmental DNA – a review  
740 of eDNA as a survey tool in ecology. *Journal of Applied Ecology*, 51(5), 1450–1459.  
741 <https://doi.org/10.1111/1365-2664.12306>
- 742 Robson, H. L. A., Noble, T. H., Saunders, R. J., Robson, S. K. A., Burrows, D. W., & Jerry, D.  
743 R. (2016). Fine-tuning for the tropics: Application of eDNA technology for invasive fish  
744 detection in tropical freshwater ecosystems. *Molecular Ecology Resources*, 16(4), 922–  
745 932. <https://doi.org/10.1111/1755-0998.12505>
- 746 RStudio Team. (2020). *RStudio: Integrated Development for R*. RStudio, PBC.  
747 <http://www.rstudio.com/>
- 748 Sales, N. G., Wangenstein, O. S., Carvalho, D. C., & Mariani, S. (2019). Influence of  
749 preservation methods, sample medium and sampling time on eDNA recovery in a  
750 neotropical river. *Environmental DNA*, 1(2), edn3.14. <https://doi.org/10.1002/edn3.14>
- 751 Santoro, A. E., Dupont, C. L., Richter, R. A., Craig, M. T., Carini, P., McIlvin, M. R., Yang, Y.,  
752 Orsi, W. D., Moran, D. M., & Saito, M. A. (2015). Genomic and proteomic  
753 characterization of “Candidatus Nitrosopelagicus brevis”: An ammonia-oxidizing  
754 archaeon from the open ocean. *Proceedings of the National Academy of Sciences*, 112(4),  
755 1173–1178. <https://doi.org/10.1073/pnas.1416223112>
- 756 Sard, N. M., Herbst, S. J., Nathan, L., Uhrig, G., Kanefsky, J., Robinson, J. D., & Scribner, K. T.  
757 (2019). Comparison of fish detections, community diversity, and relative abundance  
758 using environmental DNA metabarcoding and traditional gears. *Environmental DNA*,  
759 1(4), 368–384. <https://doi.org/10.1002/edn3.38>
- 760 Schaarschmidt, F., & Gerhard, D. (2019). *PairwiseCI: Confidence Intervals for Two Sample  
761 Comparisons (0.1-27)* [Computer software]. [https://CRAN.R-  
762 project.org/package=pairwiseCI](https://CRAN.R-project.org/package=pairwiseCI)
- 763 Schnell, I. B., Bohmann, K., & Gilbert, M. T. P. (2015). Tag jumps illuminated—Reducing  
764 sequence-to-sample misidentifications in metabarcoding studies. *Molecular Ecology  
765 Resources*, 15(6), 1289–1303. <https://doi.org/10.1111/1755-0998.12402>

- 766 SCWRP. (2018). *Wetlands on the Edge: The Future of Southern California's Wetlands:*  
767 *Regional Strategy 2018* (p. 142). California State Coastal Conservancy.  
768 [scwrp.databasin.org](http://scwrp.databasin.org)
- 769 Sekar, R., Kaczmarek, L. T., & Richardson, L. L. (2009). Effect of Freezing on PCR  
770 Amplification of 16S rRNA Genes from Microbes Associated with Black Band Disease  
771 of Corals. *Applied and Environmental Microbiology*, 75(8), 2581–2584.  
772 <https://doi.org/10.1128/AEM.01500-08>
- 773 Shaffer, H. B., Fellers, G. M., Randal Voss, S., Oliver, J. C., & Pauly, G. B. (2004). Species  
774 boundaries, phylogeography and conservation genetics of the red-legged frog (*Rana*  
775 *aurora/draytonii*) complex. *Molecular Ecology*, 13(9), 2667–2677.  
776 <https://doi.org/10.1111/j.1365-294X.2004.02285.x>
- 777 Shirazi, S., Meyer, R. S., & Shapiro, B. (2021). Revisiting the effect of PCR replication and  
778 sequencing depth on biodiversity metrics in environmental DNA metabarcoding. *Ecology*  
779 *and Evolution*, 11(22), 15766–15779. <https://doi.org/10.1002/ece3.8239>
- 780 Smart, A. S., Weeks, A. R., Rooyen, A. R., Moore, A., McCarthy, M. A., & Tingley, R. (2016).  
781 Assessing the cost–efficiency of environmental DNA sampling. *Methods in Ecology and*  
782 *Evolution*, 7(11), 1291–1298. <https://doi.org/10.1111/2041-210X.12598>
- 783 Stein, E. D., Cayce, K., Salomon, M., Bram, D. L., De Mello, D., Grossinger, R., & Dark, S.  
784 (2014). *Wetlands of the Southern California Coast: Historical Extent and Change Over*  
785 *Time* (SFEI Report 720; SCCWRP Technical Report 826; p. 58). Southern California  
786 Coastal Water Research Project and San Francisco Estuary Institute.  
787 <https://www.caltsheets.org/socal/download.html>
- 788 Suomalainen, L.-R., Reunanen, H., Ijäs, R., Valtonen, E. T., & Tirola, M. (2006). Freezing  
789 Induces Biased Results in the Molecular Detection of *Flavobacterium columnare*.  
790 *Applied and Environmental Microbiology*, 72(2), 1702–1704.  
791 <https://doi.org/10.1128/AEM.72.2.1702-1704.2006>
- 792 Swift, C. C., Haglund, T. R., Ruiz, M., & Fisher, R. N. (1993). The Status and Distribution of the  
793 Freshwater Fishes of Southern California. *Bulletin of the Southern California Academy of*  
794 *Sciences*, 92(3), 101–167.
- 795 Swift, C. C., Spies, B., Ellingson, R. A., & Jacobs, D. K. (2016). A New Species of the Bay  
796 Goby Genus *Eucyclogobius*, Endemic to Southern California: Evolution, Conservation,  
797 and Decline. *PloS One*, 11(7), e0158543. <https://doi.org/10.1371/journal.pone.0158543>
- 798 Taberlet, P., Coissac, E., Pompanon, F., Brochmann, C., & Willerslev, E. (2012). Towards next-  
799 generation biodiversity assessment using DNA metabarcoding: NEXT-GENERATION  
800 DNA METABARCODING. *Molecular Ecology*, 21(8), 2045–2050.  
801 <https://doi.org/10.1111/j.1365-294X.2012.05470.x>
- 802 Taberlet, P., Prud'Homme, S. M., Campione, E., Roy, J., Miquel, C., Shehzad, W., Gielly, L.,  
803 Rioux, D., Choler, P., Clément, J.-C., Melodelima, C., Pompanon, F., & Coissac, E.  
804 (2012). Soil sampling and isolation of extracellular DNA from large amount of starting  
805 material suitable for metabarcoding studies: EXTRACTION OF EXTRACELLULAR  
806 DNA FROM SOIL. *Molecular Ecology*, 21(8), 1816–1820.  
807 <https://doi.org/10.1111/j.1365-294X.2011.05317.x>
- 808 Takahara, T., Minamoto, T., & Doi, H. (2015). Effects of sample processing on the detection rate  
809 of environmental DNA from the Common Carp (*Cyprinus carpio*). *Biological*  
810 *Conservation*, 183, 64–69. <https://doi.org/10.1016/j.biocon.2014.11.014>

- 811 Thomsen, P. F., & Willerslev, E. (2015). Environmental DNA – An emerging tool in  
812 conservation for monitoring past and present biodiversity. *Biological Conservation*, *183*,  
813 4–18. <https://doi.org/10.1016/j.biocon.2014.11.019>
- 814 Torti, A., Lever, M. A., & Jørgensen, B. B. (2015). Origin, dynamics, and implications of  
815 extracellular DNA pools in marine sediments. *Marine Genomics*, *24*, 185–196.  
816 <https://doi.org/10.1016/j.margen.2015.08.007>
- 817 Tsuji, S., Takahara, T., Doi, H., Shibata, N., & Yamanaka, H. (2019). The detection of aquatic  
818 macroorganisms using environmental DNA analysis—A review of methods for  
819 collection, extraction, and detection. *Environmental DNA*, *1*(2), 99–108.  
820 <https://doi.org/10.1002/edn3.21>
- 821 Turner, C. R., Barnes, M. A., Xu, C. C. Y., Jones, S. E., Jerde, C. L., & Lodge, D. M. (2014).  
822 Particle size distribution and optimal capture of aqueous microbial eDNA. *Methods in*  
823 *Ecology and Evolution*, *5*(7), 676–684. <https://doi.org/10.1111/2041-210X.12206>
- 824 Turner, C. R., Miller, D. J., Coyne, K. J., & Corush, J. (2014). Improved methods for capture,  
825 extraction, and quantitative assay of environmental DNA from Asian bigheaded carp  
826 (hypophthalmichthys spp.). *PLoS ONE*, *9*(12), 1–20.  
827 <https://doi.org/10.1371/journal.pone.0114329>
- 828 Turner, C. R., Uy, K. L., & Everhart, R. C. (2015). Fish environmental DNA is more  
829 concentrated in aquatic sediments than surface water. *Biological Conservation*, *183*, 93–  
830 102. <https://doi.org/10.1016/j.biocon.2014.11.017>
- 831 van der Loos, L. M., & Nijland, R. (2021). Biases in bulk: DNA metabarcoding of marine  
832 communities and the methodology involved. *Molecular Ecology*, *30*(13), 3270–3288.  
833 <https://doi.org/10.1111/mec.15592>
- 834 WeatherSpark.com. (n.d.). *Historical Weather Summer 2018 at Point Mugu Naval Air Warfare*  
835 *Center*. WeatherSpark.Com. Retrieved June 8, 2022, from  
836 [https://weatherspark.com/h/s/145310/2018/1/Historical-Weather-Summer-2018-at-Point-](https://weatherspark.com/h/s/145310/2018/1/Historical-Weather-Summer-2018-at-Point-Mugu-Naval-Air-Warfare-Center;-California;-United-States#Figures-Rainfall)  
837 [Mugu-Naval-Air-Warfare-Center;-California;-United-States#Figures-Rainfall](https://weatherspark.com/h/s/145310/2018/1/Historical-Weather-Summer-2018-at-Point-Mugu-Naval-Air-Warfare-Center;-California;-United-States#Figures-Rainfall)
- 838 Williams, K. E., Huyvaert, K. P., & Piaggio, A. J. (2017). Clearing muddied waters: Capture of  
839 environmental DNA from turbid waters. *PLOS ONE*, *12*(7), e0179282.  
840 <https://doi.org/10.1371/journal.pone.0179282>
- 841 Zinger, L., Lionnet, C., Benoiston, A.-S., Donald, J., Mercier, C., & Boyer, F. (2020). *metabaR*:  
842 *An R package for the evaluation and improvement of DNA metabarcoding data quality*  
843 [Preprint]. Bioinformatics. <https://doi.org/10.1101/2020.08.28.271817>  
844  
845



846 Tables

847 Table 1: Detailed information of the primers used.

| Primer | Targets                    | Forward Primer                 | Reverse Primer                  | Reference                                                 |
|--------|----------------------------|--------------------------------|---------------------------------|-----------------------------------------------------------|
| 12S    | Fish                       | GTCGGTAAACTCGTG<br>CCAGC       | CATAGTGGGGTATCT<br>AATCCCAGTTTG | Miya <i>et al.</i> 2015                                   |
| 16S    | Bacteria<br>and<br>archaea | GTGYCAGCMGCCGCGG<br>TAA        | GGACTACNVGGGTWT<br>CTAAT        | Caporaso <i>et al.</i> ,<br>2012 (F: 515F and<br>R: 806R) |
| CO1    | Animals                    | GGWACWGGWTGAACW<br>GTWTAYCCYCC | TANACYTCnGGRTGN<br>CCRAARAAAYCA | Leray <i>et al.</i> 2013                                  |

848

849 Table 2: Pairwise PERMANOVA (rarefied dataset) between all three protocols: pre- and no  
850 freezing water prior to filtration and sediment samples. P.adjusted is the adjusted p-value after  
851 FDR correction.

| Primer | Comparison                  | F.Model | R <sup>2</sup> | p.value | p.adjusted |
|--------|-----------------------------|---------|----------------|---------|------------|
|        | No freezing vs Pre-freezing | 2.07252 | 0.20576        | 0.151   | 0.297      |
| 12S    | No freezing vs Sediment     | 3.56051 | 0.41592        | 0.297   | 0.297      |
|        | Pre-freezing vs Sediment    | 2.25713 | 0.31102        | 0.224   | 0.297      |
|        | No freezing vs Pre-freezing | 10.3356 | 0.56369        | 0.008   | 0.012      |
| 16S    | No freezing vs Sediment     | 12.1022 | 0.63355        | 0.012   | 0.012      |
|        | Pre-freezing vs Sediment    | 12.5474 | 0.6419         | 0.008   | 0.012      |

852

853 Table 3: Pairwise PERMANOVA (eDNA index dataset) between all three protocols: pre- and no  
854 freezing water prior to filtration and sediment samples. P.adjusted is the adjusted p-value after  
855 FDR correction.

| Primer | Comparison                  | F.Model  | R <sup>2</sup> | p.value | p.adjusted |
|--------|-----------------------------|----------|----------------|---------|------------|
|        | No freezing vs Pre-freezing | 1.479053 | 0.156034       | 0.007   | 0.016      |
| 16S    | No freezing vs Sediment     | 5.965368 | 0.427154       | 0.011   | 0.016      |
|        | Pre-freezing vs Sediment    | 6.514592 | 0.448831       | 0.016   | 0.016      |

856

857 Figure legends

858 Figure 1: Photo of Topanga lagoon taken on August 22nd, 2018, a few weeks after collection.  
859 There was no record of precipitation for the previous three months and the lagoon was closed to  
860 the ocean by a sandbar. There was also no sign of recent waves topping over the sandbar and  
861 reaching the lagoon.

862

863 Figure 2: Venn diagrams of A) 12S and B) 16S primers showing the number of species found at  
864 and between each protocol. Sediment samples showed the highest number of unique species for  
865 both primers, although for the 12S dataset, about 28% are the result of contamination from tag-  
866 jumping.

867

868 Figure 3: Species rarefaction curves based on sequencing effort for each protocol. A) 12S  
869 primer; B) 16S primer. With the exception of the water samples for the 12S primer, none of the  
870 curves have reached a plateau, although we expect the high diversity seen for the 12S sediment  
871 samples be due to contamination from tag-jumping.

872

873 Figure 4: Confidence interval (CI) for slopes of rarefaction curves (Fig. 3) for each pairwise  
874 comparison of the different protocols. Only the comparison between pre- versus no freezing  
875 water samples, and pre-freezing versus sediment samples for the 12S primer (A) have come out  
876 non significant. The remaining comparisons showed significant differences between rarefaction  
877 slopes.

878

879 Figure 5: Plots of log<sub>2</sub>fold change of families of bacteria and archaea (16S primer) for the  
880 pairwise comparison between A) no freezing versus sediment; and B) pre-freezing versus  
881 sediment. Circles are colored by phylum. Species present above zero are overrepresented in the  
882 pre- or no freezing protocol, and species below the zero threshold are overrepresented in the  
883 sediments.

884

885 Figure 6: Constrained Analysis of Principal Coordinates (CAP) of A) 12S and B) 16S primer  
886 rarefied datasets. Circles are colored by protocol.

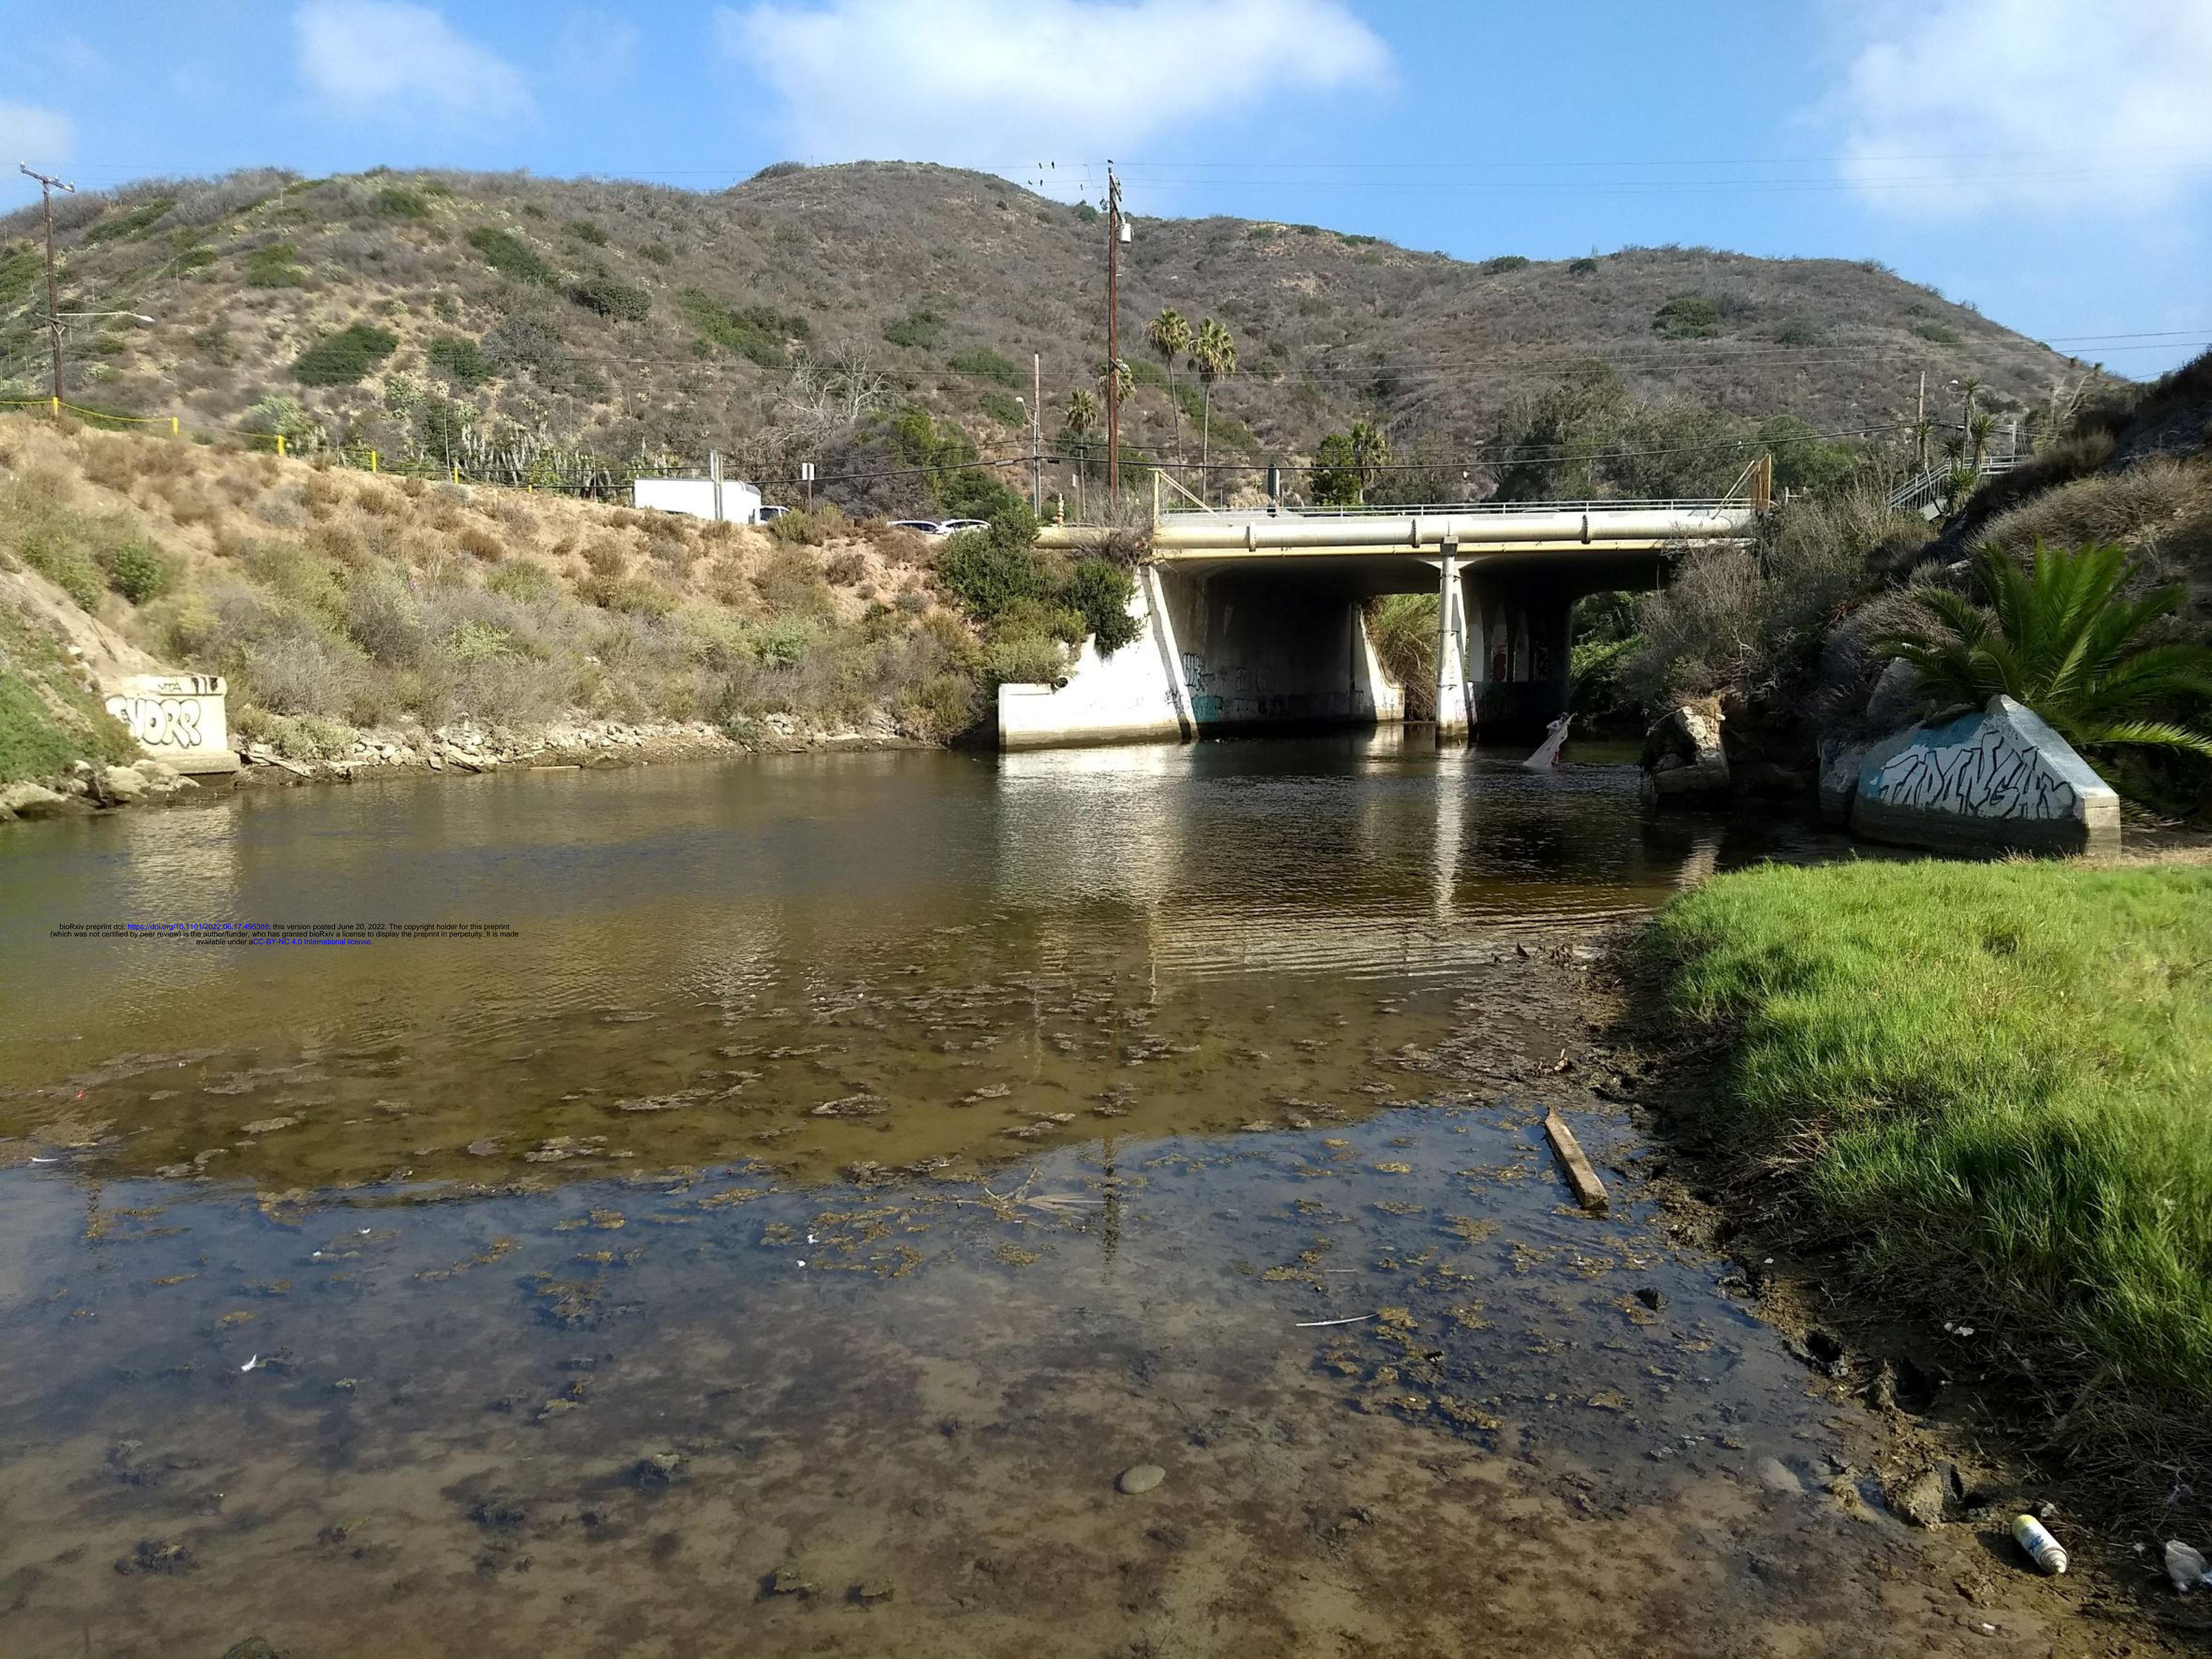

bioRxiv preprint doi: <https://doi.org/10.1101/2022.06.17.497389>; this version posted June 20, 2022. The copyright holder for this preprint (which was not certified by peer review) is the author/funder, who has granted bioRxiv a license to display the preprint in perpetuity. It is made available under a [CC-BY-NC 4.0 International license](#).

A) 12S

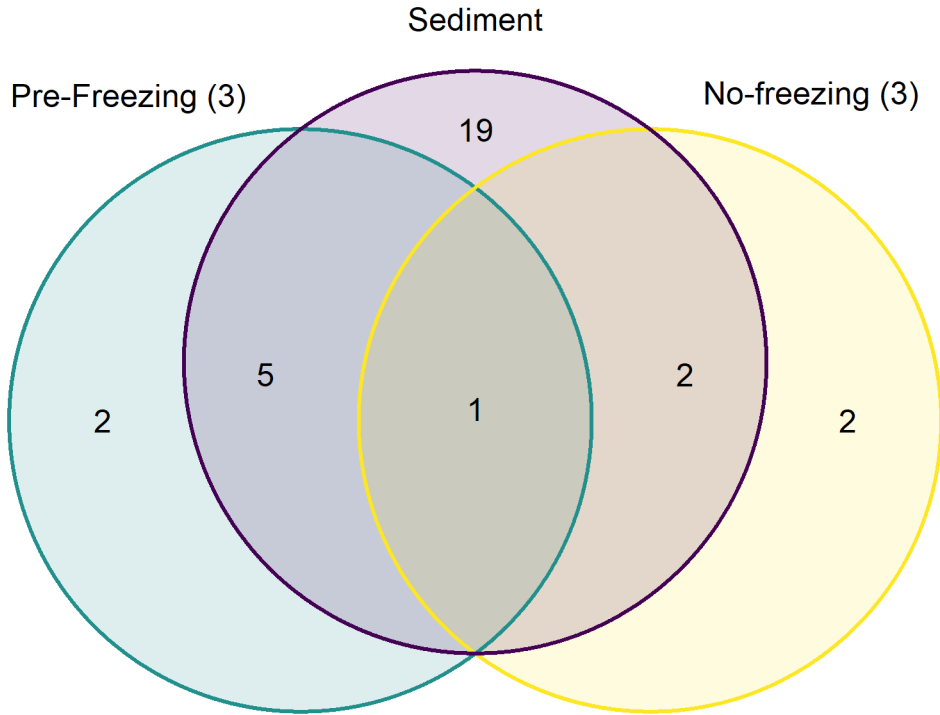

B) 16S

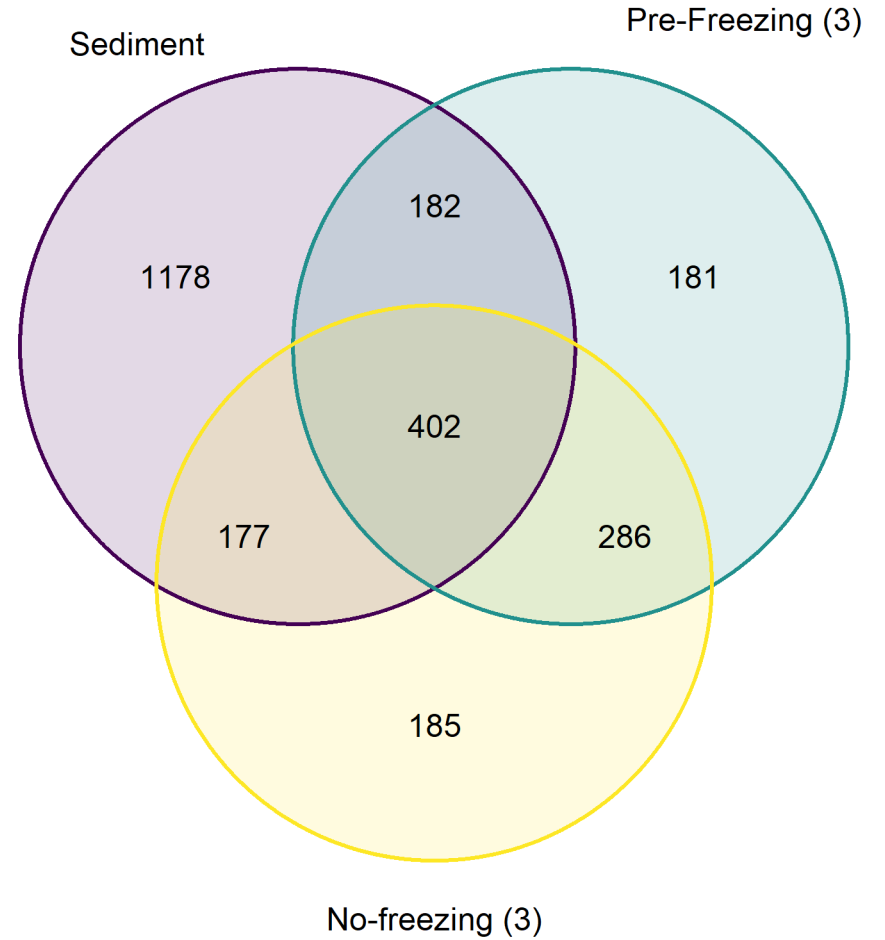

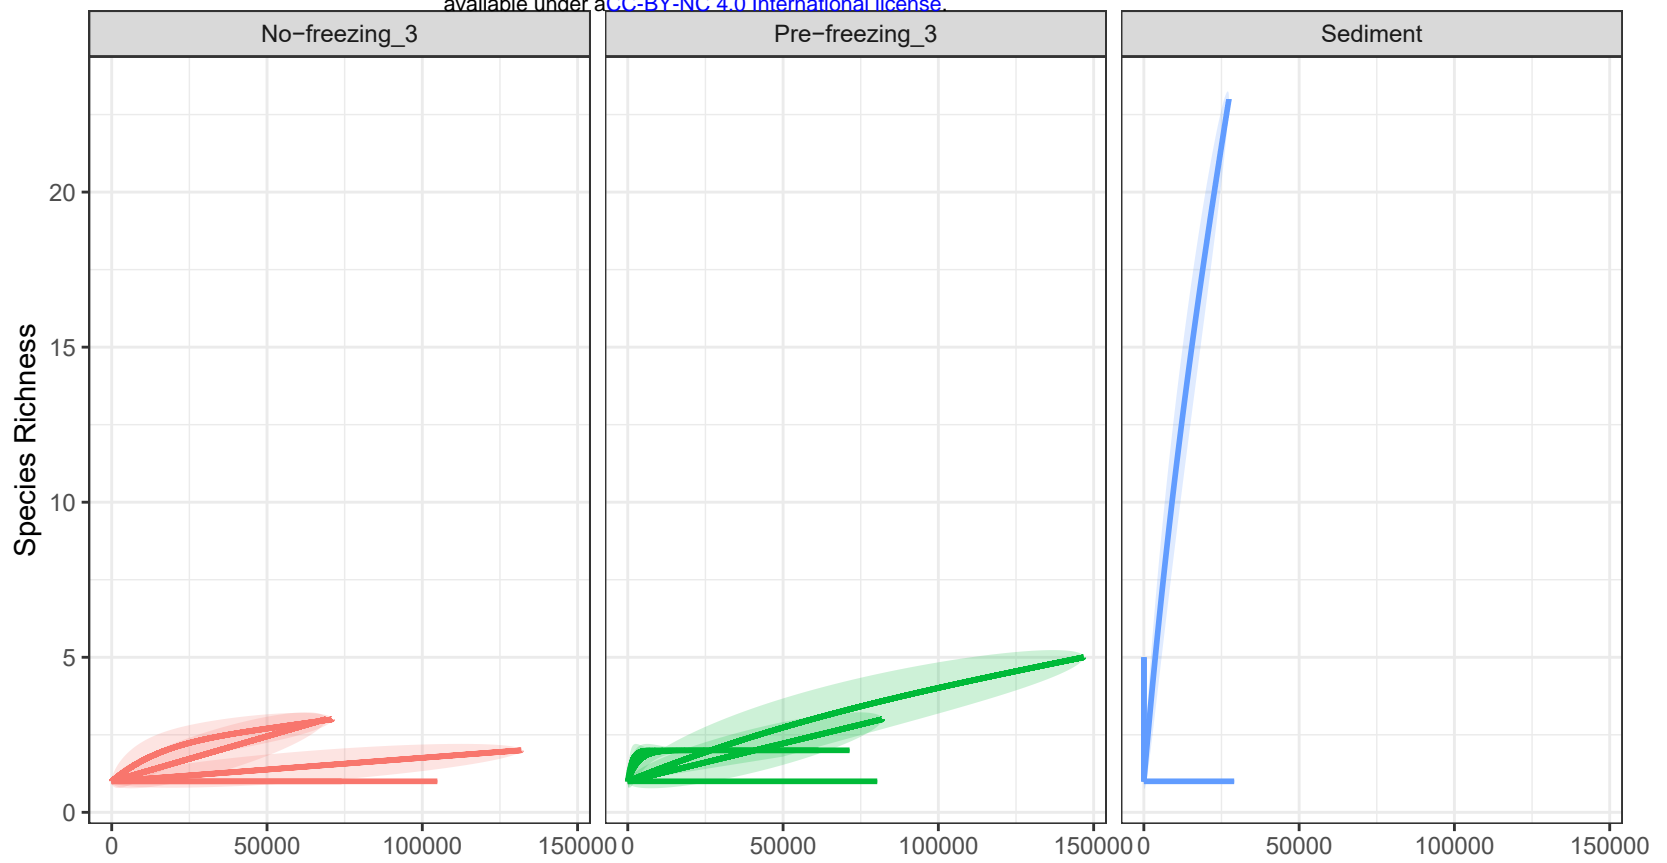

B) 16S

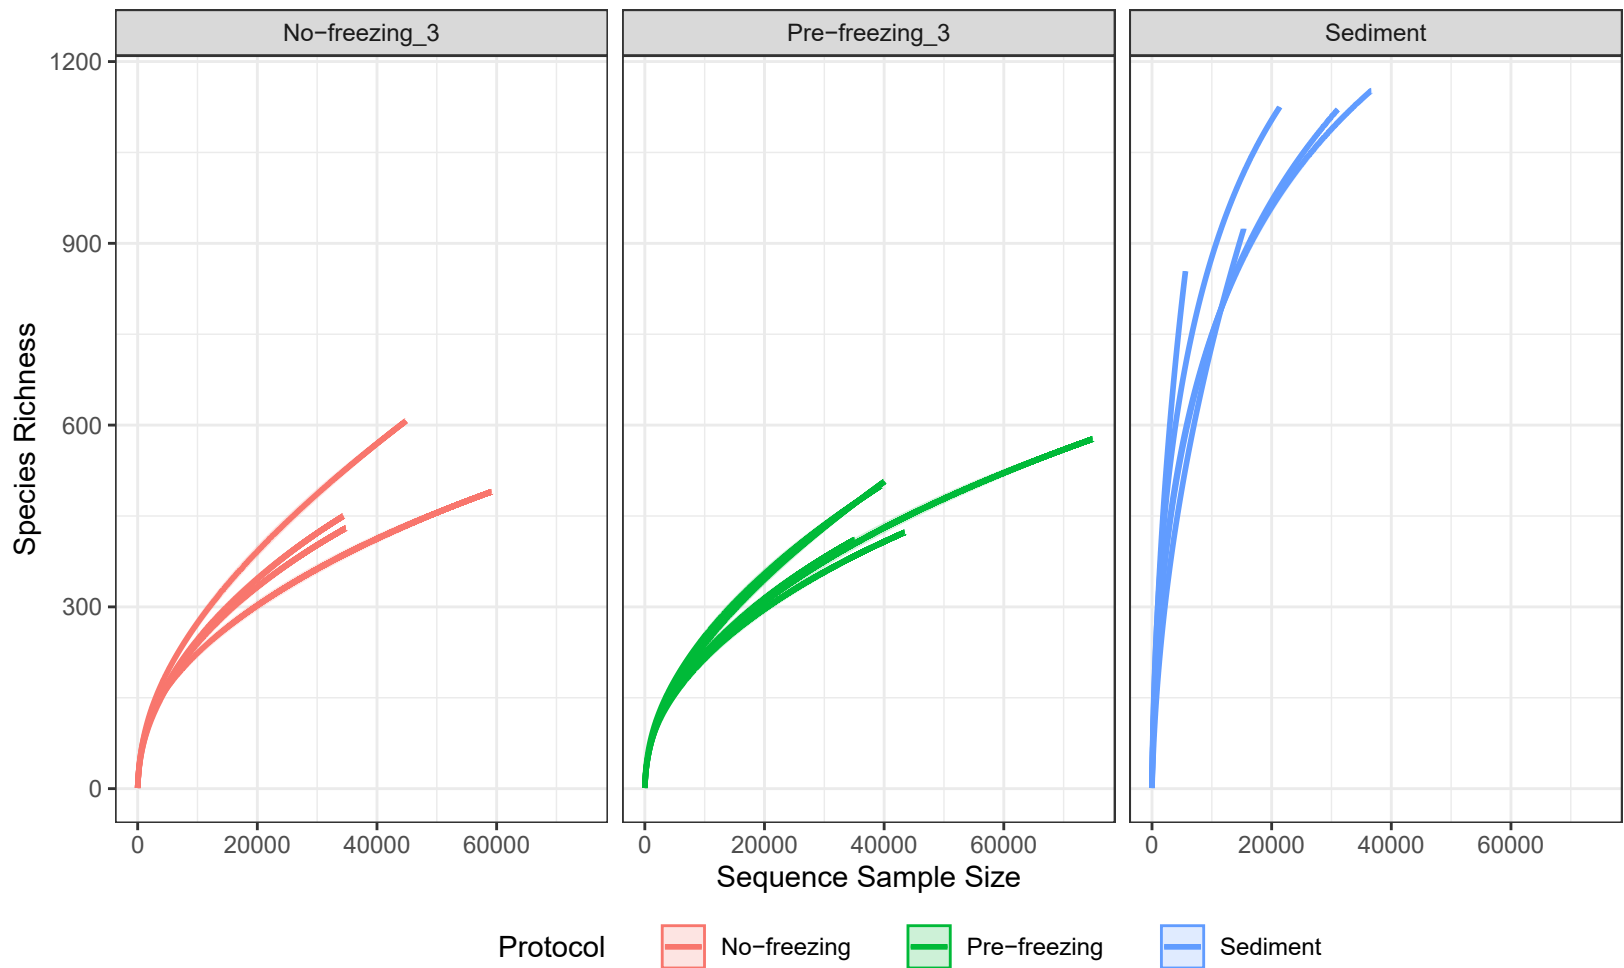

A) 12S

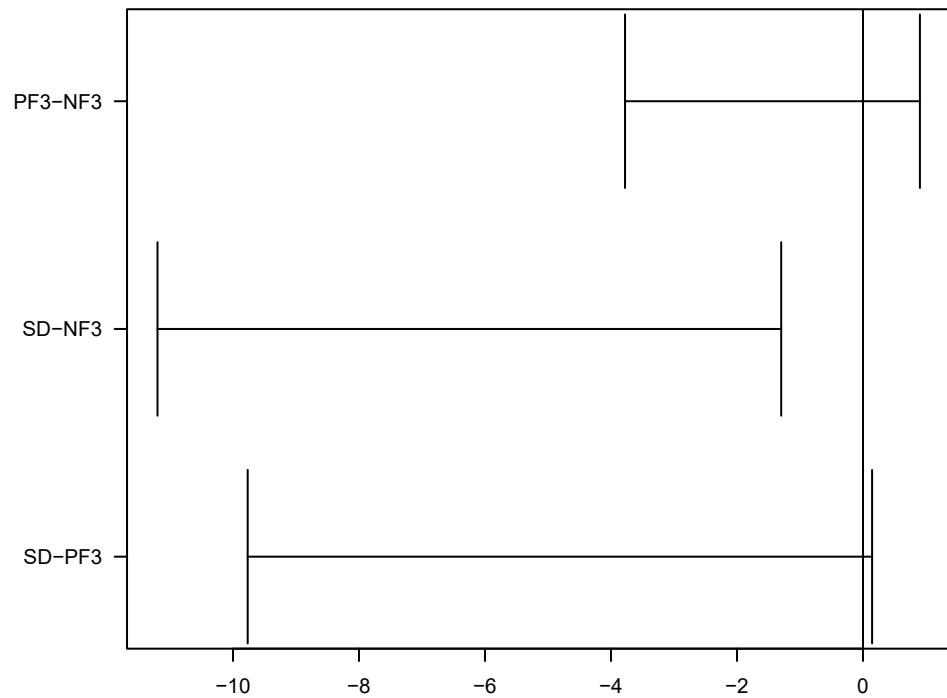

B) 16S

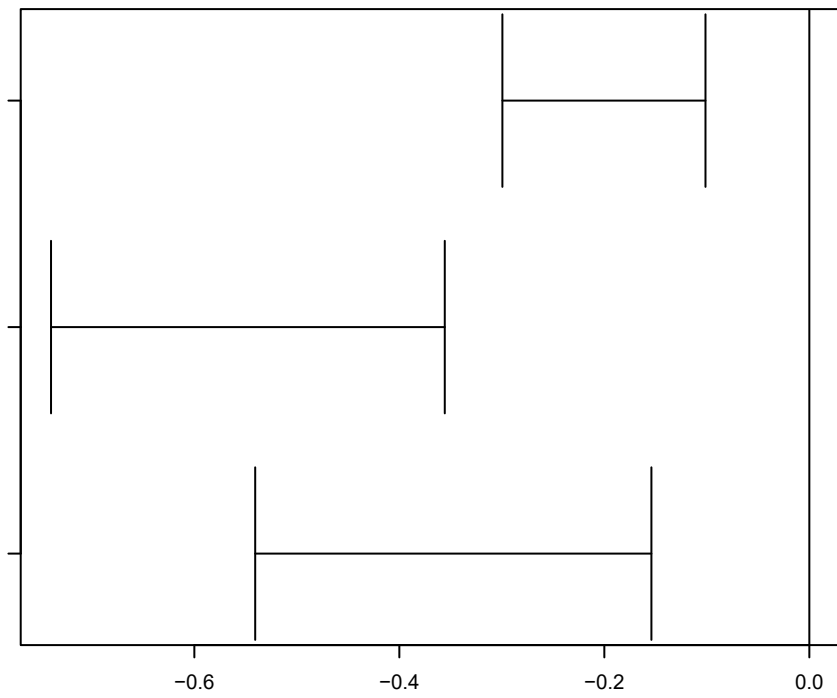

# A) No-freezing Vs Sediment

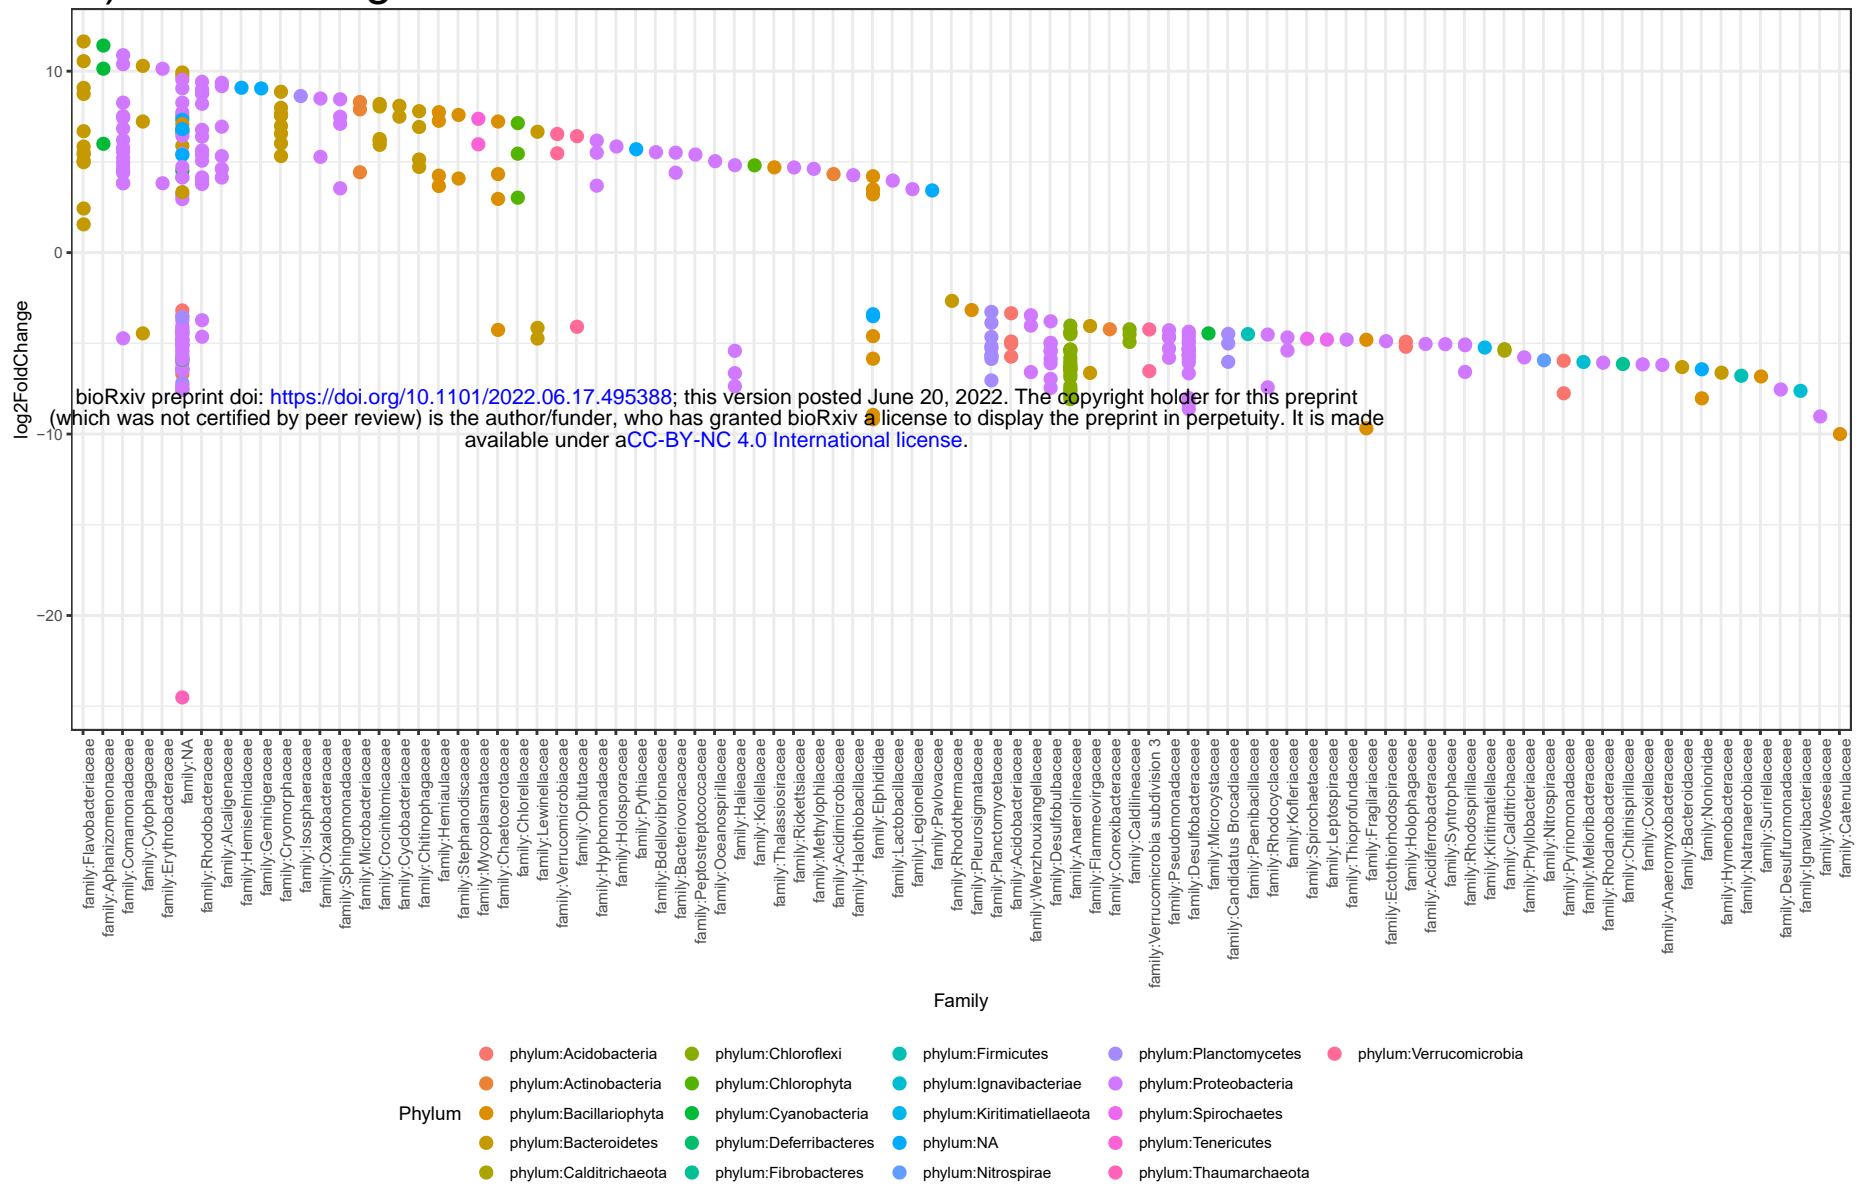

# B) Pre-freezing Vs Sediment

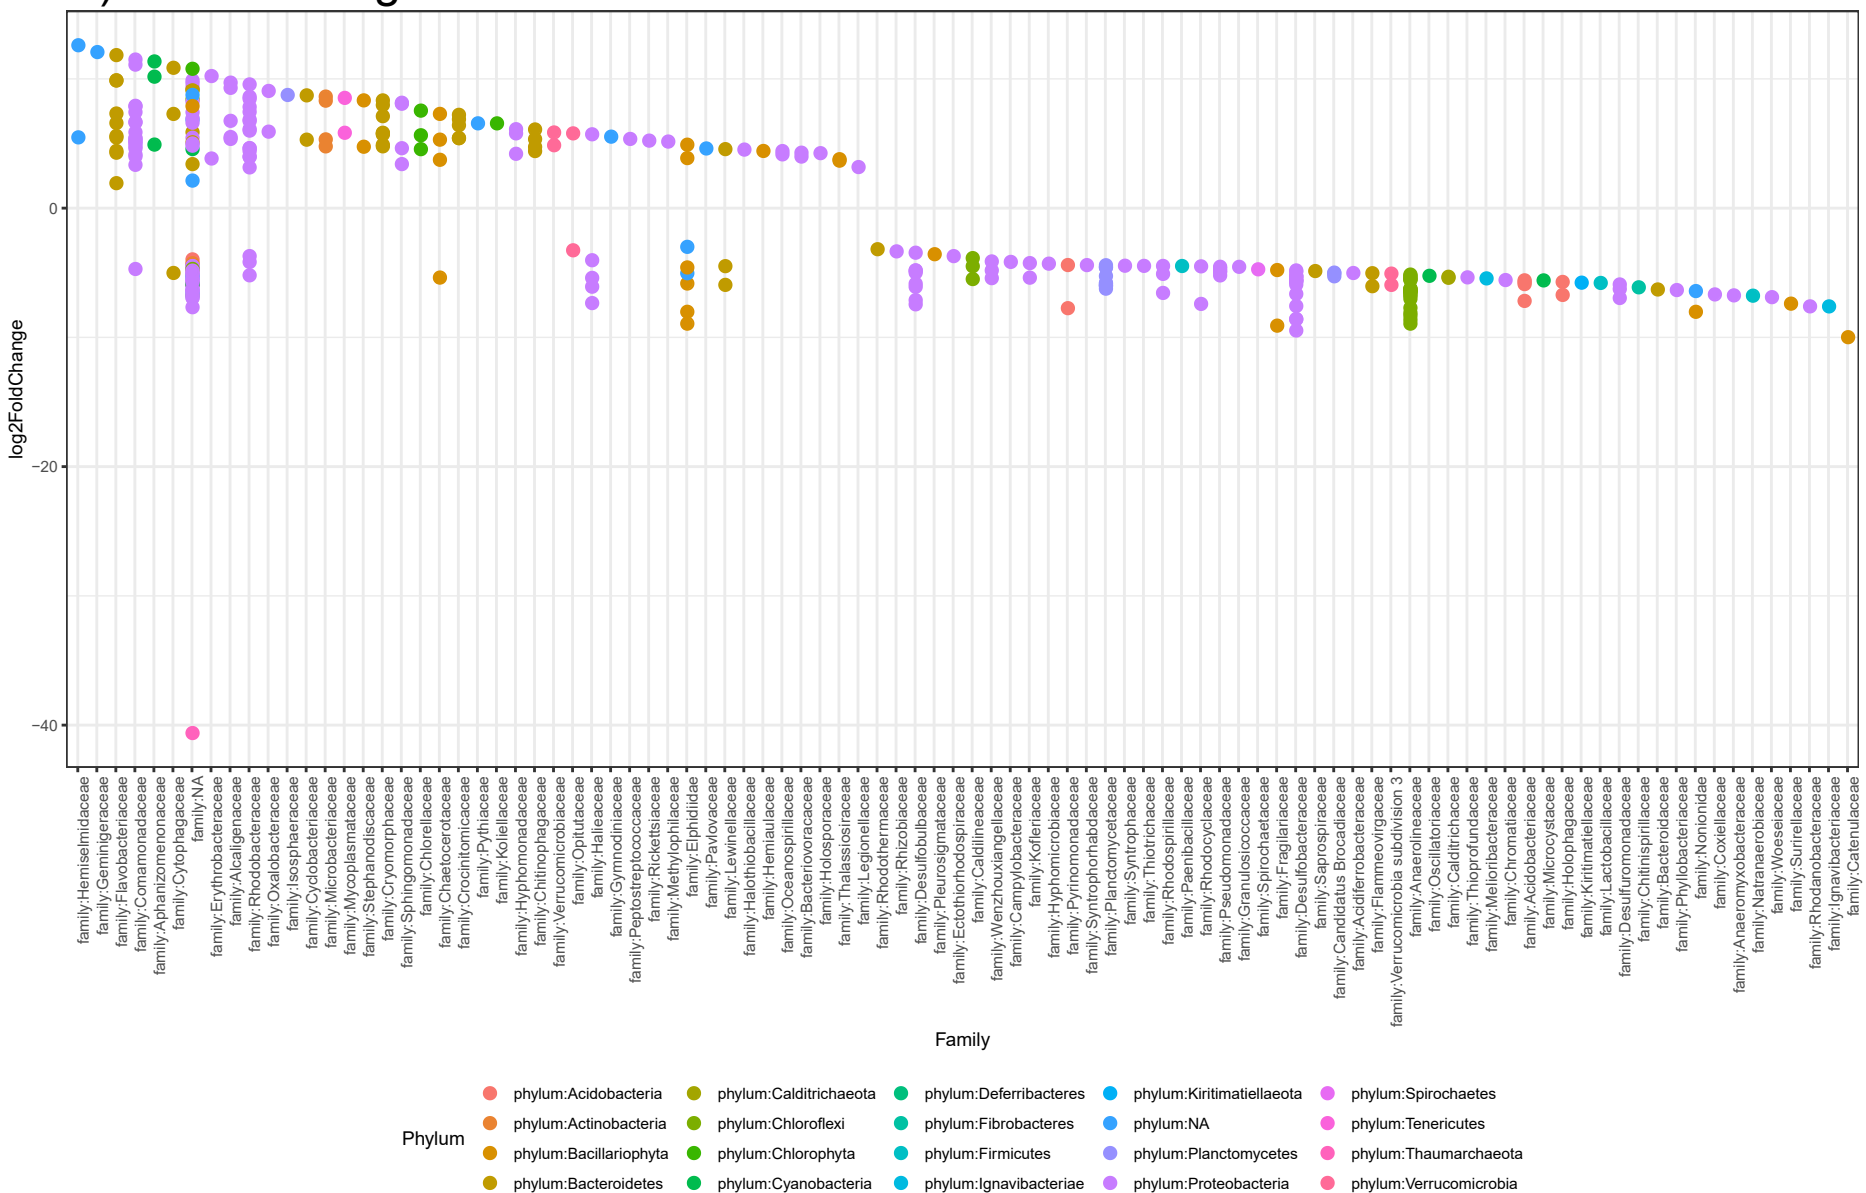

# A) 12S

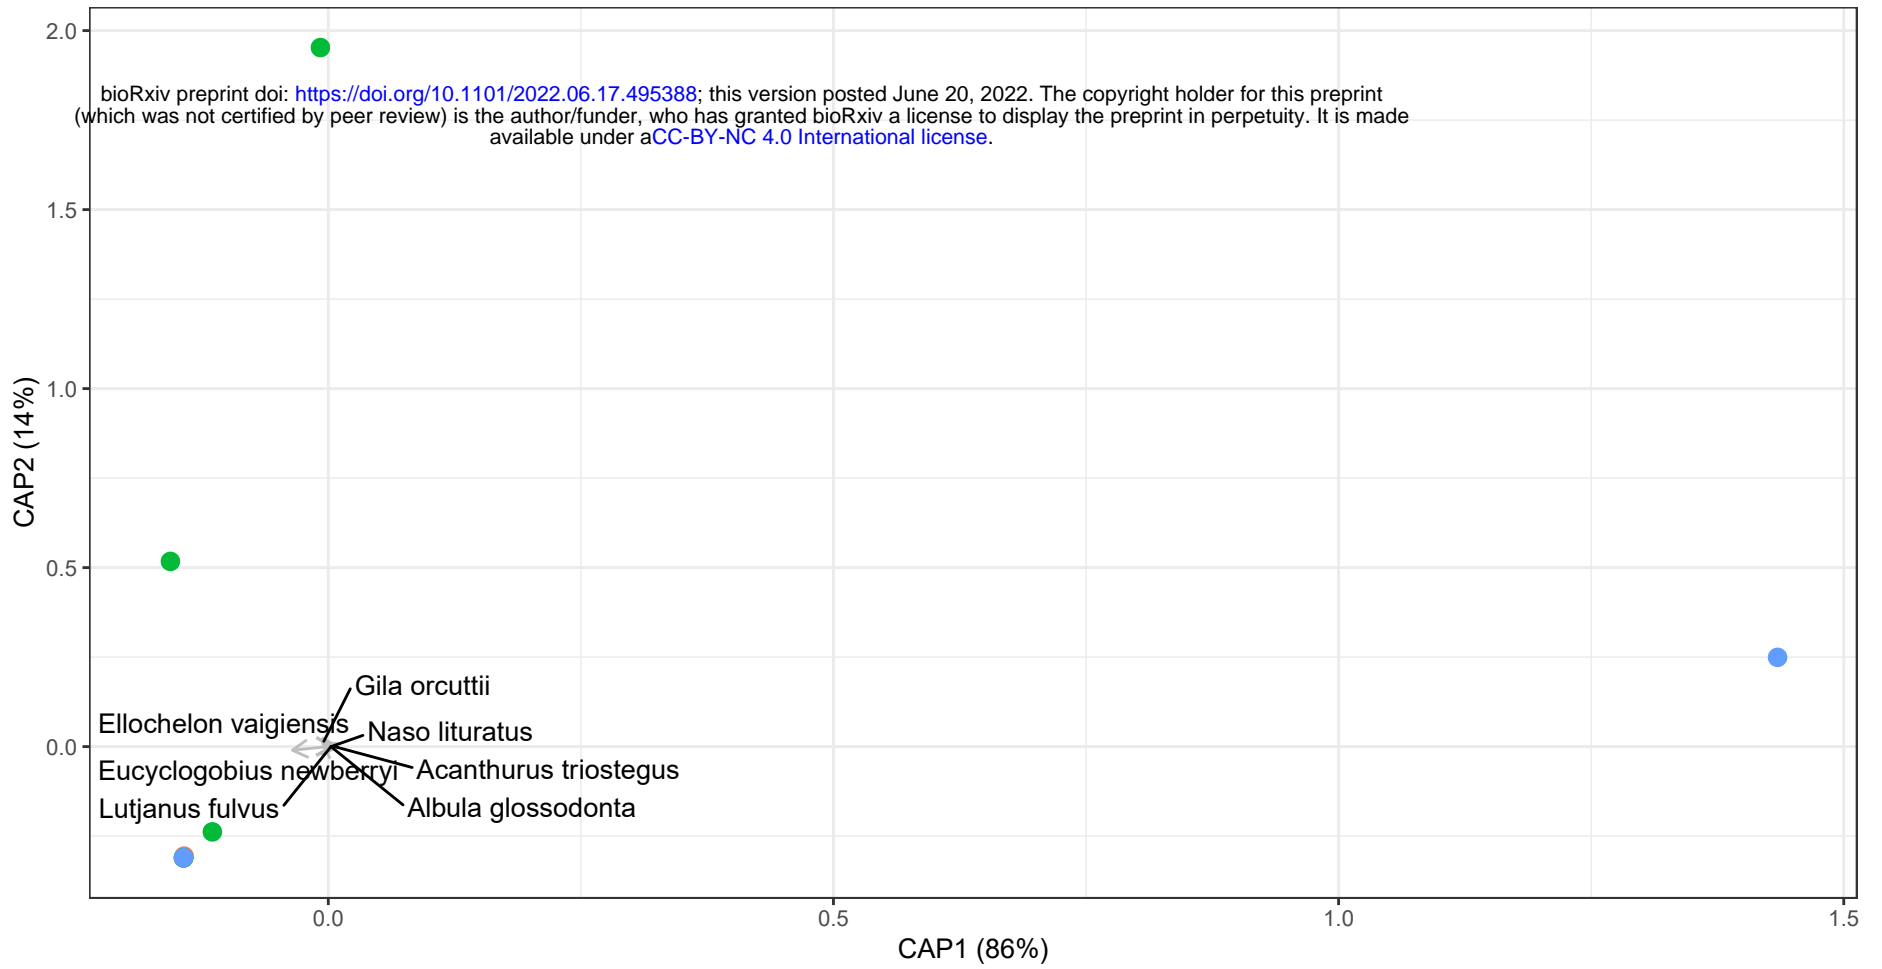

# B) 16S

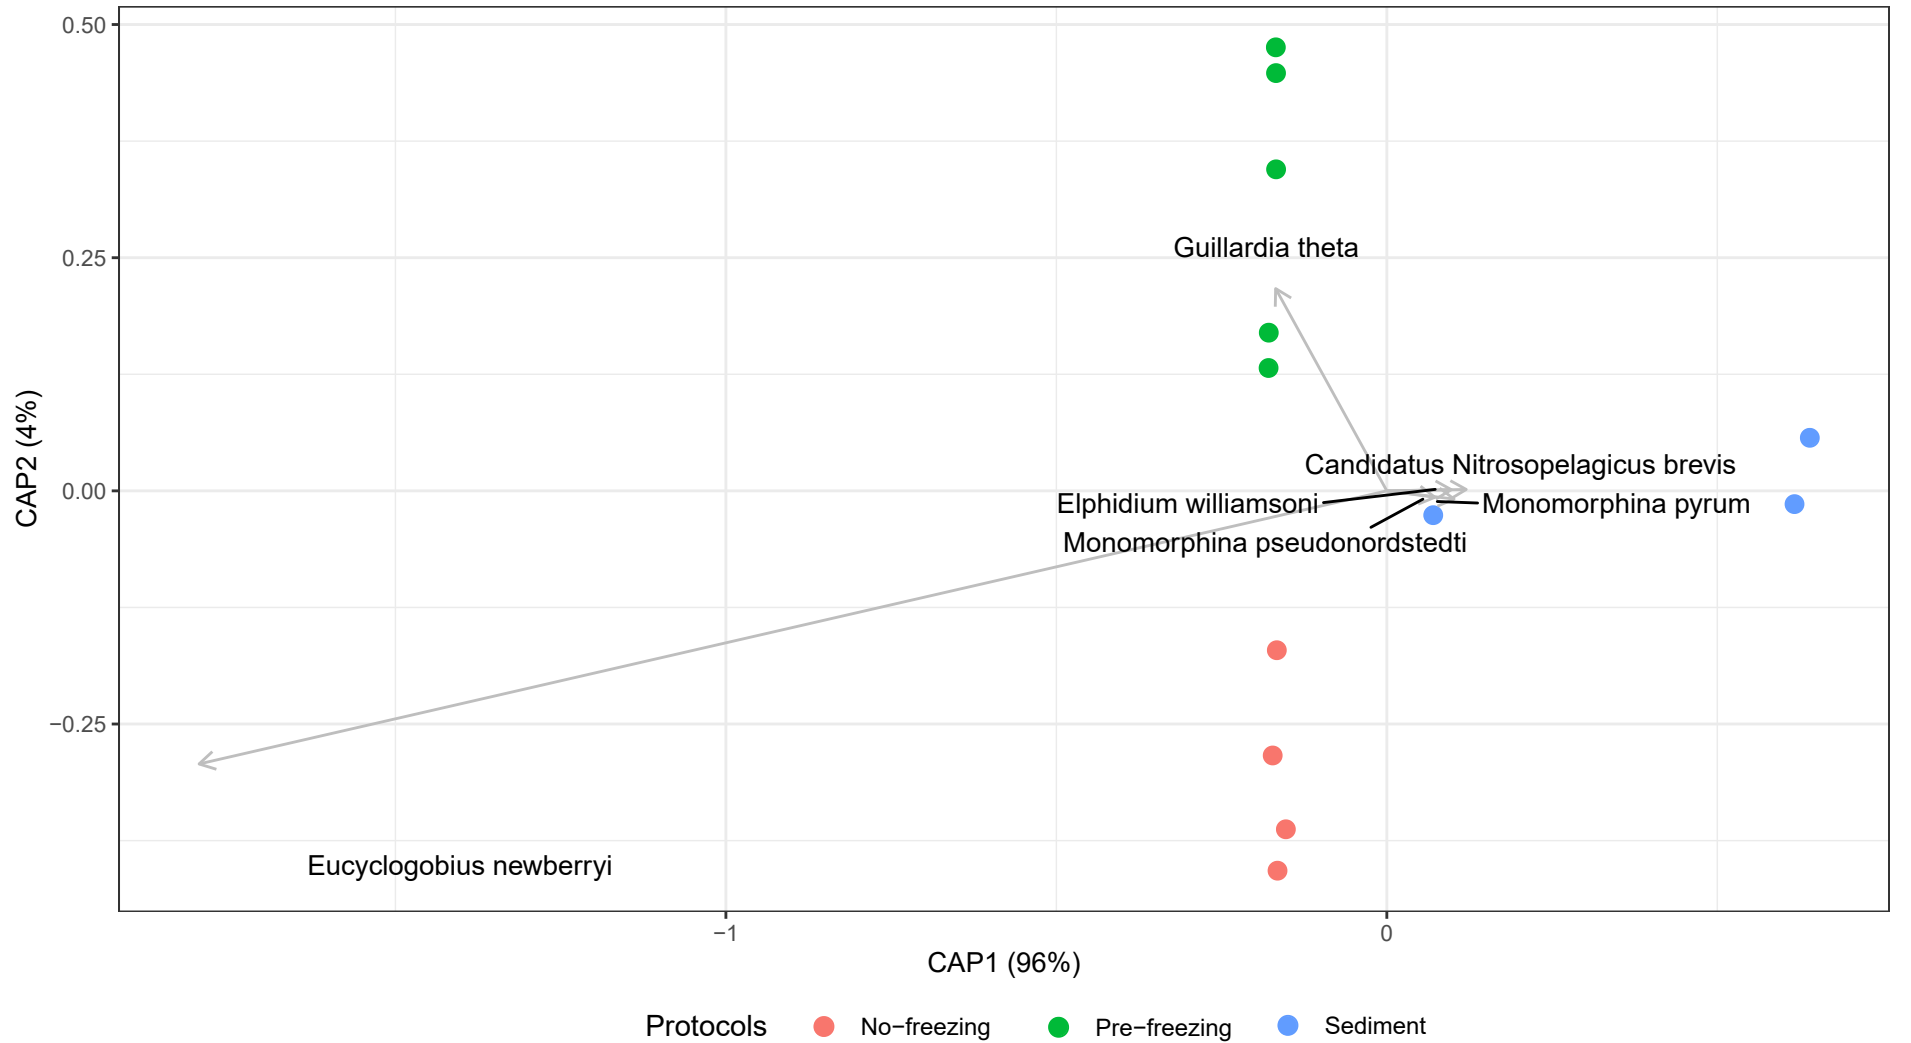

Source: https://www.biorxiv.org/content/10.1101/2022.06.17.495388v1.full.pdf
