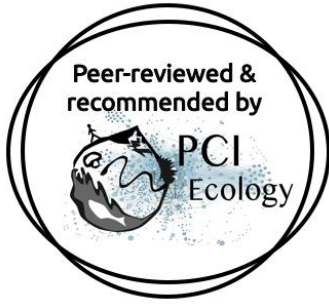

## Different approaches to processing environmental DNA

samples in turbid waters have distinct effects for fish, bacterial and archaea communities.

Authors: Rachel Turba<sup>1\*</sup>, Glory H. Thai<sup>1</sup>, David K. Jacobs<sup>1</sup>

5

6 <sup>1</sup>Department of Ecology and Evolutionary Biology, University of California, Los Angeles,

7 California 90095 USA

8 \*Corresponding author: [rturba@outlook.com](mailto:rturba@outlook.com)

9

10 Keywords: metabarcoding; turbidity; method comparison; fish

### 11 Abstract

12 Coastal lagoons are an important habitat for endemic and threatened species in California that  
13 have suffered impacts from urbanization and increased drought. Environmental DNA has been  
14 promoted as a way to aid in the monitoring of biological communities, but much remains to be  
15 understood on the biases introduced by different protocols meant to overcome challenges  
16 presented by unique systems under study. Turbid water is one methodologic challenge to eDNA  
17 recovery in these systems as it quickly clogs filters, preventing timely processing of samples. We  
18 investigated biases in community composition produced by two solutions to overcome slow  
19 filtration due to turbidity: freezing of water prior to filtration (for storage purposes and long-term  
20 processing), and use of sediment (as opposed to water samples). Bias assessments of community  
21 composition in downstream eDNA analysis was conducted for two sets of primers, 12S (fish)  
22 and 16S (bacteria and archaea). Our results show that freezing water prior to filtration had

23 different effects on community composition for each primer, especially for the 16S, when using a  
24 filter of larger pore size (3 µm). Nevertheless, pre-freezing water samples can still be a viable  
25 alternative for storage and processing of turbid water samples when focusing on fish  
26 communities (12S). The use of sediment samples as an alternative to processing water samples  
27 should be done with caution, and at minimum the number of biological replicates and/or volume  
28 sampled should be increased.

## 29 Introduction

30 Coastal lagoons in California are the numerically dominant form of coastal wetland (Jacobs et  
31 al., 2011; Stein et al., 2014) and are important in many other Mediterranean climates and  
32 subtropical environments. These lagoons are characterized by seasonal and episodic breaching  
33 (opening of the lagoon to the sea, usually by stream flow) and closure (isolation of the lagoon by  
34 a high sandbar), which provide a suite of ecological services: from groundwater infiltration to  
35 support of unique biodiversity (Ballard et al., n.d.). This system serves as important habitat and  
36 nursery for endemic and endangered fishes and amphibians, such as the steelhead  
37 (*Oncorhynchus mykiss*), red-legged frog (*Rana aurora draytonii*), and the tidewater goby  
38 (*Eucyclogobius newberryi*) (Earl et al., 2010; Shaffer et al., 2004; Swift et al., 1993, 2016). Thus,  
39 California lagoons are spatially and temporally variable systems with unique biodiversity and  
40 biodiversity assessment challenges.

41 Coastal lagoons have been drastically reduced in numbers along the California coastline,  
42 driven mostly by the impact of coastal land use for transport structures, agriculture, and  
43 development. These are further exacerbated by ongoing changes in the hydrological cycles due  
44 to climate change (SCWRP, 2018). While these sites are critical for endangered species  
45 conservation, they are also subject to frequent invasion and their response to environmental

46 variation is poorly documented. However, monitoring of this habitat can be limited by a variety  
47 of issues, ranging from limited human power and access to challenges driven by the natural  
48 complexity and dynamism of these lagoons.

49         The use of environmental DNA (eDNA) has been advocated as an alternative for  
50 monitoring communities and target species (Thomsen & Willerslev, 2015), and can overcome  
51 and complement certain field limitations from traditional methods (e.g. seining, trapping). On-  
52 site collection can be relatively fast, and therefore allow field workers to cover more ground. It  
53 can also recover the DNA signal of species that are rare, cryptic and/or hard to capture by  
54 traditional methods, and being non-intrusive, it offers an alternative when working with  
55 endangered species for which permits are necessary (Deiner et al., 2017; Dejean et al., 2012;  
56 Sard et al., 2019). In addition, metabarcoding approaches allow the investigation of multiple  
57 species from a single collection (Taberlet, Coissac, et al., 2012).

58         Nevertheless, it is important to recognize that this approach also brings its own  
59 limitations and biases (van der Loos & Nijland, 2021). In some circumstances, eDNA sampling  
60 can be more expensive than traditional, more established methods (Smart et al., 2016). Since  
61 there are no voucher specimens from collections, contamination is a major issue that needs to be  
62 addressed early on, following best practices in the field (Goldberg et al., 2016). The lack of  
63 voucher specimens also leads to an overdependence on the use of barcodes and genetic databases  
64 for taxonomic identification, which introduces another set of biases, from misidentification to  
65 lack of species representation (Taberlet, Coissac, et al., 2012). Other challenges arise from the  
66 non-universality of sampling methods and downstream processing, with the probability of  
67 detection varying depending on the species and their density, as well as the type of environment,

68 which affects rates of DNA degradation (Deiner et al., 2015; Nagarajan et al., 2022; Rees et al.,  
69 2014; Williams et al., 2017).

70 Coastal lagoons can vary drastically in their environmental properties. One major  
71 challenge is the high and variable turbidity of the water. High turbidity often occurs during high  
72 stream flow, or when lagoons are closed to the ocean by a sandbar leading to an accumulation of  
73 organic and inorganic matter. In this scenario, filtering turbid water on-site is problematic.  
74 However, filtration is widely used for handling water samples (Laramie et al., 2015; Tsuji et al.,  
75 2019). Typically, set volumes of water are run through a small pore size filter to concentrate  
76 DNA before extractions. However, high concentration of fine sediment or organic matter in  
77 water quickly obstructs these filters, making the filtration process time-consuming (although it  
78 could actually aid recovery by binding DNA to suspended particles: Kumar et al., 2022; Liang &  
79 Keeley, 2013; Torti et al., 2015).

80 To overcome this issue, some stakeholders have relied on a tiered filtration step  
81 (prefiltration) to reduce particles and avoid clogging filters (Tsuji et al., 2019), but this approach  
82 increases costs, labor and opportunities for potential contamination (Li et al., 2018; Majaneva et  
83 al., 2018; Robson et al., 2016). The use of filters with bigger pore sizes (up to 20  $\mu\text{m}$ ) has been  
84 previously tested and in cases of turbid waters is generally preferred, but requires filtering larger  
85 volumes of water to capture the same amount of DNA recovered in smaller pore size filters  
86 (Robson et al., 2016; Turner et al., 2014).

87 Freezing water for storage purposes prior to filtration can mitigate the issue of slow  
88 filtration in the field and allow it to be done in batches in the laboratory at a later time, but this  
89 type of sample storage could also introduce bias on eDNA capture and community composition  
90 (Kwambana et al., 2011; Sekar et al., 2009). Freezing can disrupt cells and extrude their DNA in



91 the environment, which would then make it easier for it to pass through the filter pores and be  
92 lost, an issue that has been demonstrated in certain cases (e.g. Suomalainen et al., 2006).  
93 Increasing the pore size of filters to speed the filtration process could worsen this problem by  
94 letting DNA in solution flow through the pores more easily.

95         When dealing with turbid waters, some stakeholders have opted to use the centrifugation  
96 approach (e.g. Williams et al., 2017). Extracellular DNA (i.e. DNA not contained within a cell  
97 wall) can be bound to particles (Torti et al., 2015) and consequently be captured and detected  
98 following centrifugation of particles into pellets. However, the amount of water used is limited  
99 by centrifuge size, usually around 15-30 mL per replicate (Doi et al., 2017; Ficetola et al., 2008),  
100 which might limit recovery of diluted DNA (Deiner et al., 2015).

101         Processing sediment samples may be preferable to processing highly turbid water  
102 samples. However, it is important to understand how DNA recovery from these different media  
103 compare to one another. Turner et al. (2015) and Perkins et al. (2014) have shown that sediment  
104 can have a higher concentration of fish eDNA and some bacteria, respectively. This may relate to  
105 the organic-particle binding and sinking properties, and longer persistence of DNA in sediment  
106 compared to water samples. However, as is the case with water samples, there is no consensus on  
107 the rate of degradation of eDNA in soil and sediment (Dell'Anno & Corinaldesi, 2004; Levy-  
108 Booth et al., 2007; Torti et al., 2015), and this will depend on multiple local biotic and abiotic  
109 factors. In addition, biological communities can naturally differ between water column and  
110 sediments, even when we expect some level of overlap due to both DNA sinking and suspension.

111         Previous works have compared different approaches to processing eDNA, including  
112 assessment of filtration and storage methods (Hinlo et al., 2017; Takahara et al., 2015),  
113 comparisons between water and sediment eDNA recovery (Sales et al., 2019; Turner et al.,

114 2015), as well as some work on turbid waters (Kumar et al., 2022; Robson et al., 2016; Williams  
115 et al., 2017). But results have been contradictory, or limited to looking at just DNA  
116 concentration, or at a single targeted species.

117         The goal of the present study is to compare how freezing water prior to filtration and  
118 using water versus sediment samples induce and/or exacerbate biases in taxa detection for a set  
119 of universal primers targeting different biological communities—12S (fish) and 16S (bacteria and  
120 archaea)—in coastal lagoons. By understanding the biases introduced when processing  
121 environmental samples, we will be able to inform decisions regarding experimental design for  
122 monitoring such a dynamic and challenging habitat, which has invaluable importance for the  
123 maintenance of ecosystem services for both wild and urban populations. We expect these results  
124 will be of interest relative to eDNA sampling in other aquatic systems as well, such as rivers,  
125 streams, and ponds, especially those with turbid waters.

## 126 Material and Methods

### 127         Site - Topanga Lagoon

128 To determine the variability of species detection for each protocol, water and sediment samples  
129 were collected from a south-facing coastal lagoon in southern California, located in Malibu, a  
130 stretch of coast that runs from Santa Monica to Point Mugu. This lagoon is part of the Topanga  
131 State Park and is currently undergoing plannings for restoration. It is the only lagoon on this  
132 stretch of coast that still harbors a stable population of tidewater goby (*E. newberryi*), a federally  
133 endangered species, and is relatively less impacted than other lagoons in the same region. The  
134 endangered southern steelhead trout (*O. mykiss*) is also found in this system during anadromy  
135 when the lagoon is breached. Due to the presence of these species, Topanga lagoon has been  
136 periodically surveyed by the Jacobs' lab members and collaborators such as researchers at the

137 Resource Conservation District of The Santa Monica Mountains (RCDSMM), and therefore its  
138 macrobiota is regularly studied, especially the fish fauna. The lagoon was sampled on September  
139 6th, 2018, at the end of the Summer season, and as is typical of this time of the year, the weather  
140 was dry with no record of precipitation since June (WeatherSpark.com, n.d.). The lagoon was  
141 closed to the ocean by a sandbar and the water was murky (Fig. 1), which in the author's  
142 experience, such turbidity slowed filtration and easily clogged 0.45  $\mu\text{m}$  cellulose nitrate filters.

#### 143 Protocols and samples

144 A sterilized water jug was used to collect a single water sample in the lagoon, at a mid-point  
145 between the mouth margin and the road bridge (Fig. 1). The sample was then placed on ice and  
146 brought to the laboratory (~1 hr car ride). This method of “grab-and-hold” has proven to be  
147 similarly effective as on-site filtration in a previous study (Pilliod et al., 2013). Once in the  
148 laboratory, the total volume was divided for two separate protocols: centrifugation; and filtration.

149 The centrifugation protocol followed Doi et al. (2017) using five replicates of 50 mL  
150 tubes (with 27 mL water samples each). Besides extracting the pellet, we also included a  
151 filtration step of the supernatant using a 0.45  $\mu\text{m}$  filter. For the filtration protocol, water was  
152 separated into ten 500 mL bottles (Fig. 2) and these were used in two separate protocols. Half  
153 (i.e. five bottles) were frozen in the  $-20^{\circ}\text{C}$  for three days before thawing for filtration (hereafter  
154 referred to ‘pre-freezing (PF) protocol’), and half was not frozen and immediately filtered  
155 (hereafter referred to ‘no freezing (NF) protocol’). Filtration was done in two sequential steps for  
156 both treatments (pre- and no freezing) using an adapted vacuum pump in the pre-PCR room of  
157 the laboratory (Fig. S1). First, the water sample was filtered using a 3  $\mu\text{m}$  filter, then the filtrate  
158 was passed through a 0.45  $\mu\text{m}$  filter. All filters used in this work were cellulose nitrate. Here,

159 however, we will focus only on the results from the first filtration step of the water filtration  
160 protocol (3  $\mu\text{m}$  filters). More details on that are further explained in the supplemental material.

161 Surficial sediment (within the first 5 cm) was also collected at the same location where  
162 water was sampled (hereafter referred to ‘sediment (Sed) protocol’). We used five collection kits,  
163 and each kit consisted of three 2 mL tubes (15 tubes total). Subsamples of these were pooled in  
164 triplicates prior to DNA extraction following instructions as defined by the CALeDNA program  
165 (<https://ucedna.com/methods-for-researchers>). These were also kept on ice during field work and  
166 stored in a  $-80^{\circ}\text{C}$  freezer upon arrival at the laboratory until DNA extractions.

167 In order to test if freezing water is a viable process to store and manage water samples,  
168 we compared the results of pre-freezing water prior to filtration with the no freezing protocol.  
169 Results from the sediment protocol were compared against both filtration protocols: (pre-  
170 freezing versus no freezing) to test if sediments can be used as an alternative to water samples.

#### 171 DNA Extraction

172 DNA from sediments and filters were extracted following the PowerSoil extraction protocol.  
173 Filters were chopped into thin strips before being added to the bead tubes, and sediment  
174 triplicates were pooled in small batches to reach 0.25-0.3 g before processing. We used the soil  
175 extraction kit on the filters as well to reduce potential PCR inhibition caused by the water  
176 turbidity (Kumar et al., 2022), but also to limit the number of variables in the research design by  
177 adding another extraction protocol.

#### 178 Contamination best practices

179 Care was taken to avoid contamination both in the field and the lab. Before collection, bottles  
180 and the water jug were cleaned and bleached and then handled with clean gloves on site.  
181 Extractions and PCR were done in a separate pre-PCR room. Utensils and bench top were

182 cleaned with 10% bleach, followed by 70% ethanol. Forceps and scissors for handling filters  
183 were seared and cleaned with bleach and ethanol after dealing with each sample. PCR reagents  
184 were prepared in a clean, PCR-free, positive pressure hood. Sediment samples were collected  
185 with new 2 mL cryotubes and following field protocol as recommended by the CALeDNA  
186 program. Blanks were made for the field collection, laboratory filtration and PCR (5 blanks in  
187 total) and included in the library for sequencing.

## 188 Sequencing

189 Library preparation followed CALeDNA protocols ([https://ucedna.com/methods-for-](https://ucedna.com/methods-for-researchers)  
190 [researchers](https://ucedna.com/methods-for-researchers)). Metabarcoding libraries were generated for bacteria and archaea (16S rRNA), fish  
191 (12S rRNA) and metazoans (CO1). Sequences for each primer can be found at Table 1. All  
192 libraries consisted of triplicate PCR reactions. PCR products were visualized using gel  
193 electrophoresis, and for each barcode, PCR triplicates were pooled by sample. After bead  
194 cleaning, all markers were pooled by sample and tagged for sequencing (single indexing).  
195 Libraries were pooled and run on a MiSeq SBS Sequencing v3 in a pair-end 2x300 bp format  
196 [Technology Center for Genomics & Bioinformatics (TCGB), UCLA] with a target sequencing  
197 depth of 25,000 reads/sample/metabarcoding. Two sequencing runs were conducted, but the CO1  
198 primer was still below the sequencing depth threshold and therefore its results will not be  
199 discussed here (see Figs. S2-3). For each run, our library was pooled with different samples from  
200 different collaborators to maximize efficiency of the sequencing run.

## 201 Bioinformatics and data pre-processing

202 Sequence data was bioinformatically processed in Hoffman2, the High Performance Computing  
203 cluster at UC Los Angeles, using the Anacapa Toolkit (Curd, Gomer, et al., 2018) with default  
204 settings. Briefly, reads are demultiplexed and trimmed for adapters (cutadapt, Martin, 2013) and

205 low-quality reads (FastX Toolkit, *FASTX-Toolkit*, n.d.). Dada2 (Callahan et al., 2016) is used to  
206 denoise, dereplicate, merge and remove chimeras, and the resulting clean Amplicon Sequence  
207 Variants (ASVs) have their taxonomy assigned using Bowtie2 (Langmead & Salzberg, 2012),  
208 matched to a custom reference library (CRUX, Curd, Kandlikar, et al., 2018). Confidence levels  
209 are determined by the BLCA algorithm (Gao et al., 2017) to generate a table of best taxonomic  
210 hits, from super-kingdom to species level. The pipeline was designed to process not only paired,  
211 but also unmerged and unpaired reads.

212 Taxonomic tables with a bootstrap confidence cutoff score of 0.6 were used for  
213 downstream analyses. Except when noted, all bioinformatic analyses mentioned beyond this  
214 point were performed using R v.3.6.2 (R Core Team, 2018) in RStudio v.1.2.1335 (RStudio  
215 Team, 2020). Decontamination was done separately for each primer set and each run (since the  
216 dataset was pooled with different combinations of samples for sequencing). We used the package  
217 metabar (Zinger et al., 2020) to lower tag-jumping and remove contaminants through detection  
218 of ASVs whose relative abundance is highest in negative controls. We also ran a modification of  
219 the gruinard pipeline ([https://github.com/zjgold/gruinard\\_decon](https://github.com/zjgold/gruinard_decon)), including only steps 4 (site  
220 occupancy modeling) and 5 (dissimilarity between replicates), since previous steps were  
221 redundant with the metabar decontamination steps. Lastly, taxa classified as "Not\_found",  
222 "Unclassified", "*Canis lupus*", "*Bos taurus*", and "*Homo sapiens*" were removed from the final  
223 tables before being merged and used in downstream analyses.

## 224 Diversity analysis

225 We used the laboratory's own sampling record and the Global Biodiversity Information Facility  
226 database (Gbif.Org, 2022) to manually check the 12S primer final taxonomic table. The number  
227 of species captured by each protocol was visualized using Venn Diagrams (package

228 VennDiagram, Chen, 2018). Species rarefaction curves were made for each metabarcode to  
229 inspect the level of species saturation in each protocol replicate. The slope of each curve was  
230 calculated using the rareslope function in the vegan package (Oksanen et al., 2019), and the  
231 confidence interval was calculated using pairwiseCI (Schaarschmidt & Gerhard, 2019) with  
232 confidence level at 95%. Rarefaction curves were plotted using the ggrare function from the  
233 ranacapa package (using step = 5).

#### 234 Differential abundance

235 The raw dataset was analyzed using DESeq2 and ALDEx2 to look at differential abundance  
236 between protocols (Fernandes et al., 2013; Love et al., 2014), and the output of both analyses  
237 were compared to look for consistency in results. While DESeq2 uses a series of negative-  
238 binomial generalized linear models to count data and estimate the log<sub>2</sub>-fold change in  
239 abundance, ALDEx2 (ANOVA-like Differential Expression) accounts for community  
240 composition when calculating differential expression by performing a scale invariant  
241 transformation on read counts, which are modeled as distributions of posterior probabilities  
242 sampled from a Dirichlet distribution. This method has been found to produce more consistent  
243 and reproducible results (Nearing et al., 2022).

244 For DESeq2, the default testing framework was used (test = “Wald”, fitType =  
245 “parametric”), which includes the Benjamini-Hochberg multiple inference correction. The  
246 sfType option was defined as poscounts since this estimator is able to handle zeros. The log<sub>2</sub>  
247 fold change of each pairwise comparison for which there were significant differences in  
248 abundances was plotted. For ALDEx2, we performed a two sample T-test for each pairwise  
249 comparison: between the different filtration protocols (pre- versus no freezing), and between  
250 each filtration protocol and sediment protocol (i.e. PF vs. Sed; and NF vs. Sed). We used 500

251 Monte Carlo samples (`mc.samples = 500`) for estimation of the posterior distribution. We plotted  
252 both the between- (M) versus within-condition fold change (W) (MW) and Bland-Altman (BA)  
253 plots using the `aldex.plot` function.

#### 254 Beta diversity

255 For the beta diversity analysis, samples were standardized by using either the eDNA index  
256 (Kelly et al., 2019) or by rarefying them as a way to equalize sequencing effort and minimize  
257 stochasticity and bias. For the eDNA index, we followed the Wisconsin double standardization  
258 method in the `vegan` package. The `custom_rarefaction` function in the R package `ranacapa`  
259 (Kandlikar, 2020) was used to rarefy the dataset with 10 replicates.

260 For the 12S primer, samples were rarefied to 20 000 reads. Three sediment replicates  
261 were excluded due to very low read numbers (<100). For the 16S, samples were rarefied to  
262 15 000 and one sediment replicate that had ~5000 reads was excluded. The number of reads per  
263 taxa for each protocol replicate was plotted using the `phyloseq` package (McMurdie & Holmes,  
264 2013), for both the raw and rarefied dataset.

265 The rarefied dataset followed a Constrained Analysis of Principal Coordinates (CAP)  
266 using the `capscale` function in `vegan` and Bray-Curtis distance. This ordination method, which  
267 can be used with non-Euclidean dissimilarity indices, explains the ordination of assemblage  
268 composition based on species abundances. The difference in community composition for each  
269 treatment was then analyzed using a PERMANOVA and Bray-Curtis dissimilarity, followed by a  
270 pairwise PERMANOVA comparison (all with the `vegan` package). P-values were adjusted using  
271 the FDR (False Discovery Rate) approach.



## 272 Results

### 273 Sequencing

274 The first run generated a total of 6 407 371 reads: 3 817 216 reads for the 12S primer, 2 393 627  
275 for 16S, and 196 528 for CO1. In the second run there were a total of 9 088 496 reads: 6 685 673  
276 reads for the 12S metabarcode, 1 904 283 reads for 16S and 498 540 for the CO1. For the 12S  
277 and 16S primers, we were able to reach our threshold of 25 000 reads/sample in most cases,  
278 while that was not the case for all except one sample of the CO1 primer. Because of this  
279 limitation on the number of reads/sample, the CO1 metabarcode will not be discussed further in  
280 the main paper (but check the supplemental material for more details).

### 281 Bioinformatics and data pre-processing

282 The number of reads per sample after decontamination and combining both runs is illustrated in  
283 Figure S3. We manually checked the final taxonomic tables of each separate run for the 12S  
284 primer to look for signs of contamination and evaluate how well the bioinformatic  
285 decontamination steps worked (metabaR and gruinard). The taxonomic tables for the 12S primer  
286 have substantially less species than the 16S, and the local fish fauna is relatively well known,  
287 making the process more tractable.

288 For the run that was pooled with samples from Palmyra Atoll, the output still retained  
289 some tropical reef and pelagic fish and elasmobranch species that are not found in coastal  
290 lagoons in California. We can expect that tag-jumping contamination is also present in the other  
291 sequencing runs and primers as well. Interestingly, eight out of 28 of those tropical species (ca.  
292 28%) were found exclusively on the sediment protocol and not the filtration protocols (e.g.  
293 *Acanthurus achilles*, *Scarus altipinnis*, *Lutjanus russellii*).

294 Barplots for both the raw and rarefied dataset (Figs. S3-4, respectively) show that  
295 sediment replicates had greater variability amongst themselves, both in number of reads and  
296 community composition, compared to the replicates of either filtration protocols. Water  
297 replicates were more consistent within and between protocols, and had an overall higher number  
298 of reads than the sediment replicates.

### 299 Diversity

300 After the decontamination steps (metabaR and gruinard) and removing specific, uninformative  
301 ASVs (as listed above), the total number of species assigned to 12S was 39, distributed in 20  
302 orders and 22 families. Of these 39 species, only four had been previously recorded for the site  
303 (Table S1). For 16S, the total number of taxa assigned to species was 2 625, distributed in 45  
304 phyla and 335 families.

305 We also noticed some dubious taxonomic assignments. For example, for the 12S primer,  
306 we had one hit for *Fundulus diaphanus*, which is a species of killifish native to the northeast of  
307 North America. However, the californian species *F. parvipinnis* has been previously documented  
308 in Topanga by lab members sampling at the site. Similarly, there were two hits for *Phoxinus*  
309 *phoxinus*, which has a European distribution with a closely related North American counterpart,  
310 *P. eos*, although this species has not been identified in collections from Topanga lagoon. Another  
311 dubious identification occurred for two species of *Odontesthes*, *O. incisa* and *O. smitti*, which  
312 were among the most abundant hits in our dataset but are native to the southwest Atlantic. These  
313 two species, however, are South American relatives of topsmelt (*Atherinops affinis*), commonly  
314 found in coastal lagoons and estuaries in California (Table S1).

315 The Venn Diagram (Fig. 3) shows that even though the sediment protocol had lower  
316 numbers of reads overall (Figs. S2-3), they had the highest number of species recovered (12S

317 primer: N=27, 19 unique; 16S primer: N=1 929, 1 178 unique). The species overlap between  
318 protocols for the 12S was only 1.2% (n=1), and for the 16S primer it was 3.5% (n=402).

319 Species rarefaction curves also show that the sediment protocol is further from reaching  
320 saturation compared to both filtration protocols, for both the 12S and 16S primers (Fig. 4),  
321 although there was more variation between the replicates for the 12S sediment protocol. For the  
322 12S primer, there is a significant difference in the slope of the species curves between the  
323 sediment and no freezing protocols (Fig. 5, Table 2), while for the 16S, all pairwise comparisons  
324 showed significant differences.

### 325 Differential Abundance

326 In the DESeq2 analysis, there was no significant difference between species abundance for the  
327 12S primer in any of the protocols' pairwise comparisons. In ALDEx2, the tidewater goby (*E.*  
328 *newberryi*) was the only species with an effect size > 1 in the comparisons of filtration protocols  
329 (NF and PF) against the sediment protocol, being underrepresented in the latter (Fig. 6). The  
330 proportion of overlap of the 95% CI of the effect size was not zero, but they were small  
331 nonetheless (NF: 0.010; PF: 0.014) (Table S4).

332 In the case of the 16S primer, the DESeq2 analysis showed no significant difference in  
333 comparison between the filtration protocols (NF versus PF). However, there were significant  
334 differences in the pairwise comparisons between filtration protocols and sediment protocol (NF  
335 vs. Sed; PF vs. Sed; Fig. 6, Tables S2-3). The five most differentially abundant species with  
336 highest abundance in the filtration protocols, relative to the sediment, were representatives of the  
337 families Aphanizomenonaceae, Comamonadaceae and Flavobacteriaceae (in both NF and PF  
338 comparisons); and Hemiselmidaceae and Geminigeraceae (PF protocol only). These comprise

339 groups of cyanobacteria (Aphanizomenonaceae) and algae (Hemiselmidaceae and  
340 Geminigeraceae), as well as environmental bacteria (Comamonadaceae and Flavobacteriaceae).

341 The most differentially abundant species with highest abundance in the sediments were  
342 representatives of the families Catenulaceae, Fragilariaceae and an archaea assigned to the  
343 Thaumarchaeota phylum (in both NF and PF comparisons); plus Woeseiaceae and Elphidiidae  
344 (NF protocol only); and Anaerolineaceae and Desulfobacteraceae (PF protocol only). These  
345 comprise groups of diatoms (Catenulaceae and Fragilariaceae), environmental bacteria  
346 (Woeseiaceae, Anaerolineaceae and Desulfobacteraceae) and archaea (Thaumarchaeota), and  
347 foraminiferans (Elphidiidae).

348 In the ALDEx2 analysis, there were many species that showed an effect size  $> 1$  (Fig. 8),  
349 but only a few showed proportions of overlap  $< 0.001$  (none in the NF versus PF comparison)  
350 (Table S5). For the species that fall within these criteria (effect  $> 1$ , overlap  $< 0.001$ ), in the  
351 comparisons between filtration protocols and sediment protocol (NF vs. Sed; PF vs. Sed), there  
352 were 61 species overrepresented in the NF protocol compared to 39 in the sediment; and 73  
353 species overrepresented in the PF protocol compared to the sediment (there was no species  
354 overrepresented in the sediment that met the criteria above) (Table S5). Taxa overrepresented in  
355 both filtration protocols (NF and PF) relative to sediment are in the families Comamonadaceae,  
356 Flavobacteriaceae and Rhodobacteraceae. Both Comamonadaceae and Flavobacteriaceae were  
357 also represented in the DESeq2 results and comprise groups of environmental bacteria.  
358 Rhodobacteraceae are heterotrophic bacteria usually found in association with algae in marine  
359 environments (Bischoff et al., 2021). In the NF protocol, Cryomorphaceae is the most  
360 represented family, with seven species, and comprises aquatic bacteria generally found in  
361 locations rich in organic carbon (Bowman, 2014).

362 In the sediments, when compared to the NF protocol, the most overrepresented family is  
363 the Anaerolineaceae with 12 species, followed by Desulfobacteraceae (5), Nonionidae (2) and  
364 Elphidiidae (2). Anaerolineaceae, Desulfobacteraceae and Elphidiidae were also found in the  
365 DESeq2 results. The first two comprise environmental bacteria, while the latter is a family of  
366 foraminiferans (such as the Noniodidae family).

### 367 Beta diversity

368 For the rarefied dataset, there were no discernible differences in assemblage composition in the  
369 CAP analysis for the 12S primer (Fig.9A). One sediment replicate is driving most of the  
370 difference (CAP1=86%) with the overrepresentation of many tropical species, likely tag-jump  
371 contaminants. The PERMANOVA result showed a relatively weak effect overall ( $R^2 = 0.38$ ;  $p =$   
372  $0.05$ ), with the pairwise test showing a relatively weak effect for the NF versus PF comparison  
373 ( $R^2 = 0.20$ ), followed by stronger effects in the sediment comparisons (NF vs. Sed:  $R^2 = 0.41$ ; PF  
374 vs. Sed:  $R^2 = 0.31$ ) (Table 3). The lack of significant differences between the filtration and  
375 sediment protocols could have been driven by the loss of three sediment replicates when  
376 rarefying the dataset.

377 When using the eDNA index, the CAP analysis for the 12S primer showed that many of  
378 the species driving the differences in assemblage composition were the tropical species that are  
379 coming from the tag-jumping contamination (Fig. S5A). For example, we see overrepresentation  
380 in the sediment protocol of *Stegastes nigricans* and *Caranx melampygus*; and in the NF protocol,  
381 *Sphyraena barracuda*. Nevertheless, we also see some other species that are known to be found in  
382 the lagoon, such as the *Eucyclogobius newberryi*, being mostly overrepresented in the filtration  
383 protocols (NF and PF) compared to the sediments; and *Gila orcutii*, overrepresented in the NF  
384 protocol. Two species of dubious taxonomic assignment are also overrepresented in the

385 sediment: *Phoxinus phoxinus* (as discussed in the previous ‘Diversity’ section); and  
386 *Acanthogobius flavimanus*, which is a species of goby native to Asia, but that has been recorded  
387 previously in California estuaries (Nico et al., 2022). The PERMANOVA result showed a  
388 weaker effect than in the rarefied dataset ( $R^2 = 0.21$ ;  $p = 0.055$ ), including for the pairwise  
389 comparisons (Table 4).

390 For the rarefied 16S primer dataset, the different protocols showed discernible differences  
391 in assemblage composition in the CAP analysis. The first axis explains most of the total variation  
392 (CAP1=96%), with the tidewater goby being the most underrepresented in the sediment  
393 compared to the filtration protocols (NF and PF), especially in the NF protocol (Fig. 9B). The  
394 sediment protocol was also slightly overrepresented by a few other species. One of them was  
395 identified as *Nitrosopelagicus brevis*, a species of uncultured “Candidatus”, ammonia-oxidizing  
396 archaea (Thaumarchaeota) found mainly in the epi- and upper mesopelagic environments of the  
397 open oceans (Santoro et al., 2015). There are also two species of *Monomorpha*, (*M. pyrum* and  
398 *M. pseudonordstedti*) that belong to the Euglenaceae family, a group of eukaryotic flagellates  
399 found in freshwater environments. Lastly, there is *Elphidium williamsoni*, a foraminifera  
400 belonging to the family Elphidiidae found in tidal flats of the North Sea. CAP2 identifies the  
401 variation (14%) differentiating the filtration protocols, with the most distinguishing species being  
402 the *Guillardia theta*, a species of flagellate algae belonging to the family Geminigeraceae,  
403 overrepresented in the PF protocol. Most of these species were also recovered in the DESeq2 and  
404 ALDEx2 analyses, with the exception of both *Monomorpha* species. The PERMANOVA  
405 result showed a relatively large effect ( $R^2 = 0.69$ ;  $p = 0.001$ ), as well as for all the pairwise  
406 comparisons ( $R^2 > 0.5$ ; Table 3).

407 The species represented in the rarefied dataset differ from the ones found when using the  
408 eDNA index for the 16S primer. Most of the community assemblage difference in the eDNA  
409 index (CAP1=85%) is driven by differences between filtration and sediment protocols, with six  
410 species being underrepresented in the latter: *Burkholderiales bacterium* TP637, *Curvibacter* sp.  
411 UKPF8, *Diaphorobacter ruginosibacter* and *Verminephrobacter aporrectodeae*  
412 (Comamonadaceae); *beta proteobacterium Mzo1* (Oxalobacteraceae); and *Stella humosa*  
413 (*Peptostreptococcaceae*). Most of these species were also recovered in the DESeq2 and ALDEx2  
414 analyses, with the exception of *V. aporrectodeae*. The PERMANOVA result also showed  
415 relatively high effect ( $R^2 = 0.44$ ;  $p = 0.001$ ), but for the pairwise comparisons the effect between  
416 the filtration protocols (NF vs. PF) was relatively small ( $R^2 = 0.15$ ; Table 4).

## 417 Discussion

418 Standardized protocols to process eDNA are under development (e.g. Bohmann et al., 2021), but  
419 to implement these efficiently it is necessary to compare biases in taxa detection associated with  
420 different protocols. Here, we have explored the detection biases in community composition  
421 introduced by freezing water samples prior to filtration (for storage purposes), and the use of  
422 sediment samples as an alternative to sampling turbid waters. We find that pre-freezing water  
423 does incur some effect on the recovery of community composition, but most strongly for the 16S  
424 primer, while having a relatively small effect for the 12S when using larger, cellulose nitrate  
425 pore size filters (3  $\mu\text{m}$ ). The sediment protocol was able to recover eDNA from organisms that  
426 inhabit the water column, however, due to high variability in read abundance among replicates,  
427 we suggest increasing the number of biological replicates and/or the volume sampled in the field.

## 428 Tag-jumping contamination

429 Contamination concerns are usually centered around pre-sequencing, during the field and wet  
430 laboratory work. These are of fundamental importance and care should be taken by sterilizing  
431 equipment and using negative controls. However, previous literature shows that the sequencing  
432 phase can be another source of contamination, generating up to 10% of contaminated reads by  
433 tag-jumping (Larsson et al., 2018; Schnell et al., 2015), which can skew analyses of taxa  
434 abundance and composition towards the rare taxa. There are ways to help minimize this issue by  
435 making use of dual indexing (Kircher et al., 2012)—although see Caroe and Bohmann (2020) for  
436 a library approach without dual indexing—, and amplification of positive controls. The latter can  
437 be used to track the rate and level of contamination after sequencing to guide read cutoffs on  
438 samples (Deiner et al., 2017; Port et al., 2016).

## 439 Bioinformatics and data pre-processing

440 We relied on a bioinformatic approach developed by the metabar package, adapted from Esling  
441 et al. (2015), to reduce the issue of contamination from tag-jumping, since it does not rely solely  
442 on the use of positive controls (which we lacked in this analysis) to make the estimated cutoff  
443 thresholds. However, after manually checking the fish dataset (12S primer), the final taxonomic  
444 tables still contained reads assigned to taxa that are not found in coastal lagoons in California  
445 (Table S1). Some of it might be contamination from tag-jumping, although we cannot rule out  
446 the possibility that for a few of these species the eDNA could have come from local aquaria, as  
447 some are known in the pet trade (e.g. *Acanthurus achilles*). We also cannot disregard the  
448 limitations of the reference database, especially related to the absence of estuarine and lagoonal  
449 taxa that may lead to dubious assignments to non-local related species (Nagarajan et al., 2022).  
450 Due to inability to completely remove potential tag-jump contaminants from the dataset, we can



451 expect a bias towards the rare taxa that will inflate diversity metrics in our samples for all primer  
452 sets.

453         The sediment protocol generally showed higher variability among replicates compared to  
454 filtration protocols for both primer sets, both in number of reads and community composition  
455 (Fig. S3-4). The greater consistency of filtration replicates is a result of the single source for the  
456 water samples (the large jug). This means that potentially, multiple biological replicates could be  
457 sampled at the site and pooled for fewer downstream analysis, optimizing cost and labor (Sato et  
458 al., 2017; Dickie et al., 2018), however, since this was not the focus of this work this design  
459 would require further investigation. Sediment replicates were done by individually sampling the  
460 bottom of the lagoon. Although replicates were done a few centimeters apart, the bottom of the  
461 lagoon appears to have small-scale heterogeneity. The spatial variation of soil and sediment  
462 samples is recognized in the literature (Perkins et al., 2014; Taberlet, Prud'Homme, et al., 2012),  
463 and can be caused by sediment composition but also by the flow dynamic and distribution of  
464 eDNA in the water column. While this variability has been shown to occur for water samples as  
465 well in lentic environments (Harper et al., 2019 and references therein), the heterogeneity of  
466 water replicates in this system still requires further investigation.

467         The sediment protocol also had an overall lower number of reads compared to the  
468 filtration protocols for both primer sets (Fig. S3). The lower number of reads seems to go against  
469 the expectations that eDNA can be more concentrated in sediments (Dell'Anno & Corinaldesi,  
470 2004; Harper et al., 2019; Turner et al., 2015). This could be due to a few issues, some of which  
471 may interact. First, it could be related to a faster degradation and/or turn-over rates of eDNA in  
472 the sediment, which are determined by the soil and eDNA characteristics, as well as enzymatic  
473 and microbial activities (Levy-Booth et al., 2007; Pietramellara et al., 2009; Torti et al., 2015).

474 The overall lower abundance of eDNA in the sediments could also be driven by increased  
475 inhibition (Buxton et al., 2017; Pawlowski et al., 2022). Even though we used a specific soil  
476 extraction kit for both sediment and filtration protocols, the purification steps in the protocol  
477 could still not have been enough to reduce inhibition in the sediment as well as for the water  
478 samples. Lastly, this could have been driven by the much lower volume of sediment used: 0.25-  
479 0.3 g versus 500 mL for water samples.

480 There is also the fact that this type of environment is affected by scouring (purging of  
481 sediment to the ocean) during high precipitation events and increased flow of freshwater.  
482 However, since the sediment collection was done out of the rainy season and the lagoon was  
483 closed by a sandbar with no signs of scouring, we are confident that this was not a factor that  
484 could have caused the decreased ability to recover eDNA from the sediments. Therefore, we  
485 expect that this difference in read abundance between sediment and water samples would be  
486 more related to the other factors mentioned above, such as eDNA degradation and turn-over  
487 rates, inhibition, and different processed volumes. Considering both the high variability and the  
488 lower sequencing throughput of the sediment replicates, we advise using a modified sampling  
489 protocol, e.g. the one developed by Taberlet, Prud'Homme, et al. (2012) that includes increasing  
490 the number of replicates and mixing larger volumes before downstream processing.

#### 491 Diversity

492 Considering that contamination through tag-jumping could be inflating the numbers of rare  
493 species in the dataset, the steepness and lack of a plateau for many of the species rarefaction  
494 curves could be artificial (Fig. 4). This is especially evident for the 12S primer since we were  
495 able to manually investigate the taxonomy tables (Table S1). However, this lack of a plateau is  
496 an expected outcome from environmental samples (Alberdi et al., 2018), and has been shown to

497 occur more acutely in a coastal lagoon in California when compared to other environments in  
498 California (Shirazi et al., 2021)—albeit the authors were looking specifically at plants and fungi.  
499 The high number of species recovered from the sediment for the 16S primer (Fig. 3) is likely  
500 driven by the recovery of a rich and complex sediment biota that is not paralleled in the water  
501 column.

502         The low taxonomic assignment to the species level for some of the dubious fish species  
503 found in our dataset, e.g. *Phoxinus phoxinus*, *Odontesthes* spp. And *Sebastes pachycephalus*, also  
504 highlight the need to expand barcoding efforts to the local estuarine taxa to improve reference  
505 databases. On the other hand, *Fundulus diaphanus*, the northeastern killifish, did receive a few  
506 high taxonomic scores at the species level, which merit further consideration for biomonitoring  
507 of coastal lagoons in the region.

508         Pre-freezing water prior to filtration had an effect on the species curves of the 16S primer  
509 dataset, but not so much on the 12S. This could be explained by how differently eDNA  
510 molecules are found in the environment for these two different groups of organisms, and how  
511 freezing and thawing water would impact them. In the case of the fish fauna, the DNA that is  
512 shed from the organisms would be either found within cells, or adsorbed to colloids (Liang &  
513 Keeley, 2013; Torti et al., 2015; Turner et al., 2014). Even if cell walls were to disintegrate from  
514 the freezing and thawing process, they could still release intact mitochondria (which range from  
515 1-8  $\mu\text{m}$  in length) that could still be captured by our 3  $\mu\text{m}$  pore size filters. On the other hand,  
516 bacteria and archaea, which are prokaryotic and often single celled organisms, would have their  
517 DNA released directly to the medium and pass through the larger pore size filters ( $>0.2 \mu\text{m}$ ).  
518 Nevertheless, this freezing effect on cell walls has been shown to not always occur and likely be  
519 species-dependent (Sekar et al., 2009; Suomalainen et al., 2006).

520 Differential abundance

521 Pre-freezing water did introduce bias in species abundance compared to the no freezing protocol,  
522 although the effect was distinctively larger for the 16S than for the 12S primer dataset when  
523 using larger, cellulose nitrate pore size filters (3  $\mu\text{m}$ ). Our results seem to align to other reports,  
524 where it was shown that freezing had differential effects on detection and relative abundance of  
525 different prokaryotic taxa (Kwambana et al., 2011; Sekar et al., 2009; Suomalainen et al., 2006).  
526 The smaller effect seen for the 12S dataset could be related to the different qualities and  
527 properties of eDNA in the environment, as mentioned in the previous section ('Diversity').  
528 Larger, mitochondrial molecules from Eukaryotes may be more easily captured in the filters  
529 compared to the smaller celled, prokaryotic organisms targeted by the 16S primer.

530 Naturally, due to eDNA precipitation and resuspension, we expect to capture some  
531 community overlap between water and surficial sediment samples, however abundances should  
532 be different as consequence of the origin and fate of the eDNA in the environment and the  
533 processes acting on it throughout (Torti et al., 2015). As expected, in the differential abundance  
534 analyses, we see overrepresentation of families of algae (Hemiselmidaceae and Geminigeraceae),  
535 environmental and aquatic bacteria (Comamonadaceae, Flavobacteriaceae, Cryomorphaceae and  
536 Rhodobacteraceae), and cyanobacteria (Aphanizomenonaceae) in the water samples (NF and PF  
537 protocols). There is also significantly higher representation of presumptively benthic diatoms  
538 (Catenulaceae and Fragilariaceae), environmental bacteria (Anaerolineaceae and  
539 Desulfobacteraceae) and foraminiferans (Elphidiidae and Nonionidae) in the sediment. In  
540 addition, the types of environmental bacteria most abundant in the sediments were typical of soil  
541 and sediments elsewhere. Of particular note are those from anoxic environments (e.g.  
542 Anaerolineaceae and Desulfobacteraceae) as lagoon sediments in this region are often dark and  
543 sulfide-rich, consistent with anoxia and sulfur-cycling.

544 In the family Flavobacteriaceae there are important pathogens of fish and humans that  
545 belong to the genus *Flavobacterium*. Suomalainen et al.(2006) found that *F. columnare* was  
546 more susceptible to having its cell walls disrupted to freezing due to high amounts of DNAases,  
547 lyases and proteases, likely connected to its pathogenicity, which then led to lower rates of DNA  
548 recovery. The species found in our dataset was *F. johnsoniae*, a species not known to be  
549 pathogenic–albeit with low species taxonomic score. Given that there was no difference in  
550 abundance for this species in our NF and PF protocols, which is in contrast with the results for  
551 the pathogenic species, *F. columnare*, this might relate to a true non-pathogenic organism.  
552 However, considering that the endangered northern tidewater goby often achieves high  
553 abundance in this lagoon, more detailed assessment of the *Flavobacterium* species inhabiting this  
554 site would be of interest.

555 The other species assignment that draws our attention is the archaea Candidatus  
556 *Nitrosopelagicus brevis* (Thaumarchaeota), which was shown as more abundant in sediment than  
557 water samples. As mentioned earlier, this is a pelagic species, normally found in the open ocean  
558 worldwide. Although coastal lagoons are subject to marine input, the relatively high  
559 concentration in sediment is unexpected and merits inquiry, especially considering that the  
560 confidence in its taxonomic assignment was low across reads. More likely, this represents a new  
561 environmental archaea that is abundant in coastal lagoon sediments.

## 562 Beta diversity

563 McMurdie and Holmes (2014) recommends against rarefying datasets due to the risk of  
564 removing true, rare ASVs. However, in our case, where we were unable to completely remove  
565 tag-jumping contaminants, this pre-process could help alleviate some of the noise caused by  
566 contaminants. Nevertheless, the CAP and PERMANOVA results on both the rarefied and

567 standardized (eDNA index) dataset are mostly in agreement, and show greater differences in  
568 assemblage composition for the 16S primer than for the 12S primer, especially between the  
569 filtration and sediment protocols (NF vs. Sed; PF vs. Sed). Although results from the 12S primer  
570 were highly affected by the tag-jump contaminants in the dataset standardized using the eDNA  
571 index (Fig. S5A), the CAP analysis was able to capture the overrepresentation of tidewater goby  
572 in the filtration protocols compared to the sediment, a signal that was lost in the rarefied data  
573 (Fig. 9A).

574 For the rarefied 16S primer dataset, most species that were over- and underrepresented in  
575 the CAP analysis were also captured by the differential abundance analyses, such as *Guillardia*  
576 *theta* (Geminigeraceae), which was overrepresented in the PF protocol compared to the NF  
577 protocol. In addition, the species of foraminifera, *Elphidium williamsoni* (Elphidiidae) and the  
578 archaea *Candidatus Nitrosopelagicus brevis* (Thaumarchaeota) were found to be overrepresented  
579 in the sediment compared to the filtration protocols. The CAP results on the dataset standardized  
580 using the eDNA index (Fig. S5B) showed different species as underrepresented in the sediment  
581 compared to the filtration protocols, but those also showed up as significantly different in the  
582 differential abundance analyses, with the exception of one, *Verminephrobacter aporrectodeae*.

583 Interestingly, the CAP analysis was also able to capture the underrepresentation of  
584 tidewater gobies (*E. newberryi*) in the sediment protocol on the 16S primer when compared to  
585 the NF protocol (Fig. 9B). The 16S ribosomal RNA region have been used for fish species  
586 detection, and is not uncommon that different primer sets are taxonomically congruent (Shu,  
587 Lidwig & Peng, 2020; Alberdi et al., 2018). This reinforces the idea discussed earlier  
588 ('Bioinformatics and data pre-processing' section) that fish eDNA, at least in this environment,  
589 is less concentrated in the sediment than in the water column, which contradicts other findings

590 from the literature (Perkins et al., 2014; Turner et al., 2015). But it is worth noting that this  
591 underrepresentation of fish eDNA in the sediment was found to be of small effect for the 12S  
592 primer, though, and there could be some bias related to how these two genes behave and degrade  
593 differently in the environment for the fish fauna.

#### 594 Lessons Learned

595 Here is a list of recommendations and best practices for eDNA sampling and analysis in coastal  
596 environments that we have learned throughout this work and believe will be useful for others  
597 working in similar environments with turbid water and highly heterogeneous sediment/soil:

- 598 1. Filtered water samples had an overall higher number of reads compared to sediment for  
599 both primer sets. Therefore, we recommend the use of this protocol as it will increase  
600 chances of species detection;
- 601 2. If using sediment samples, we recommend increasing the number of replicates and  
602 mixing larger volumes before processing for DNA extractions (as in Taberlet,  
603 Prud'Homme, et al., 2012);
- 604 3. Pre-freezing water samples prior to filtration can be an effective storage solution, at least  
605 for Eukaryotes, and when used in combination with cellulose nitrate filters of up to 3  $\mu\text{m}$   
606 pore size filters;
- 607 4. The use of dual-indexing and positive controls during library preparation will help  
608 minimize and address cross-contamination from tag-jumping, as is now widely  
609 recognized in many best-practice protocols (e.g. Deiner et al., 2017; Goldberg et al.,  
610 2016);
- 611 5. Although rarefying the dataset is not recommended (McMurdie & Holmes, 2014), we  
612 recognize that it can aid in reducing the noise of contaminants from your dataset, as long

613 as they are rare. Otherwise, the use of eDNA index (Kelly et al., 2019) can be an  
614 alternative to standardize your dataset.

## 615 Conclusions

616 In this work, we assessed environmental DNA protocols for use in coastal lagoons, a highly  
617 dynamic habitat at the intersection of terrestrial, freshwater and marine environments. Pre-  
618 freezing water combined with the use of larger pore size filters (at least up to 3  $\mu\text{m}$ ) can be a  
619 viable alternative for storage and processing of turbid water samples, at least in the case of fish  
620 communities (12S, MiFish). However, the use of sediment samples as an alternative to  
621 processing water samples should be done with caution, and at minimum the number of biological  
622 replicates and/or volume sampled should be increased. Also, while sediment samples were able  
623 to recover eDNA from organisms commonly found in the water column, such as the tidewater  
624 goby, this was achieved during a period of relatively long lagoon closure, when there was no  
625 recent scouring of sediments to the ocean.

626 While we expect these guidelines to be helpful in the development of strategies to use  
627 eDNA as a monitoring resource in similar environments, protocol testing is still strongly advised  
628 whenever possible, especially when working in a new system. Much work is necessary to  
629 understand the full potential eDNA brings for the conservation and restoration of endangered  
630 species and habitats.

631

## 632 Acknowledgements

633 Funding was provided by the National Council for Scientific and Technological Development of  
634 Brazil (Rachel Turba) under Grant No. 209261/2014-5 and by NOAA Sea Grant 120651698:1.



635 Funding for the CALeDNA sample processing, infrastructure, and personnel was provided by the  
636 University of California Research Initiatives (UCRI) Catalyst grant CA-16-376437 and Howard  
637 Hughes Medical Institute (HHMI) Professors Grant GT10483. We are very grateful for all the  
638 help provided by the CALeDNA team, but would like to give special thanks to Teia Schweizer,  
639 who personally trained us in the bench work. Huge thanks to Ryan Kelly, for helping streamline  
640 the design and analysis of this paper and for always being so responsive via email, and to  
641 reviewer David Murray-Stoker for a much detailed and comprehensive feedback that helped  
642 improve this manuscript.

643

644 References

- 645 Alberdi, A., Aizpurua, O., Gilbert, M. T. P., & Bohmann, K. (2018). Scrutinizing key steps for  
646 reliable metabarcoding of environmental samples. *Methods in Ecology and Evolution*,  
647 9(1), 134–147. <https://doi.org/10.1111/2041-210X.12849>
- 648 Ballard, J., Pezda, J., Spencer, D., & Plantinga, A. (n.d.). *An Economic Valuation of Southern*  
649 *California Coastal Wetlands*. [http://scwrp.org/wp-](http://scwrp.org/wp-content/uploads/2017/06/SoCalWetlands_FinalReport.pdf)  
650 [content/uploads/2017/06/SoCalWetlands\\_FinalReport.pdf](http://scwrp.org/wp-content/uploads/2017/06/SoCalWetlands_FinalReport.pdf)
- 651 Bischoff, V., Zucker, F., & Moraru, C. (2021). Marine Bacteriophages. In D. H. Bamford & M.  
652 Zuckerman (Eds.), *Encyclopedia of Virology (Fourth Edition)* (pp. 322–341). Academic  
653 Press. <https://doi.org/10.1016/B978-0-12-809633-8.20988-6>
- 654 Bohmann, K., Chua, P., Holman, L. E., & Lynggaard, C. (2021). DNAqua-Net conference unites  
655 participants from around the world with the quest to standardize and implement DNA-  
656 based aquatic biomonitoring. *Environmental DNA*, 3(5), 884–888.  
657 <https://doi.org/10.1002/edn3.207>
- 658 Bowman, J. P. (2014). The Family Cryomorphaceae. In E. Rosenberg, E. F. DeLong, S. Lory, E.  
659 Stackebrandt, & F. Thompson (Eds.), *The Prokaryotes* (pp. 539–550). Springer Berlin  
660 Heidelberg. [https://doi.org/10.1007/978-3-642-38954-2\\_135](https://doi.org/10.1007/978-3-642-38954-2_135)
- 661 Buxton, A. S., Groombridge, J. J., & Griffiths, R. A. (2017). Is the detection of aquatic  
662 environmental DNA influenced by substrate type? *PLOS ONE*, 12(8), e0183371.  
663 <https://doi.org/10.1371/journal.pone.0183371>
- 664 Callahan, B. J., McMurdie, P. J., Rosen, M. J., Han, A. W., Johnson, A. J. A., & Holmes, S. P.  
665 (2016). DADA2: High-resolution sample inference from Illumina amplicon data. *Nature*  
666 *Methods*, 13(7), 581–583. <https://doi.org/10.1038/nmeth.3869>

- 667 Caporaso, J. G., Lauber, C. L., Walters, W. A., Berg-Lyons, D., Huntley, J., Fierer, N., Owens,  
668 S. M., Betley, J., Fraser, L., Bauer, M., Gormley, N., Gilbert, J. A., Smith, G., & Knight,  
669 R. (2012). Ultra-high-throughput microbial community analysis on the Illumina HiSeq  
670 and MiSeq platforms. *The ISME Journal*, 6(8), 1621–1624.  
671 <https://doi.org/10.1038/ismej.2012.8>
- 672 Caroe, C., & Bohmann, K. (2020). Tagsteady: A metabarcoding library preparation protocol to  
673 avoid false assignment of sequences to samples. *BioRxiv*.
- 674 Chen, H. (2018). *VennDiagram: Generate High-Resolution Venn and Euler Plots* (1.6.20).  
675 <https://CRAN.R-project.org/package=VennDiagram>
- 676 Curd, E., Gomer, J., Kandlikar, G., Gold, Z., Ogden, M., & Shi, B. (2018). *The Anacapa Toolkit*.  
677 <https://github.com/limey-bean/Anacapa>
- 678 Curd, E., Kandlikar, G., & Gomer, J. (2018). *CRUX: Creating Reference libraries Using*  
679 *eXisting tools*. [https://github.com/limey-bean/CRUX\\_Creating-Reference-libraries-](https://github.com/limey-bean/CRUX_Creating-Reference-libraries-Using-eXisting-tools)  
680 [Using-eXisting-tools](https://github.com/limey-bean/CRUX_Creating-Reference-libraries-Using-eXisting-tools)
- 681 Deiner, K., Bik, H. M., Mächler, E., Seymour, M., Lacoursière-Roussel, A., Altermatt, F., Creer,  
682 S., Bista, I., Lodge, D. M., & De Vere, N. (2017). Environmental DNA metabarcoding:  
683 Transforming how we survey animal and plant communities. *Molecular Ecology*, 26(21),  
684 5872–5895.
- 685 Deiner, K., Walser, J.-C., Mächler, E., & Altermatt, F. (2015). Choice of capture and extraction  
686 methods affect detection of freshwater biodiversity from environmental DNA. *Biological*  
687 *Conservation*, 183, 53–63.
- 688 Dejean, T., Valentini, A., Miquel, C., Taberlet, P., Bellemain, E., & Miaud, C. (2012). Improved  
689 detection of an alien invasive species through environmental DNA barcoding: The

- 690 example of the American bullfrog *Lithobates catesbeianus*: Alien invasive species  
691 detection using eDNA. *Journal of Applied Ecology*, 49(4), 953–959.  
692 <https://doi.org/10.1111/j.1365-2664.2012.02171.x>
- 693 Dell’Anno, A., & Corinaldesi, C. (2004). Degradation and Turnover of Extracellular DNA in  
694 Marine Sediments: Ecological and Methodological Considerations Degradation and  
695 Turnover of Extracellular DNA in Marine Sediments: Ecological and Methodological  
696 Considerations. *Applied and Environmental Microbiology*, 70(7), 4384–4386.  
697 <https://doi.org/10.1128/AEM.70.7.4384>
- 698 Doi, H., Uchii, K., Matsushashi, S., Takahara, T., Yamanaka, H., & Minamoto, T. (2017).  
699 Isopropanol precipitation method for collecting fish environmental DNA. *Limnology and*  
700 *Oceanography: Methods*, 15(2), 212–218. <https://doi.org/10.1002/lom3.10161>
- 701 Earl, D. A., Louie, K. D., Bardeleben, C., Swift, C. C., & Jacobs, D. K. (2010). Rangewide  
702 microsatellite phylogeography of the endangered tidewater goby, a genetically  
703 subdivided coastal fish with limited marine dispersal. *Conservation Genetics*, 11, 103–  
704 104. <https://doi.org/10.1007/s10592-009-0008-9>
- 705 Esling, P., Lejzerowicz, F., & Pawlowski, J. (2015). Accurate multiplexing and filtering for high-  
706 throughput amplicon-sequencing. *Nucleic Acids Research*, 43(5), 2513–2524.  
707 <https://doi.org/10.1093/nar/gkv107>
- 708 *FASTX-Toolkit*. (n.d.). Retrieved January 11, 2018, from [http://hannonlab.cshl.edu/fastx\\_toolkit/](http://hannonlab.cshl.edu/fastx_toolkit/)
- 709 Fernandes, A. D., Macklaim, J. M., Linn, T. G., Reid, G., & Gloor, G. B. (2013). ANOVA-Like  
710 Differential Expression (ALDEx) Analysis for Mixed Population RNA-Seq. *PLoS ONE*,  
711 8(7), e67019. <https://doi.org/10.1371/journal.pone.0067019>

- 712 Ficetola, G. F., Miaud, C., Pompanon, F., & Taberlet, P. (2008). Species detection using  
713 environmental DNA from water samples. *Biology Letters*, 4(4), 423–425.  
714 <https://doi.org/10.1098/rsbl.2008.0118>
- 715 Gao, X., Lin, H., Revanna, K., & Dong, Q. (2017). A Bayesian taxonomic classification method  
716 for 16S rRNA gene sequences with improved species-level accuracy. *BMC*  
717 *Bioinformatics*, 18(1), 247. <https://doi.org/10.1186/s12859-017-1670-4>
- 718 Gbif.Org. (2022). *Occurrence Download* (p. 170487) [Darwin Core Archive]. The Global  
719 Biodiversity Information Facility. <https://doi.org/10.15468/DL.HTJ3HT>
- 720 Goldberg, C. S., Turner, C. R., Deiner, K., Klymus, K. E., Thomsen, P. F., Murphy, M. A.,  
721 Spear, S. F., McKee, A., Oyler-McCance, S. J., & Cornman, R. S. (2016). Critical  
722 considerations for the application of environmental DNA methods to detect aquatic  
723 species. *Methods in Ecology and Evolution*, 7(11), 1299–1307.
- 724 Harper, L. R., Buxton, A. S., Rees, H. C., Bruce, K., Brys, R., Halfmaerten, D., Read, D. S.,  
725 Watson, H. V., Sayer, C. D., & Jones, E. P. (2019). Prospects and challenges of  
726 environmental DNA (eDNA) monitoring in freshwater ponds. *Hydrobiologia*, 826(1),  
727 25–41.
- 728 Hinlo, R., Gleeson, D., Lintermans, M., & Furlan, E. (2017). Methods to maximise recovery of  
729 environmental DNA from water samples. *PloS One*, 12(6), e0179251.
- 730 Jacobs, D. K., Stein, E. D., & Longcore, T. (2011). Classification of California Estuaries Based  
731 on Natural Closure Patterns: Templates for Restoration and Management Management.  
732 *Technical Report, August*, 1–72.
- 733 Kandlikar, G. (2020). *ranacapa: Utility Functions and “shiny” App for Simple Environmental*  
734 *DNA Visualizations and Analyses* (0.1.0). <https://github.com/gauravsk/ranacapa>

- 735 Kelly, R. P., Shelton, A. O., & Gallego, R. (2019). Understanding PCR Processes to Draw  
736 Meaningful Conclusions from Environmental DNA Studies. *Scientific Reports*, *9*(1),  
737 12133. <https://doi.org/10.1038/s41598-019-48546-x>
- 738 Kircher, M., Sawyer, S., & Meyer, M. (2012). Double indexing overcomes inaccuracies in  
739 multiplex sequencing on the Illumina platform. *Nucleic Acids Research*, *40*(1), e3–e3.  
740 <https://doi.org/10.1093/nar/gkr771>
- 741 Kumar, G., Farrell, E., Reaume, A. M., Eble, J. A., & Gaither, M. R. (2022). One size does not  
742 fit all: Tuning eDNA protocols for high- and low-turbidity water sampling.  
743 *Environmental DNA*, *4*(1), 167–180. <https://doi.org/10.1002/edn3.235>
- 744 Kwambana, B. A., Mohammed, N. I., Jeffries, D., Barer, M., Adegbola, R. A., & Antonio, M.  
745 (2011). Differential effects of frozen storage on the molecular detection of bacterial taxa  
746 that inhabit the nasopharynx. *BMC Clinical Pathology*, *11*(1), 2.  
747 <https://doi.org/10.1186/1472-6890-11-2>
- 748 Langmead, B., & Salzberg, S. L. (2012). Fast gapped-read alignment with Bowtie 2. *Nature*  
749 *Methods*, *9*(4), 357–359. <https://doi.org/10.1038/nmeth.1923>
- 750 Laramie, M. B., Pilliod, D. S., Goldberg, C. S., & Strickler, K. M. (2015). Environmental DNA  
751 sampling protocol—Filtering water to capture DNA from aquatic organisms. *U.S*  
752 *Geological Survey Techniques and Methods, Book 2*(Chapter A13), 15 p.  
753 <https://doi.org/10.3133/TM2A13>
- 754 Larsson, A. J. M., Stanley, G., Sinha, R., Weissman, I. L., & Sandberg, R. (2018).  
755 Computational correction of index switching in multiplexed sequencing libraries. *Nature*  
756 *Methods*, *15*(5), 305–307. <https://doi.org/10.1038/nmeth.4666>

- 757 Leray, M., Yang, J. Y., Meyer, C. P., Mills, S. C., Agudelo, N., Ranwez, V., Boehm, J. T., &  
758 Machida, R. J. (2013). A new versatile primer set targeting a short fragment of the  
759 mitochondrial COI region for metabarcoding metazoan diversity: Application for  
760 characterizing coral reef fish gut contents. *Frontiers in Zoology*, *10*(1), 34.  
761 <https://doi.org/10.1186/1742-9994-10-34>
- 762 Levy-Booth, D. J., Campbell, R. G., Gulden, R. H., Hart, M. M., Powell, J. R., Klironomos, J.  
763 N., Pauls, K. P., Swanton, C. J., Trevors, J. T., & Dunfield, K. E. (2007). Cycling of  
764 extracellular DNA in the soil environment. *Soil Biology and Biochemistry*, *39*(12), 2977–  
765 2991. <https://doi.org/10.1016/j.soilbio.2007.06.020>
- 766 Li, J., Lawson Handley, L.-J., Read, D. S., & Hänfling, B. (2018). The effect of filtration method  
767 on the efficiency of environmental DNA capture and quantification via metabarcoding.  
768 *Molecular Ecology Resources*, *18*(5), 1102–1114.
- 769 Liang, Z., & Keeley, A. (2013). Filtration Recovery of Extracellular DNA from Environmental  
770 Water Samples. *Environmental Science & Technology*, *47*(16), 9324–9331.  
771 <https://doi.org/10.1021/es401342b>
- 772 Love, M. I., Huber, W., & Anders, S. (2014). Moderated estimation of fold change and  
773 dispersion for RNA-seq data with DESeq2. *Genome Biology*, *15*(12), 550.  
774 <https://doi.org/10.1186/s13059-014-0550-8>
- 775 Majaneva, M., Diserud, O. H., Eagle, S. H., Boström, E., Hajibabaei, M., & Ekrem, T. (2018).  
776 Environmental DNA filtration techniques affect recovered biodiversity. *Scientific*  
777 *Reports*, *8*(1), 1–11.
- 778 Martin, M. (2013). Cutadapt removes adapter sequences from high-throughput sequencing reads.  
779 *EMBnet.Journal*, *17*(1), 10–12.

- 780 McMurdie, P. J., & Holmes, S. (2013). phyloseq: An R Package for Reproducible Interactive  
781 Analysis and Graphics of Microbiome Census Data. *PLoS ONE*, 8(4), e61217.  
782 <https://doi.org/10.1371/journal.pone.0061217>
- 783 McMurdie, P. J., & Holmes, S. (2014). Waste Not, Want Not: Why Rarefying Microbiome Data  
784 Is Inadmissible. *PLoS Computational Biology*, 10(4), e1003531.  
785 <https://doi.org/10.1371/journal.pcbi.1003531>
- 786 Miya, M., Sato, Y., Fukunaga, T., Sado, T., Poulsen, J. Y., Sato, K., Minamoto, T., Yamamoto,  
787 S., Yamanaka, H., Araki, H., Kondoh, M., & Iwasaki, W. (2015). MiFish, a set of  
788 universal PCR primers for metabarcoding environmental DNA from fishes: Detection of  
789 more than 230 subtropical marine species. *Royal Society Open Science*, 2(7).  
790 <http://rsos.royalsocietypublishing.org/content/2/7/150088.abstract>
- 791 Nagarajan, R. P., Bedwell, M., Holmes, A. E., Sanches, T., Acuña, S., Baerwald, M., Barnes, M.  
792 A., Blankenship, S., Connon, R. E., Deiner, K., Gille, D., Goldberg, C. S., Hunter, M. E.,  
793 Jerde, C. L., Luikart, G., Meyer, R. S., Watts, A., & Schreier, A. (2022). Environmental  
794 DNA Methods for Ecological Monitoring and Biodiversity Assessment in Estuaries.  
795 *Estuaries and Coasts*, 45(7), 2254–2273. <https://doi.org/10.1007/s12237-022-01080-y>
- 796 Oksanen, J., Blanchet, F. G., Friendly, M., Kindt, R., Legendre, P., McGlenn, D., Minchin, P. R.,  
797 O'Hara, R. B., Simpson, G. L., Solymos, P., Stevens, M. H. H., Szoecs, E., & Wagner, H.  
798 (2019). *vegan: Community Ecology Package* (2.5-6). [https://CRAN.R-](https://CRAN.R-project.org/package=vegan)  
799 [project.org/package=vegan](https://CRAN.R-project.org/package=vegan)
- 800 Pawlowski, J., Bruce, K., Panksep, K., Aguirre, F. I., Amalfitano, S., Apothéloz-Perret-Gentil,  
801 L., Baussant, T., Bouchez, A., Carugati, L., Cermakova, K., Cordier, T., Corinaldesi, C.,  
802 Costa, F. O., Danovaro, R., Dell'Anno, A., Duarte, S., Eisendle, U., Ferrari, B. J. D.,



- 803 Frontalini, F., ... Fazi, S. (2022). Environmental DNA metabarcoding for benthic  
804 monitoring: A review of sediment sampling and DNA extraction methods. *Science of The*  
805 *Total Environment*, 818, 151783. <https://doi.org/10.1016/j.scitotenv.2021.151783>
- 806 Perkins, T. L., Clements, K., Baas, J. H., Jago, C. F., Jones, D. L., Malham, S. K., & McDonald,  
807 J. E. (2014). Sediment Composition Influences Spatial Variation in the Abundance of  
808 Human Pathogen Indicator Bacteria within an Estuarine Environment. *PLoS ONE*, 9(11),  
809 e112951. <https://doi.org/10.1371/journal.pone.0112951>
- 810 Pietramellara, G., Ascher, J., Borgogni, F., Ceccherini, M. T., Guerri, G., & Nannipieri, P.  
811 (2009). Extracellular DNA in soil and sediment: Fate and ecological relevance. *Biology*  
812 *and Fertility of Soils*, 45(3), 219–235. <https://doi.org/10.1007/s00374-008-0345-8>
- 813 Pilliod, D. S., Goldberg, C. S., Arkle, R. S., Waits, L. P., & Richardson, J. (2013). Estimating  
814 occupancy and abundance of stream amphibians using environmental DNA from filtered  
815 water samples. *Canadian Journal of Fisheries and Aquatic Sciences*, 70(8), 1123–1130.  
816 <https://doi.org/10.1139/cjfas-2013-0047>
- 817 Port, J. A., O'Donnell, J. L., Romero-Maraccini, O. C., Leary, P. R., Litvin, S. Y., Nickols, K. J.,  
818 Yamahara, K. M., & Kelly, R. P. (2016). Assessing vertebrate biodiversity in a kelp  
819 forest ecosystem using environmental DNA. *Molecular Ecology*, 25(2), 527–541.  
820 <https://doi.org/10.1111/mec.13481>
- 821 R Core Team. (2018). *R: A language and environment for statistical computing*. R Foundation  
822 for Statistical Computing. <https://www.R-project.org/>
- 823 Rees, H. C., Maddison, B. C., Middleditch, D. J., Patmore, J. R. M., & Gough, K. C. (2014).  
824 REVIEW: The detection of aquatic animal species using environmental DNA – a review

825 of eDNA as a survey tool in ecology. *Journal of Applied Ecology*, 51(5), 1450–1459.  
826 <https://doi.org/10.1111/1365-2664.12306>

827 Robson, H. L. A., Noble, T. H., Saunders, R. J., Robson, S. K. A., Burrows, D. W., & Jerry, D.  
828 R. (2016). Fine-tuning for the tropics: Application of eDNA technology for invasive fish  
829 detection in tropical freshwater ecosystems. *Molecular Ecology Resources*, 16(4), 922–  
830 932. <https://doi.org/10.1111/1755-0998.12505>

831 RStudio Team. (2020). *RStudio: Integrated Development for R*. RStudio, PBC.  
832 <http://www.rstudio.com/>

833 Sales, N. G., Wangenstein, O. S., Carvalho, D. C., & Mariani, S. (2019). Influence of  
834 preservation methods, sample medium and sampling time on eDNA recovery in a  
835 neotropical river. *Environmental DNA*, 1(2), edn3.14. <https://doi.org/10.1002/edn3.14>

836 Santoro, A. E., Dupont, C. L., Richter, R. A., Craig, M. T., Carini, P., McIlvin, M. R., Yang, Y.,  
837 Orsi, W. D., Moran, D. M., & Saito, M. A. (2015). Genomic and proteomic  
838 characterization of “*Candidatus Nitrosopelagicus brevis*”: An ammonia-oxidizing  
839 archaeon from the open ocean. *Proceedings of the National Academy of Sciences*, 112(4),  
840 1173–1178. <https://doi.org/10.1073/pnas.1416223112>

841 Sard, N. M., Herbst, S. J., Nathan, L., Uhrig, G., Kanefsky, J., Robinson, J. D., & Scribner, K. T.  
842 (2019). Comparison of fish detections, community diversity, and relative abundance  
843 using environmental DNA metabarcoding and traditional gears. *Environmental DNA*,  
844 1(4), 368–384. <https://doi.org/10.1002/edn3.38>

845 Schaarschmidt, F., & Gerhard, D. (2019). *PairwiseCI: Confidence Intervals for Two Sample*  
846 *Comparisons* (0.1-27). <https://CRAN.R-project.org/package=pairwiseCI>

- 847 Schnell, I. B., Bohmann, K., & Gilbert, M. T. P. (2015). Tag jumps illuminated—Reducing  
848 sequence-to-sample misidentifications in metabarcoding studies. *Molecular Ecology*  
849 *Resources*, 15(6), 1289–1303. <https://doi.org/10.1111/1755-0998.12402>
- 850 SCWRP. (2018). *Wetlands on the Edge: The Future of Southern California’s Wetlands:*  
851 *Regional Strategy 2018* (p. 142). California State Coastal Conservancy.  
852 [scwrp.databasin.org](http://scwrp.databasin.org)
- 853 Sekar, R., Kaczmarczyk, L. T., & Richardson, L. L. (2009). Effect of Freezing on PCR  
854 Amplification of 16S rRNA Genes from Microbes Associated with Black Band Disease  
855 of Corals. *Applied and Environmental Microbiology*, 75(8), 2581–2584.  
856 <https://doi.org/10.1128/AEM.01500-08>
- 857 Shaffer, H. B., Fellers, G. M., Randal Voss, S., Oliver, J. C., & Pauly, G. B. (2004). Species  
858 boundaries, phylogeography and conservation genetics of the red-legged frog (*Rana*  
859 *aurora/draytonii*) complex. *Molecular Ecology*, 13(9), 2667–2677.  
860 <https://doi.org/10.1111/j.1365-294X.2004.02285.x>
- 861 Shirazi, S., Meyer, R. S., & Shapiro, B. (2021). Revisiting the effect of PCR replication and  
862 sequencing depth on biodiversity metrics in environmental DNA metabarcoding. *Ecology*  
863 *and Evolution*, 11(22), 15766–15779. <https://doi.org/10.1002/ece3.8239>
- 864 Smart, A. S., Weeks, A. R., Rooyen, A. R., Moore, A., McCarthy, M. A., & Tingley, R. (2016).  
865 Assessing the cost-efficiency of environmental DNA sampling. *Methods in Ecology and*  
866 *Evolution*, 7(11), 1291–1298. <https://doi.org/10.1111/2041-210X.12598>
- 867 Stein, E. D., Cayce, K., Salomon, M., Bram, D. L., De Mello, D., Grossinger, R., & Dark, S.  
868 (2014). *Wetlands of the Southern California Coast: Historical Extent and Change Over*  
869 *Time* (SFEI Report 720; SCCWRP Technical Report 826; p. 58). Southern California

- 870 Coastal Water Research Project and San Francisco Estuary Institute.  
871 <https://www.caltsheets.org/socal/download.html>
- 872 Suomalainen, L.-R., Reunanen, H., Ijäs, R., Valtonen, E. T., & Tirola, M. (2006). Freezing  
873 Induces Biased Results in the Molecular Detection of *Flavobacterium columnare*.  
874 *Applied and Environmental Microbiology*, 72(2), 1702–1704.  
875 <https://doi.org/10.1128/AEM.72.2.1702-1704.2006>
- 876 Swift, C. C., Haglund, T. R., Ruiz, M., & Fisher, R. N. (1993). The Status and Distribution of the  
877 Freshwater Fishes of Southern California. *Bulletin of the Southern California Academy of*  
878 *Sciences*, 92(3), 101–167.
- 879 Swift, C. C., Spies, B., Ellingson, R. A., & Jacobs, D. K. (2016). A New Species of the Bay  
880 Goby Genus *Eucyclogobius*, Endemic to Southern California: Evolution, Conservation,  
881 and Decline. *PloS One*, 11(7), e0158543. <https://doi.org/10.1371/journal.pone.0158543>
- 882 Taberlet, P., Coissac, E., Pompanon, F., Brochmann, C., & Willerslev, E. (2012). Towards next-  
883 generation biodiversity assessment using DNA metabarcoding: NEXT-GENERATION  
884 DNA METABARCODING. *Molecular Ecology*, 21(8), 2045–2050.  
885 <https://doi.org/10.1111/j.1365-294X.2012.05470.x>
- 886 Taberlet, P., Prud'Homme, S. M., Campione, E., Roy, J., Miquel, C., Shehzad, W., Gielly, L.,  
887 Rioux, D., Choler, P., Clément, J.-C., Melodelima, C., Pompanon, F., & Coissac, E.  
888 (2012). Soil sampling and isolation of extracellular DNA from large amount of starting  
889 material suitable for metabarcoding studies: EXTRACTION OF EXTRACELLULAR  
890 DNA FROM SOIL. *Molecular Ecology*, 21(8), 1816–1820.  
891 <https://doi.org/10.1111/j.1365-294X.2011.05317.x>

- 892 Takahara, T., Minamoto, T., & Doi, H. (2015). Effects of sample processing on the detection rate  
893 of environmental DNA from the Common Carp (*Cyprinus carpio*). *Biological*  
894 *Conservation*, *183*, 64–69. <https://doi.org/10.1016/j.biocon.2014.11.014>
- 895 Thomsen, P. F., & Willerslev, E. (2015). Environmental DNA – An emerging tool in  
896 conservation for monitoring past and present biodiversity. *Biological Conservation*, *183*,  
897 4–18. <https://doi.org/10.1016/j.biocon.2014.11.019>
- 898 Torti, A., Lever, M. A., & Jørgensen, B. B. (2015). Origin, dynamics, and implications of  
899 extracellular DNA pools in marine sediments. *Marine Genomics*, *24*, 185–196.  
900 <https://doi.org/10.1016/j.margen.2015.08.007>
- 901 Tsuji, S., Takahara, T., Doi, H., Shibata, N., & Yamanaka, H. (2019). The detection of aquatic  
902 macroorganisms using environmental DNA analysis—A review of methods for  
903 collection, extraction, and detection. *Environmental DNA*, *1*(2), 99–108.  
904 <https://doi.org/10.1002/edn3.21>
- 905 Turner, C. R., Barnes, M. A., Xu, C. C. Y., Jones, S. E., Jerde, C. L., & Lodge, D. M. (2014).  
906 Particle size distribution and optimal capture of aqueous microbial eDNA. *Methods in*  
907 *Ecology and Evolution*, *5*(7), 676–684. <https://doi.org/10.1111/2041-210X.12206>
- 908 Turner, C. R., Uy, K. L., & Everhart, R. C. (2015). Fish environmental DNA is more  
909 concentrated in aquatic sediments than surface water. *Biological Conservation*, *183*, 93–  
910 102. <https://doi.org/10.1016/j.biocon.2014.11.017>
- 911 van der Loos, L. M., & Nijland, R. (2021). Biases in bulk: DNA metabarcoding of marine  
912 communities and the methodology involved. *Molecular Ecology*, *30*(13), 3270–3288.  
913 <https://doi.org/10.1111/mec.15592>

- 914 WeatherSpark.com. (n.d.). *Historical Weather Summer 2018 at Point Mugu Naval Air Warfare*  
915 *Center*. WeatherSpark.Com. Retrieved June 8, 2022, from  
916 [https://weatherspark.com/h/s/145310/2018/1/Historical-Weather-Summer-2018-at-Point-](https://weatherspark.com/h/s/145310/2018/1/Historical-Weather-Summer-2018-at-Point-Mugu-Naval-Air-Warfare-Center;-California;-United-States#Figures-Rainfall)  
917 [Mugu-Naval-Air-Warfare-Center;-California;-United-States#Figures-Rainfall](https://weatherspark.com/h/s/145310/2018/1/Historical-Weather-Summer-2018-at-Point-Mugu-Naval-Air-Warfare-Center;-California;-United-States#Figures-Rainfall)
- 918 Williams, K. E., Huyvaert, K. P., & Piaggio, A. J. (2017). Clearing muddied waters: Capture of  
919 environmental DNA from turbid waters. *PLOS ONE*, 12(7), e0179282.  
920 <https://doi.org/10.1371/journal.pone.0179282>
- 921 Zinger, L., Lionnet, C., Benoiston, A.-S., Donald, J., Mercier, C., & Boyer, F. (2020). *metabarR:*  
922 *An R package for the evaluation and improvement of DNA metabarcoding data quality*  
923 [Preprint]. Bioinformatics. <https://doi.org/10.1101/2020.08.28.271817>
- 924  
925

926 Tables

927 Table 1: Detailed information of the primers used.

| Primer | Targets                    | Forward Primer                 | Reverse Primer                  | Reference                                         |
|--------|----------------------------|--------------------------------|---------------------------------|---------------------------------------------------|
| 12S    | Fish                       | GTCGGTAAAACCTCGTG<br>CCAGC     | CATAGTGGGGTATCT<br>AATCCCAGTTTG | Miya et al., 2015                                 |
| 16S    | Bacteria<br>and<br>archaea | GTGYCAGCMGCCGCGG<br>TAA        | GGACTACNVGGGTWT<br>CTAAT        | Caporaso et al.,<br>2012 (F: 515F and<br>R: 806R) |
| COI    | Animals                    | GGWACWGGWTGAACW<br>GTWTAYCCYCC | TANACYTCnGGRTGN<br>CCRAARAYCA   | Leray et al., 2013                                |

928

929 Table 2: Confidence interval estimates and upper/lower limits of species rarefaction curves (Fig.  
930 4). NF: no freezing; PF: pre-freezing; Sed: sediment.

| Primer | Comparison | Estimate | Lower    | Upper    |
|--------|------------|----------|----------|----------|
|        | PF-NF      | -1.43693 | -3.77705 | 0.903185 |
| 12S    | Sed-NF     | -6.24818 | -11.198  | -1.29838 |
|        | Sed-PF     | -4.81125 | -9.76679 | 0.144296 |
|        | PF-NF      | -0.2004  | -0.29947 | -0.10132 |
| 16S    | Sed-NF     | -0.54775 | -0.73983 | -0.35568 |
|        | Sed-PF     | -0.34736 | -0.54064 | -0.15408 |

931

932

933 Table 3: PERMANOVA and pairwise PERMANOVA (rarefied dataset) between all three  
 934 protocols: no-freezing, pre-freezing and sediment. P.adjusted is the adjusted p-value after FDR  
 935 correction.

| Primer | PERMANOVA |        | Pairwise PERMANOVA          |         |         |         |            |
|--------|-----------|--------|-----------------------------|---------|---------|---------|------------|
|        | R2        | Pr(>F) | Comparison                  | F.Model | R2      | p.value | p.adjusted |
| 12S    | 0.3803    | 0.05   | No-freezing vs Pre-freezing | 2.07252 | 0.20576 | 0.169   | 0.295      |
|        |           |        | No-freezing vs Sediment     | 3.56051 | 0.41592 | 0.295   | 0.295      |
|        |           |        | Pre-freezing vs Sediment    | 2.25713 | 0.31102 | 0.229   | 0.295      |
| 16S    | 0.6922    | 0.001  | No-freezing vs Pre-freezing | 10.3356 | 0.56369 | 0.006   | 0.009      |
|        |           |        | No-freezing vs Sediment     | 12.1022 | 0.63355 | 0.007   | 0.009      |
|        |           |        | Pre-freezing vs Sediment    | 12.5474 | 0.6419  | 0.009   | 0.009      |

936

937 Table 4: Pairwise PERMANOVA and pairwise PERMANOVA (eDNA index dataset) between  
 938 all three protocols: no-freezing, pre-freezing and sediment pre- and no freezing water prior to  
 939 filtration and sediment samples. P.adjusted is the adjusted p-value after FDR correction.

| Primer | PERMANOVA |        | Pairwise PERMANOVA          |         |         |         |            |
|--------|-----------|--------|-----------------------------|---------|---------|---------|------------|
|        | R2        | Pr(>F) | Comparison                  | F.Model | R2      | p.value | p.adjusted |
| 12S    | 0.2113    | 0.055  | No-freezing vs Pre-freezing | 1.25387 | 0.1355  | 0.297   | 0.297      |
|        |           |        | No-freezing vs Sediment     | 1.76131 | 0.18044 | 0.112   | 0.168      |
|        |           |        | Pre-freezing vs Sediment    | 1.69357 | 0.17471 | 0.077   | 0.168      |
| 16S    | 0.4417    | 0.001  | No-freezing vs Pre-freezing | 1.47905 | 0.15603 | 0.005   | 0.0135     |
|        |           |        | No-freezing vs Sediment     | 5.96537 | 0.42715 | 0.017   | 0.017      |
|        |           |        | Pre-freezing vs Sediment    | 6.51459 | 0.44883 | 0.009   | 0.0135     |

940

941



## 942 Figure legends

943 Figure 1: Photo of Topanga lagoon taken on August 22nd, 2018, a few weeks after collection.  
944 There was no record of precipitation for the previous three months and the lagoon was closed to  
945 the ocean by a sandbar. There was also no sign of recent waves topping over the sandbar and  
946 reaching the lagoon.

947 Figure 2: Flowchart of the study design. Water was taken as a single sample in a 18 L water jug  
948 from the middle of the lagoon (Fig. 1). In the laboratory, the water was split in batches to follow  
949 either the centrifugation or the filtration protocol. Sediment samples were taken in 2  $\mu$ L  
950 cryotubes at the same location where water was taken. Subsamples of these were then pooled in  
951 triplicates prior to extraction (total 0.25-0.3 g). The dotted box indicates which part of the study  
952 design is addressed in the main paper, and which is addressed in the supplemental material. The  
953 black 'X' indicates the stage at which DNA extraction was performed and sequenced. Figures  
954 were obtained from Biorender.

955 Figure 3: Venn diagrams of A) 12S and B) 16S primers showing the number of species found at  
956 and between each protocol. Sediment samples showed the highest number of unique species for  
957 both primers, although for the 12S dataset, about 28% are the result of contamination from tag-  
958 jumping.

959 Figure 4: Species rarefaction curves based on sequencing effort for each protocol. A) 12S  
960 primer; B) 16S primer. With the exception of the water samples for the 12S primer, none of the  
961 curves have reached a plateau, although we expect the high diversity seen for the 12S sediment  
962 samples be due to contamination from tag-jumping.

963 Figure 5: Confidence interval (CI) for slopes of rarefaction curves (Fig. 3) for each pairwise  
964 comparison of the different protocols. Only the comparison between pre- versus no freezing  
965 water samples, and pre-freezing versus sediment samples for the 12S primer (A) have come out  
966 non significant. The remaining comparisons showed significant differences between rarefaction  
967 slopes.

968 Figure 6: Plots of log<sub>2</sub>fold change of families of bacteria and archaea (16S primer) for the  
969 pairwise comparison between A) no freezing versus sediment; and B) pre-freezing versus  
970 sediment. Circles are colored by phylum. Species present above zero are overrepresented in the  
971 pre- or no freezing protocol, and species below the zero threshold are overrepresented in the  
972 sediments.

973 Figure 7: MW (left) and BA (right) plots for 12S primer dataset. In both plots, gray represents  
974 features that are abundant, but not differentially abundant; black are rare, but not differentially  
975 abundant. Diagonal dashed lines are shown for zero-intercept with slope of  $\pm 1$ .

976 Figure 8: MW (left) and BA (right) plots for 16S primer dataset. In both plots, gray represents  
977 features that are abundant, but not differentially abundant; black are rare, but not differentially  
978 abundant. Red represents features called as differentially abundant with  $q < 0.1$ . Diagonal dashed  
979 lines are shown for zero-intercept with slope of  $\pm 1$ .

980 Figure 9: Constrained Analysis of Principal Coordinates (CAP) of rarefied A) 12S and B) 16S  
981 primer datasets. Circles are colored by protocol. While there were no discernible differences in  
982 assemblage composition for the 12S primer, in the 16S primer *Guillardia theta* is  
983 overrepresented in the PF protocol in comparison to the NF protocol. *Eucyclogobius newberyii* is  
984 underrepresented in the sediments compared to the filtration protocols, especially the NF  
985 protocol.



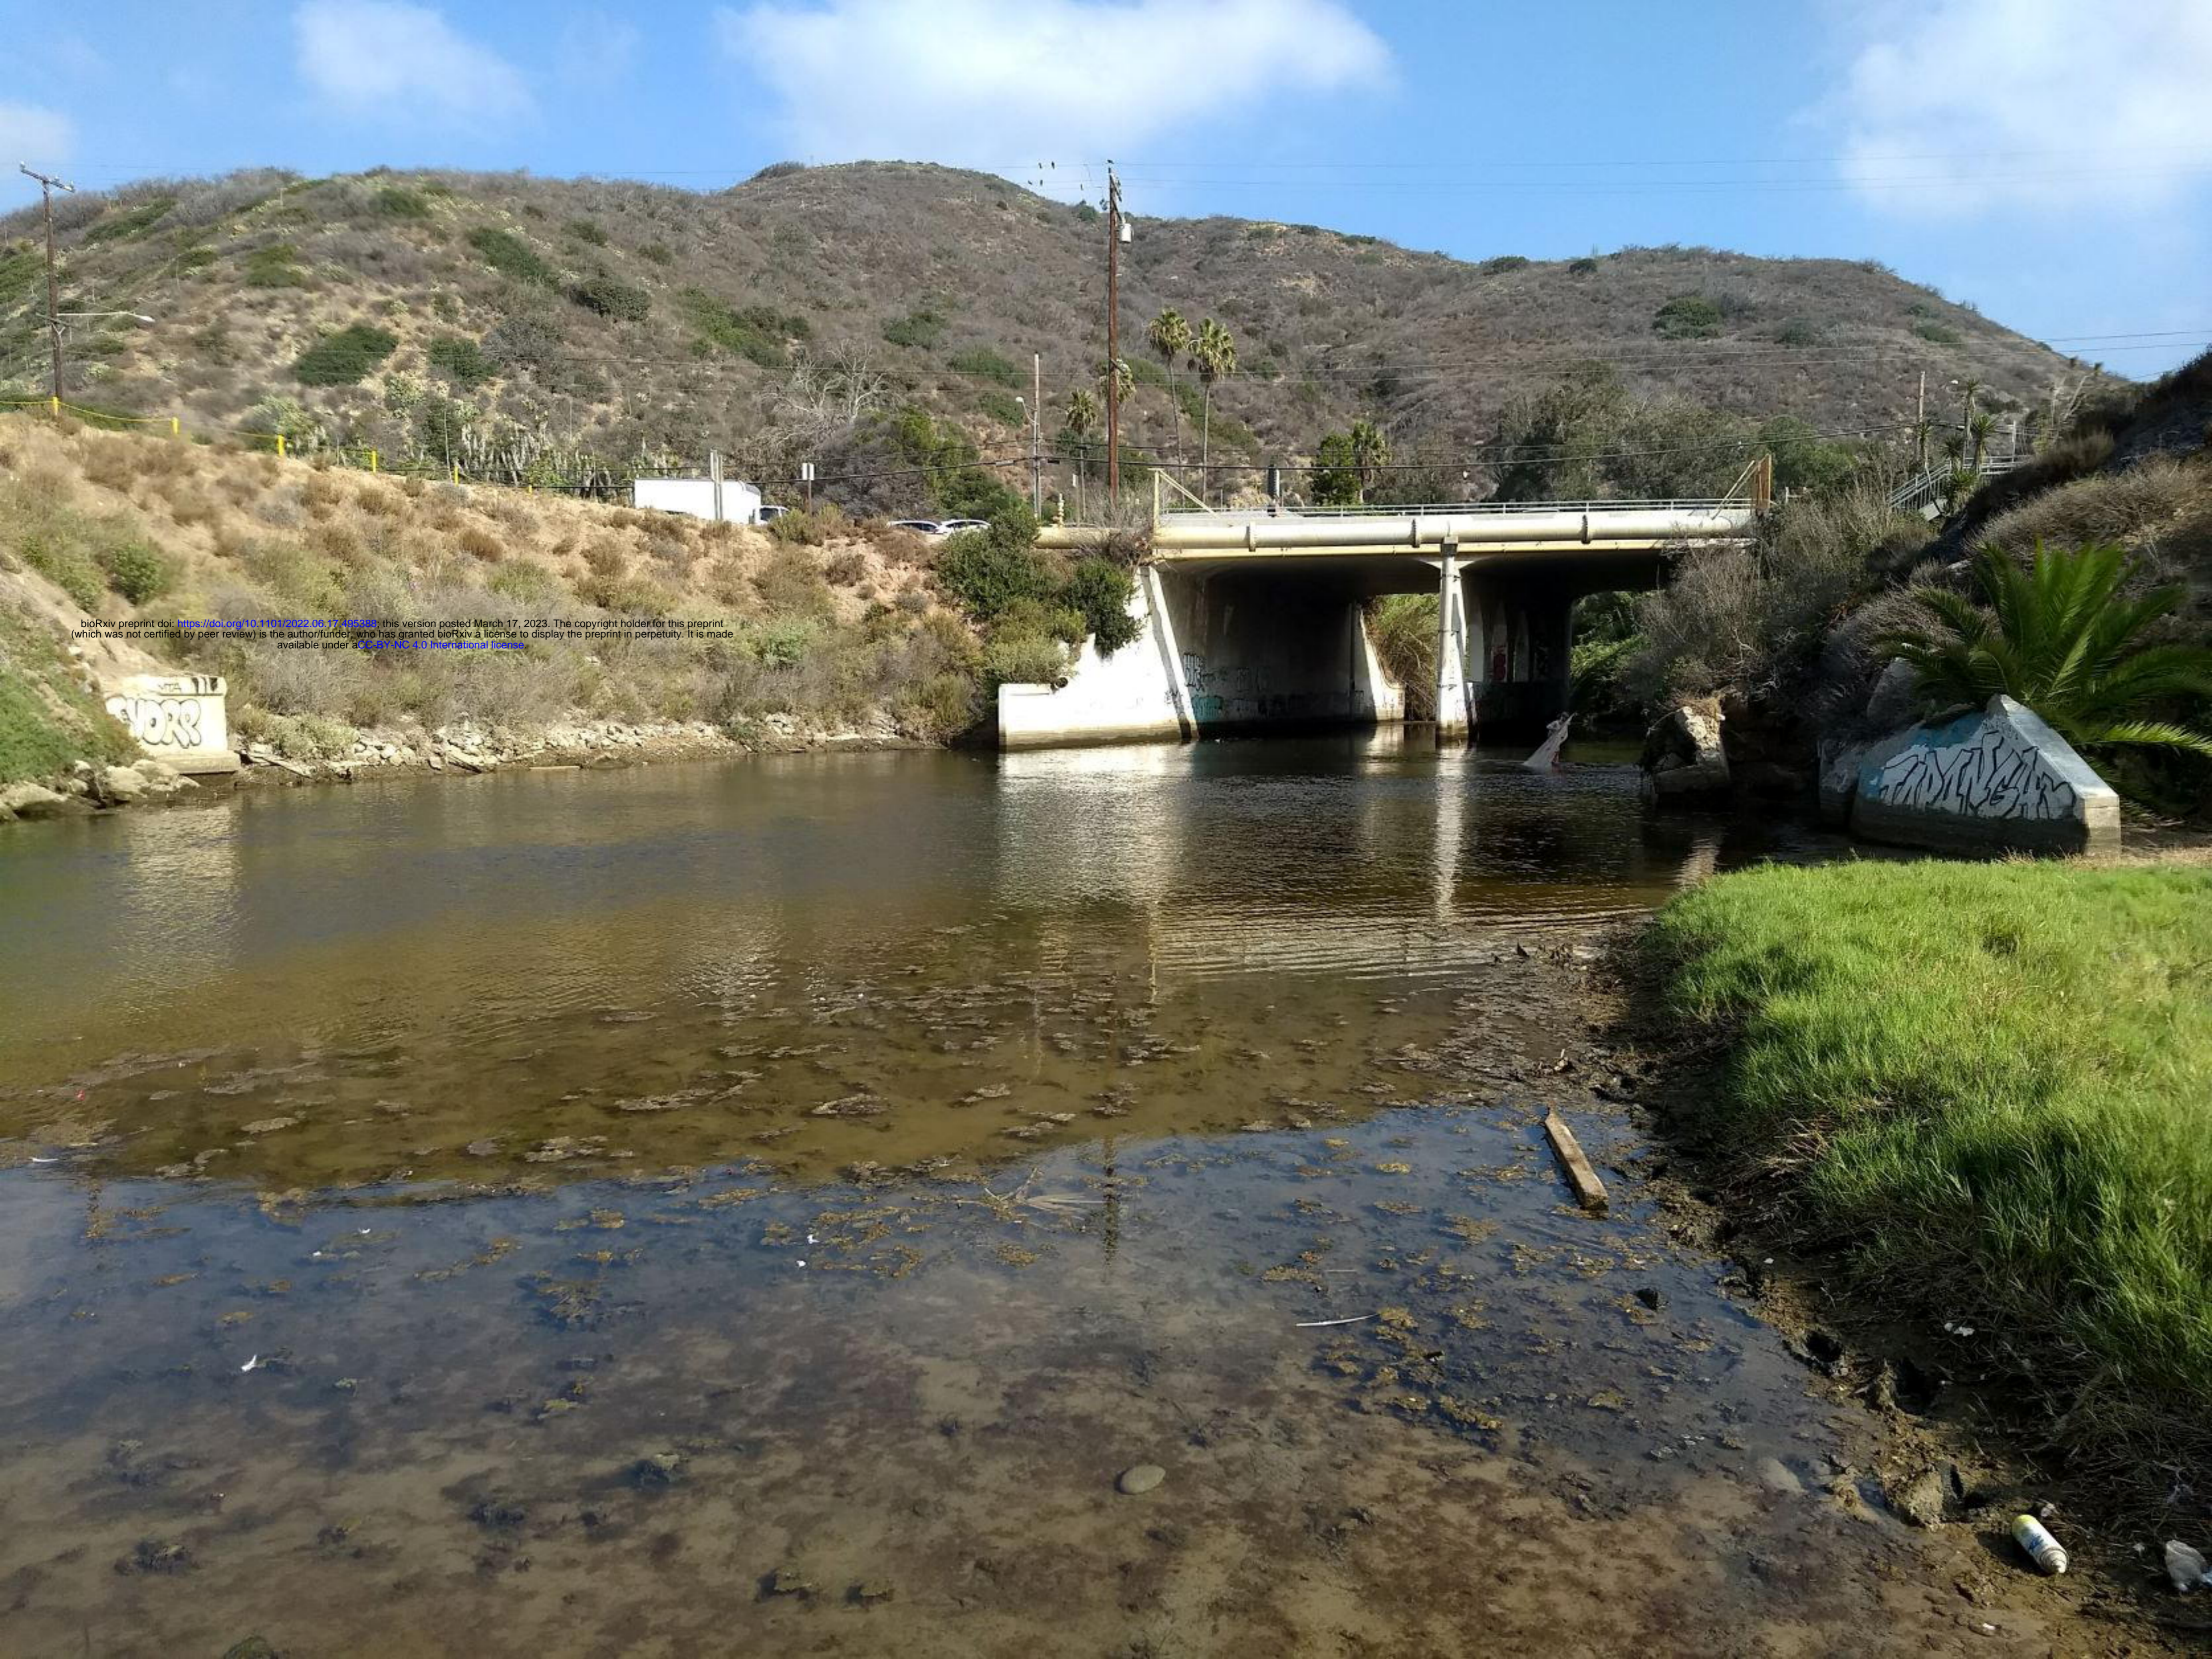

bioRxiv preprint doi: <https://doi.org/10.1101/2022.06.17.495388>; this version posted March 17, 2023. The copyright holder for this preprint (which was not certified by peer review) is the author/funder, who has granted bioRxiv a license to display the preprint in perpetuity. It is made available under aCC-BY-NC 4.0 International license.



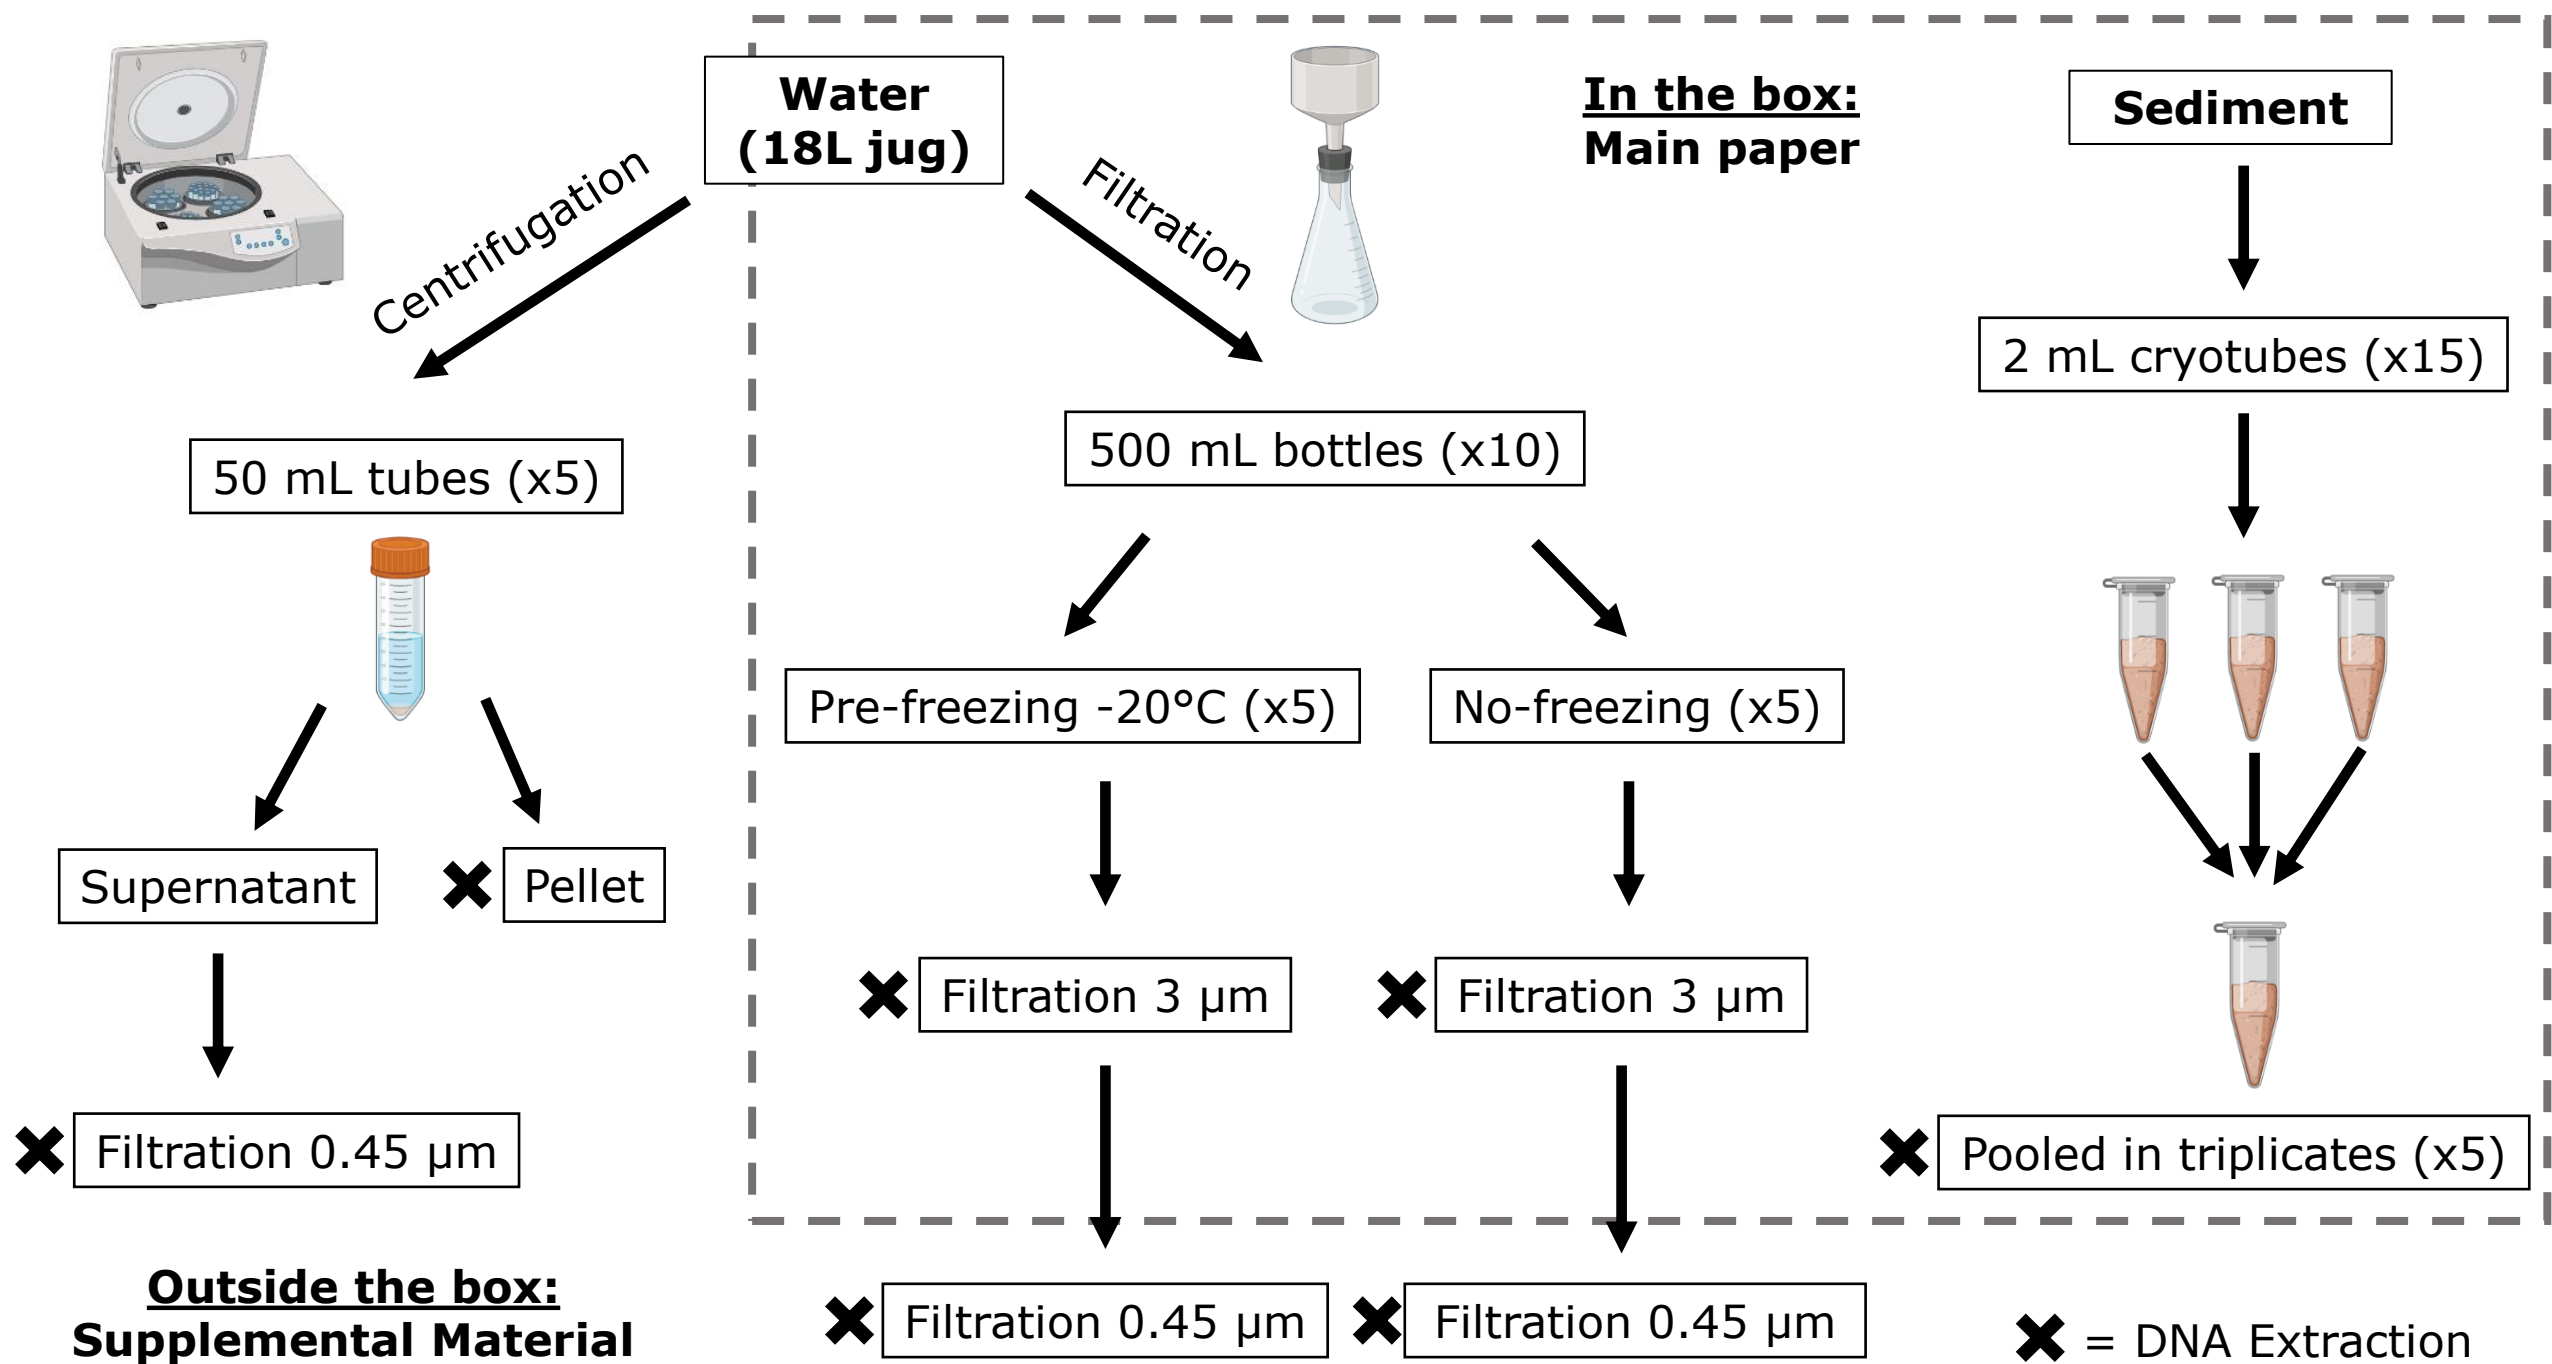

A) 12S

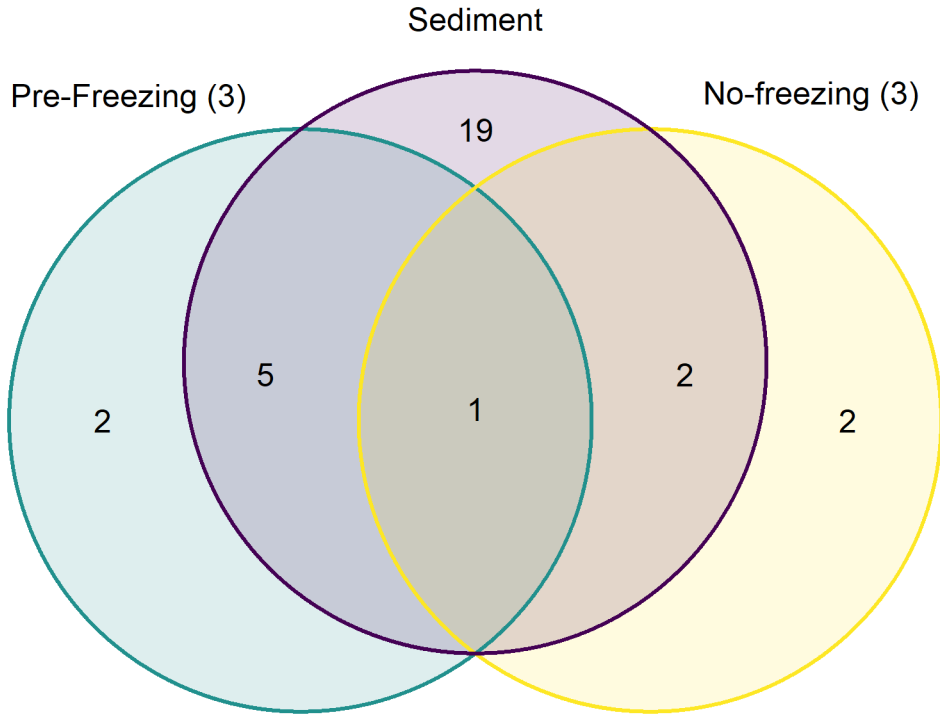

B) 16S

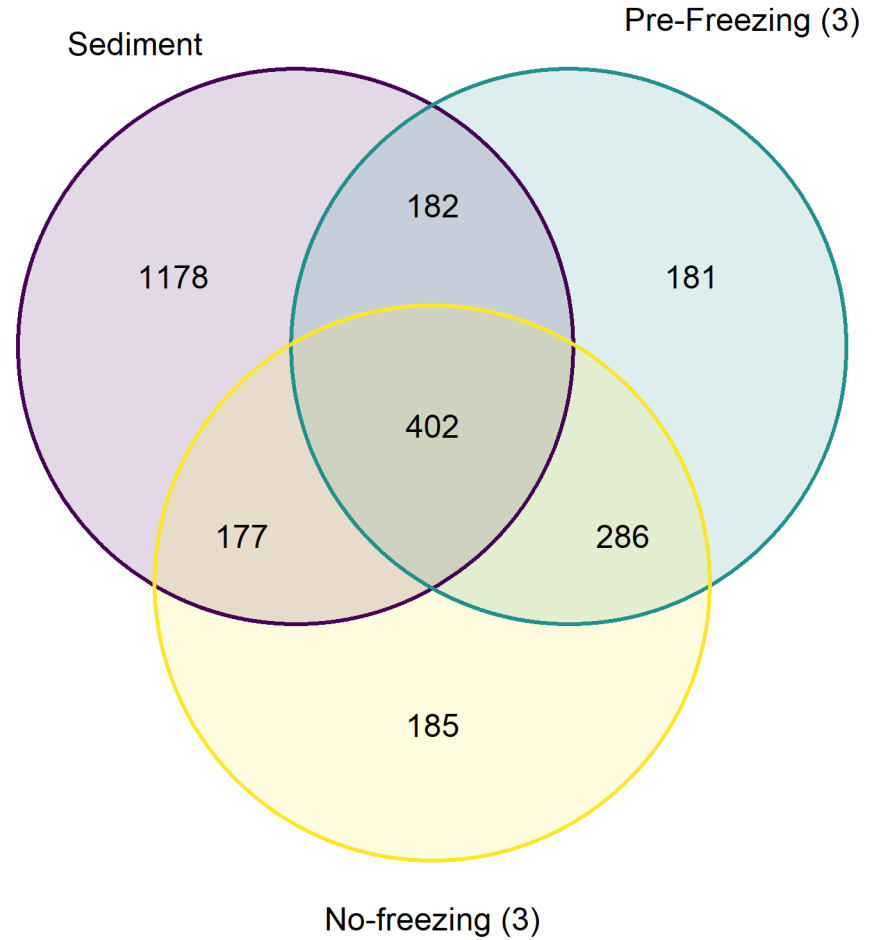

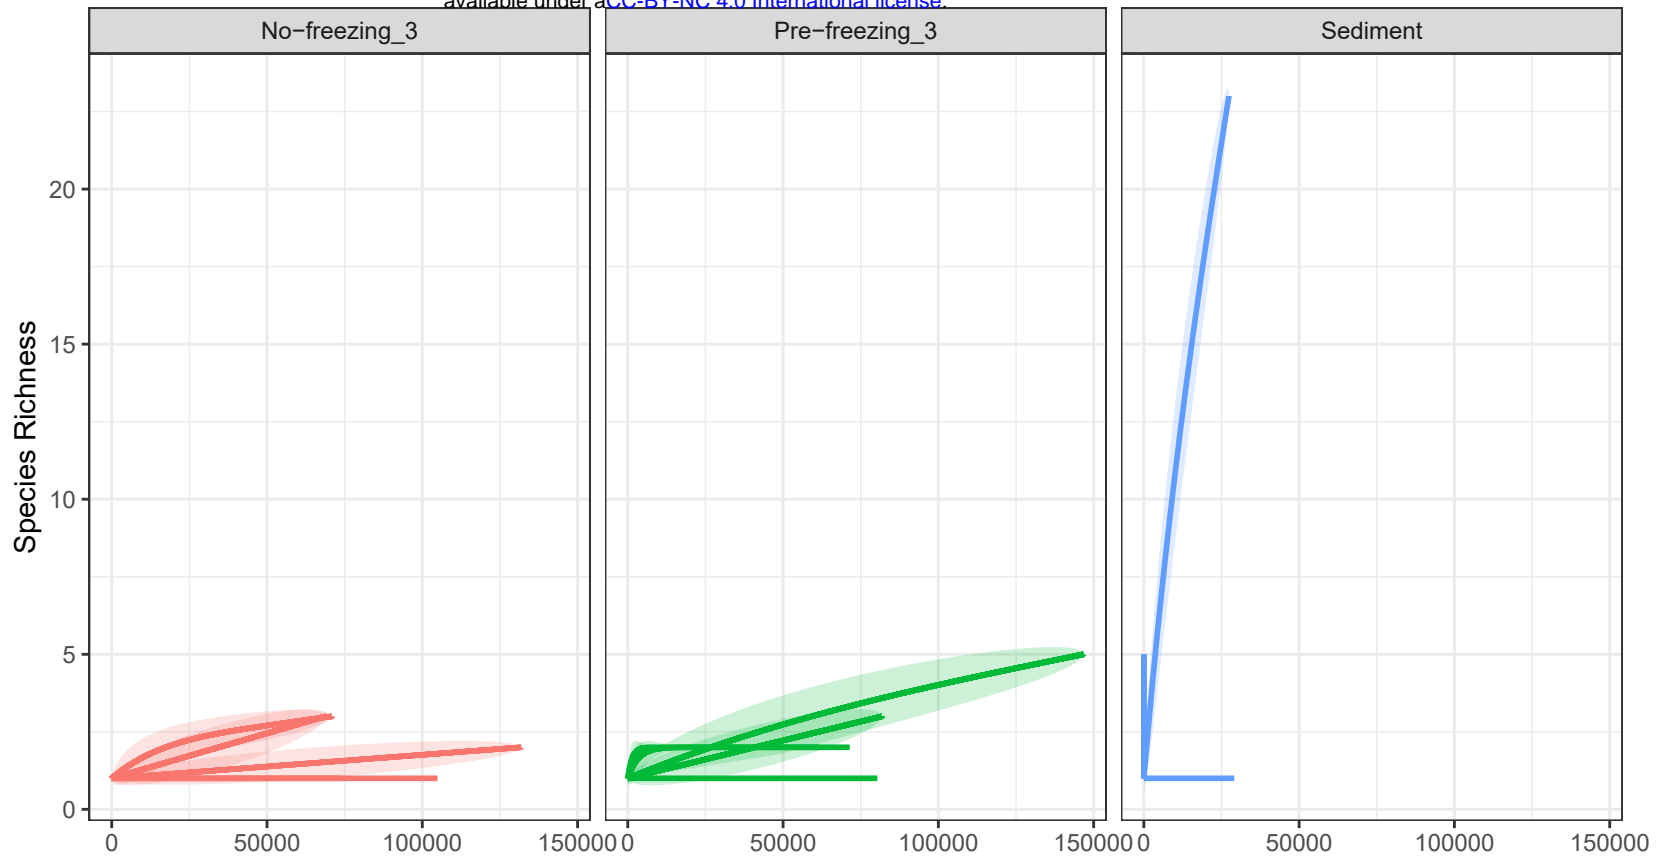

B) 16S

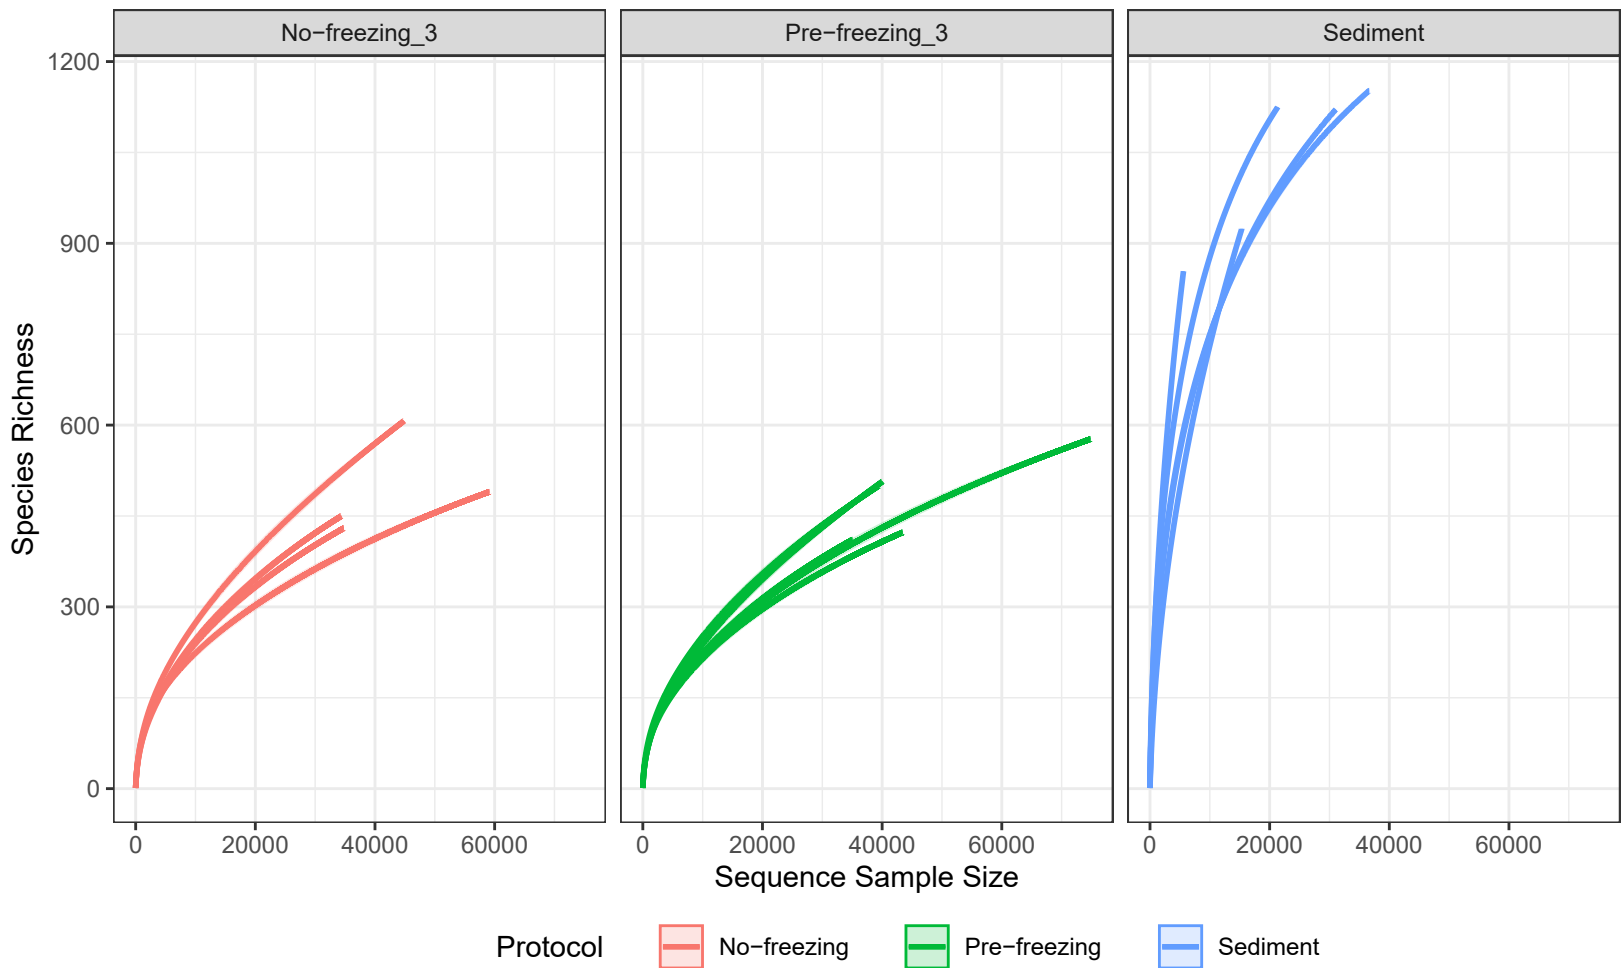

A) 12S

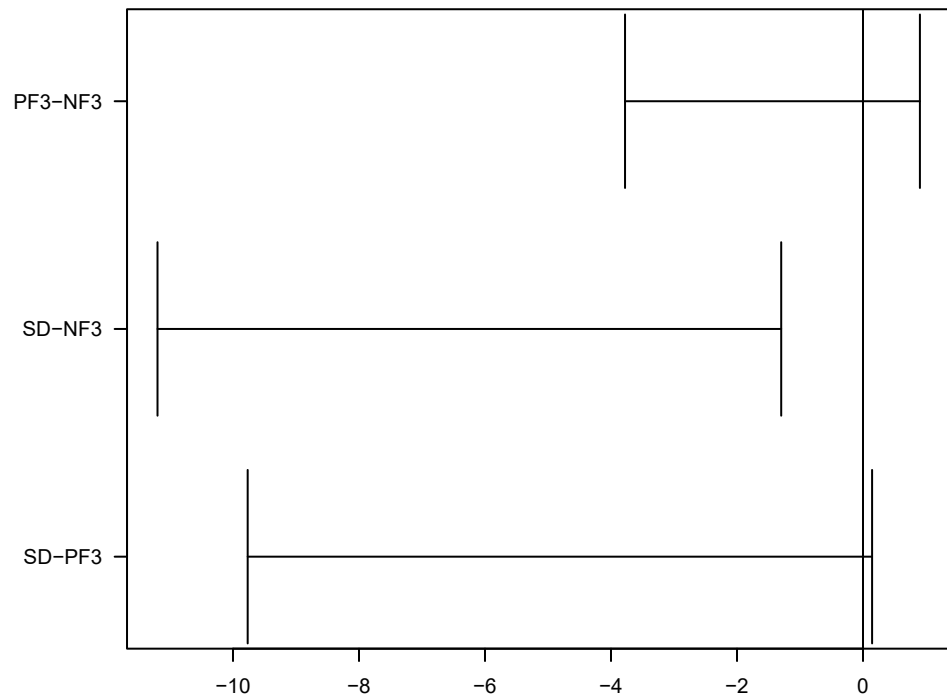

B) 16S

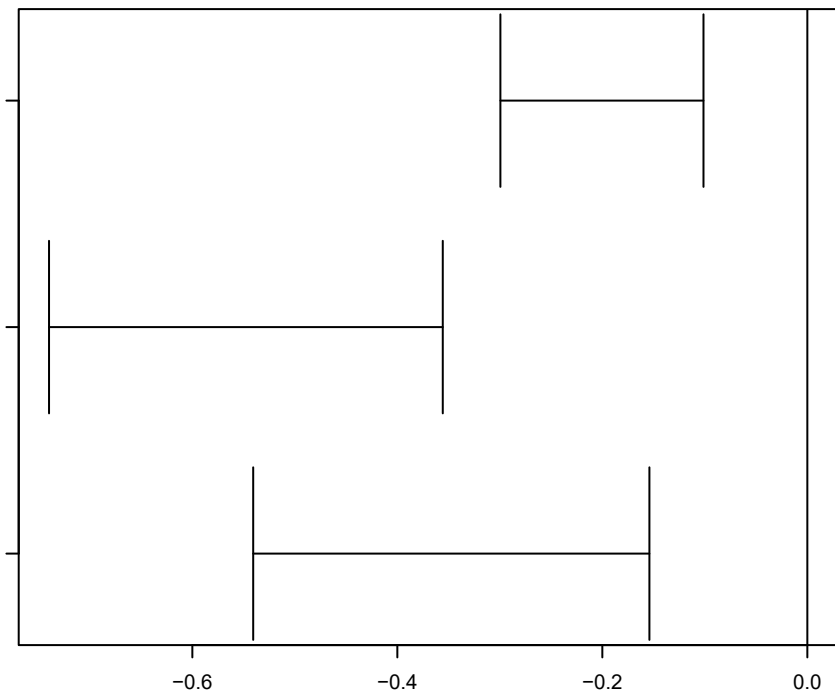

# A) No-freezing Vs Sediment

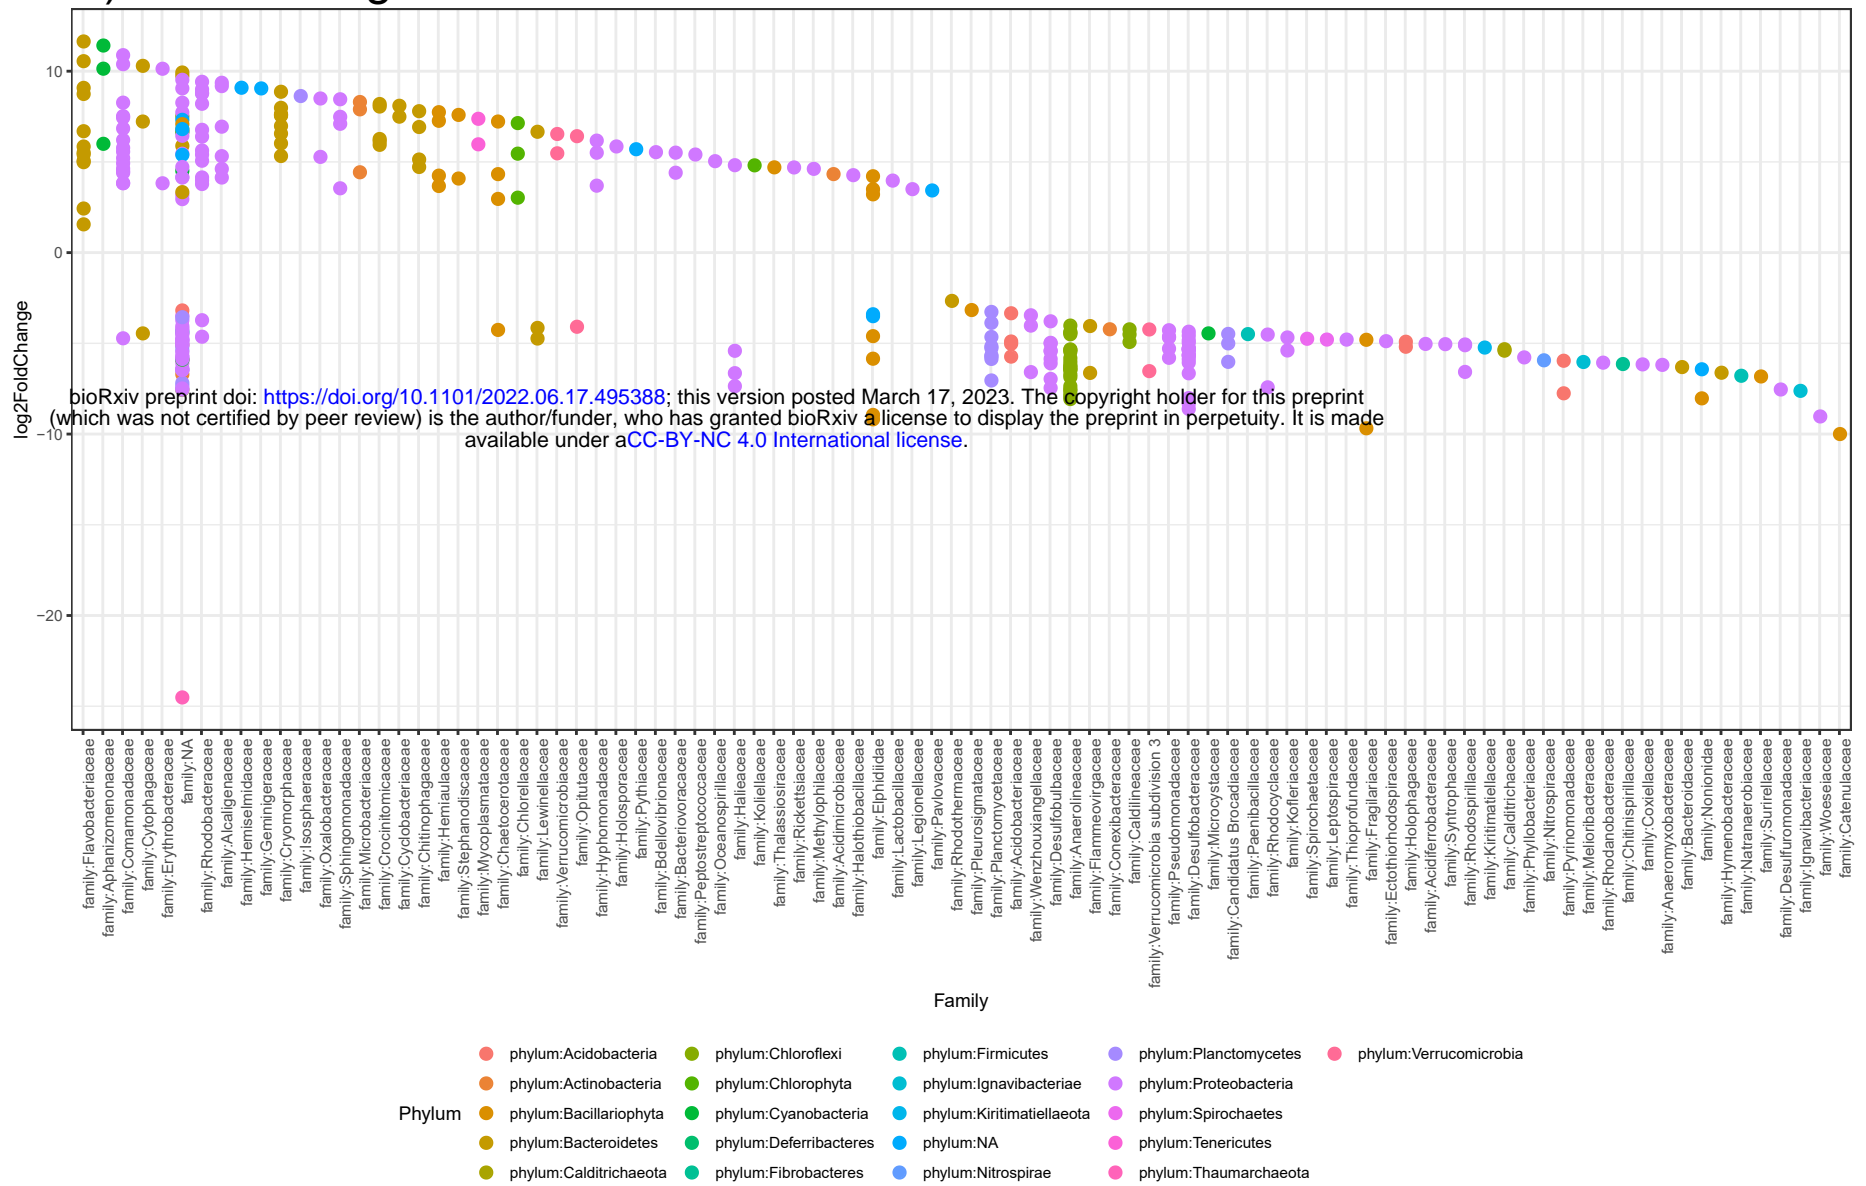

# B) Pre-freezing Vs Sediment

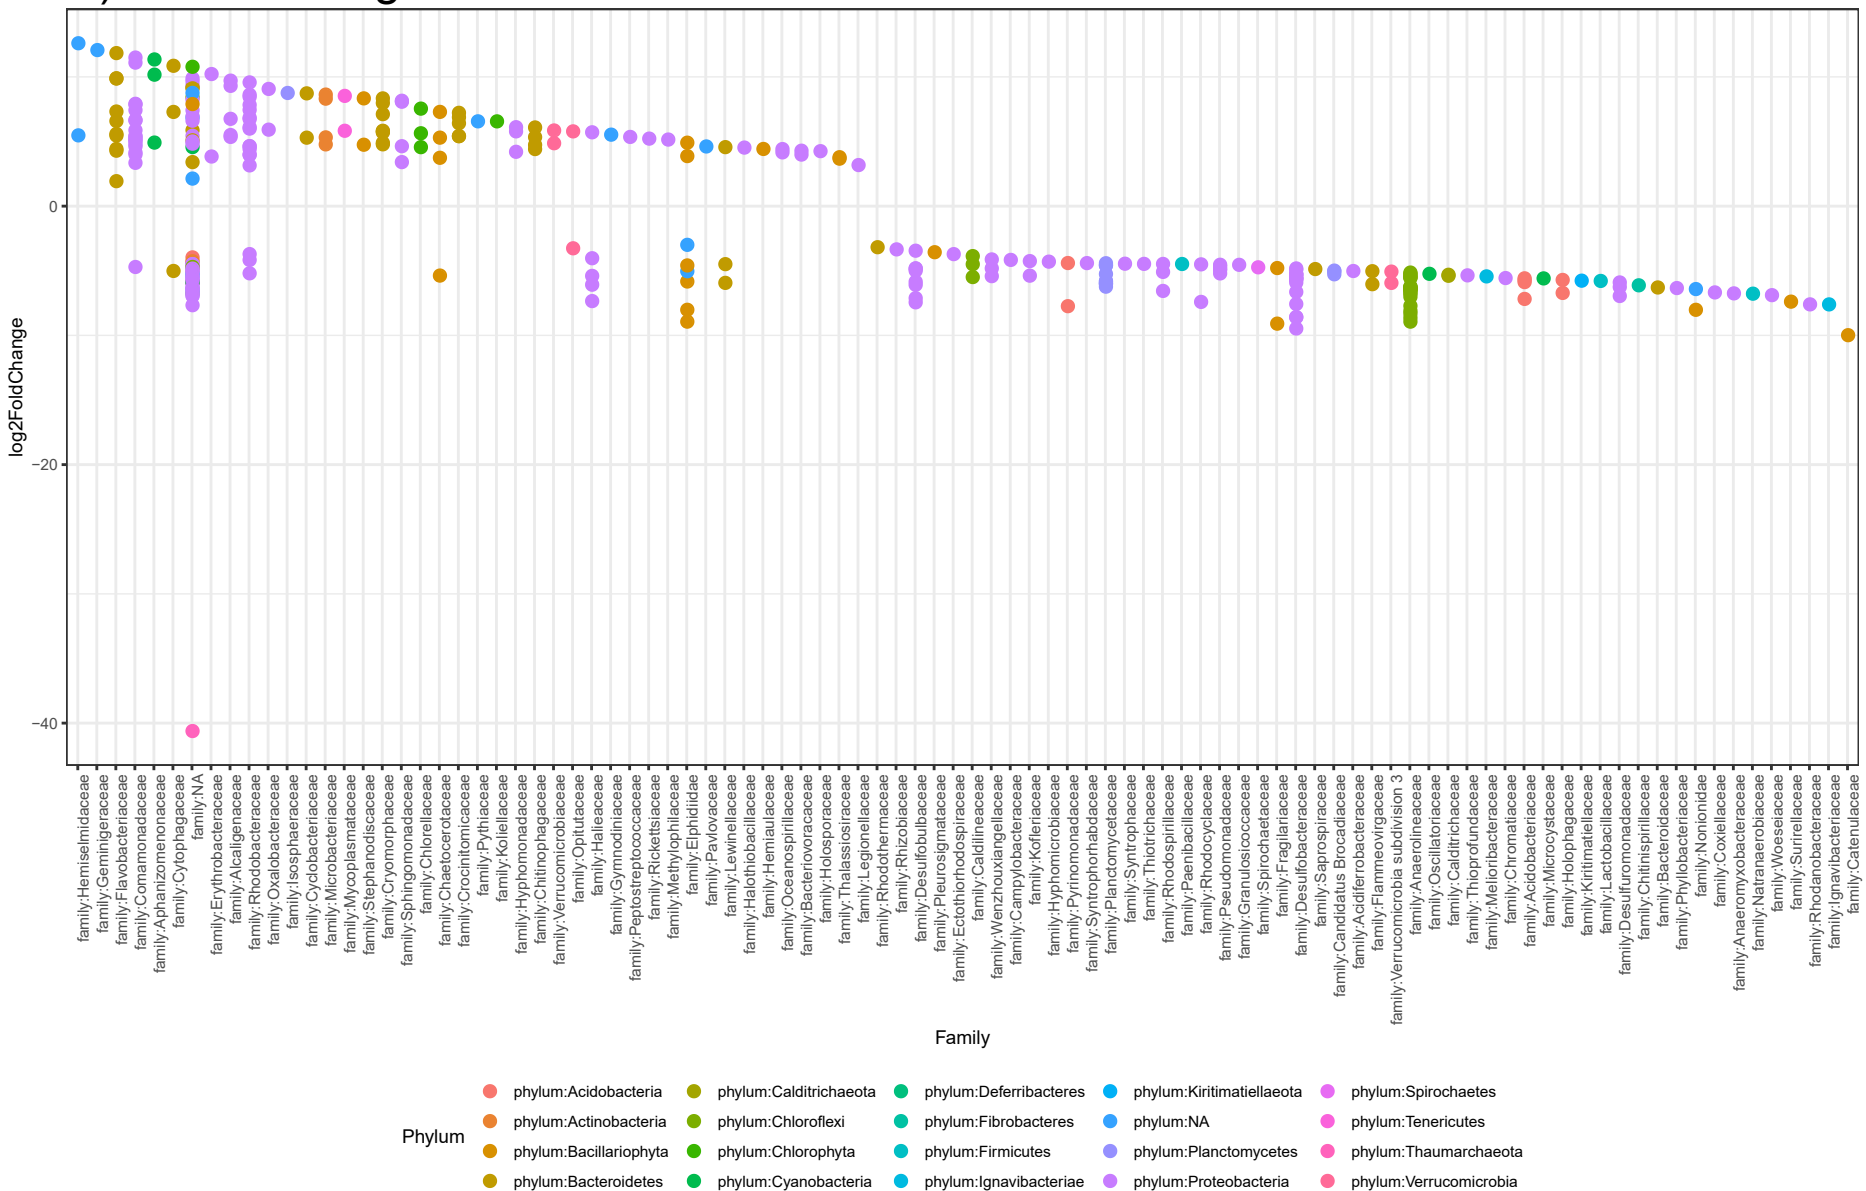



**(Pre Vs No freezing) MW Plot**

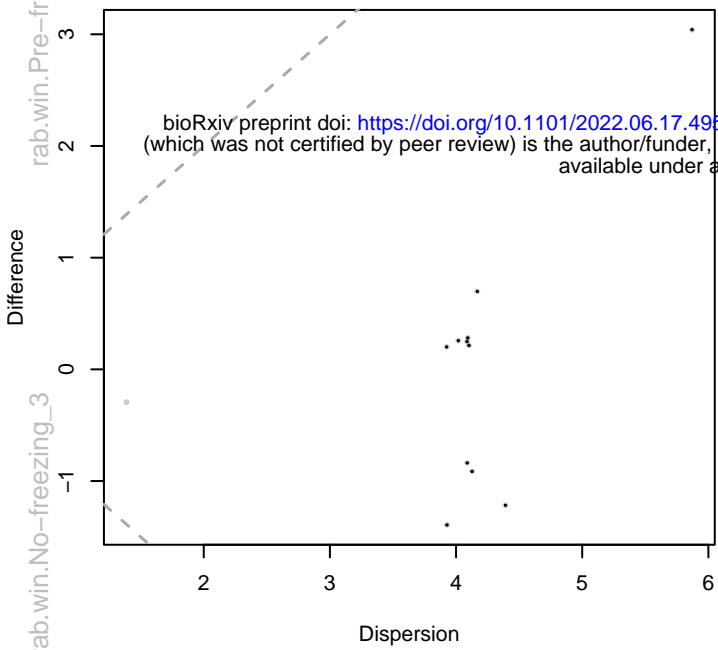

**(Pre Vs No freezing) MA Plot**

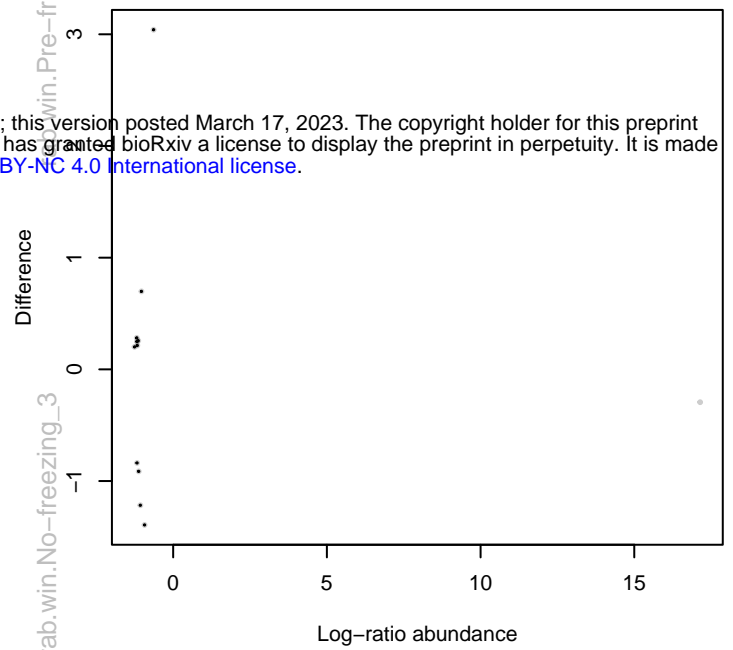

**(No freezing Vs Sediment) MW Plot**

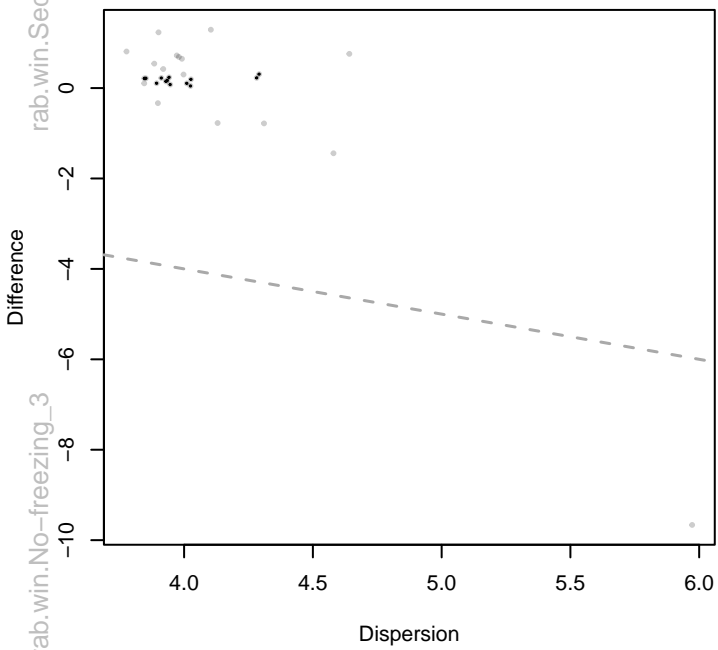

**(No freezing Vs Sediment) MA Plot**

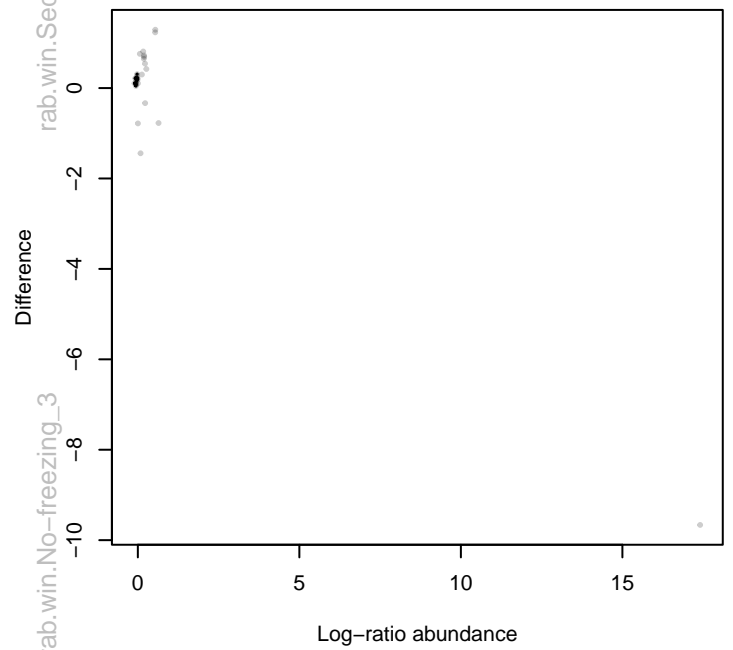

**(Pre-freezing Vs Sediment) MW Plot**

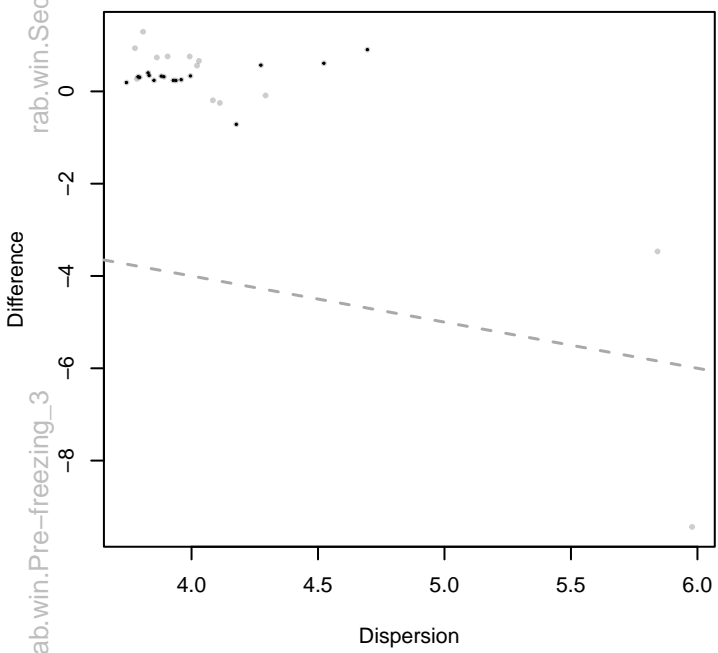

**(Pre-freezing Vs Sediment) MA Plot**

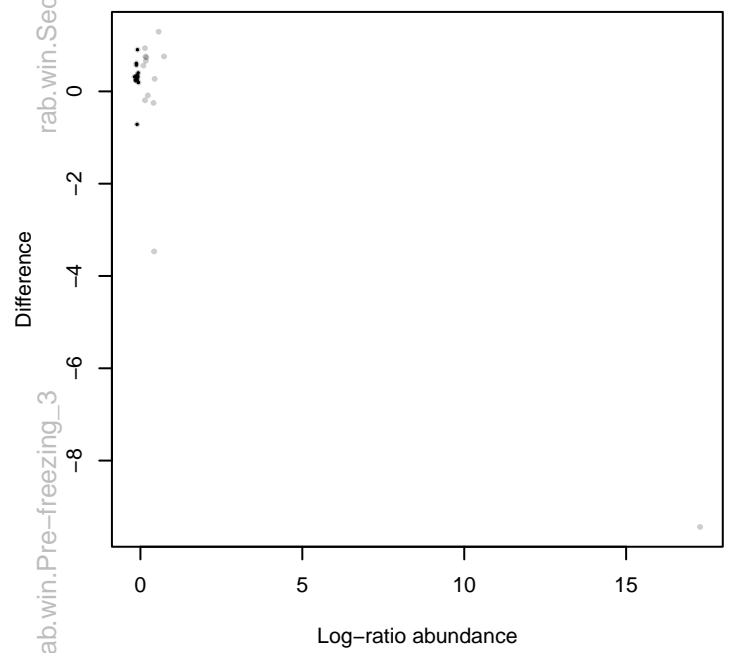

**(Pre Vs No freezing) MW Plot**

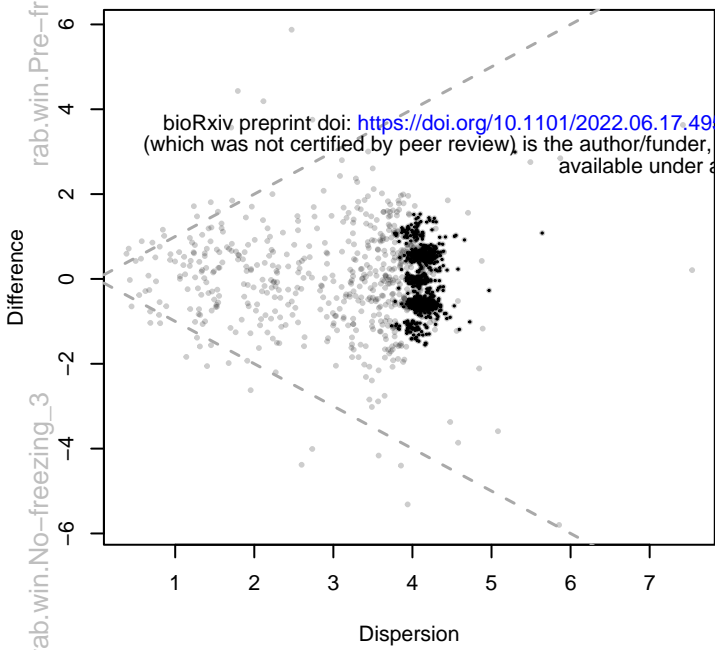

**(Pre Vs No freezing) MA Plot**

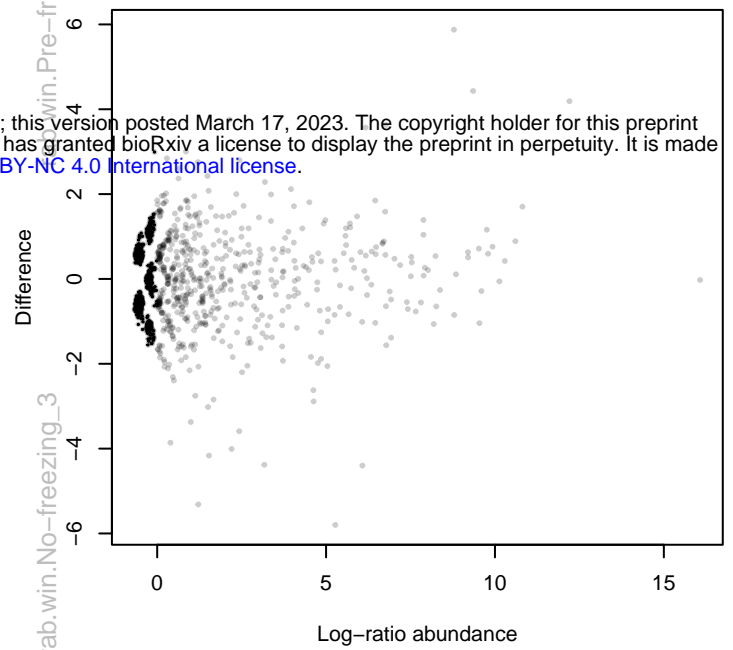

**(No freezing Vs Sediment) MW Plot**

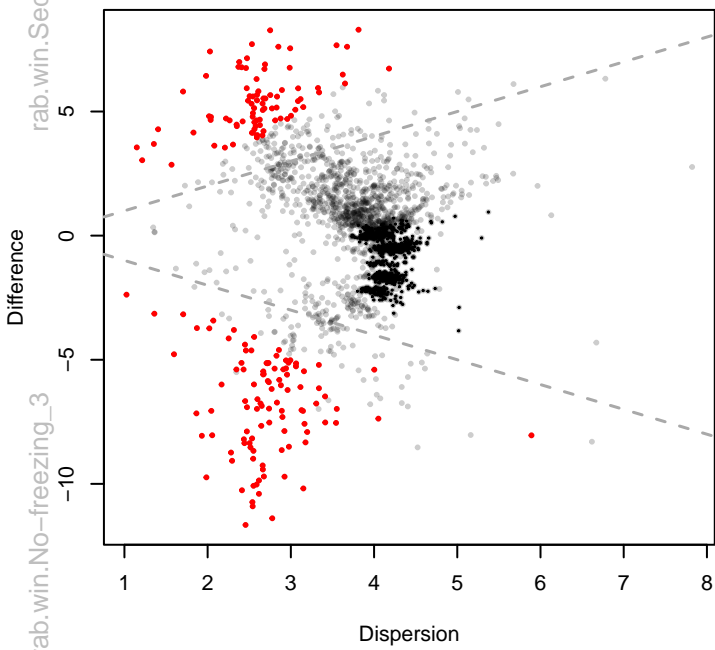

**(No freezing Vs Sediment) MA Plot**

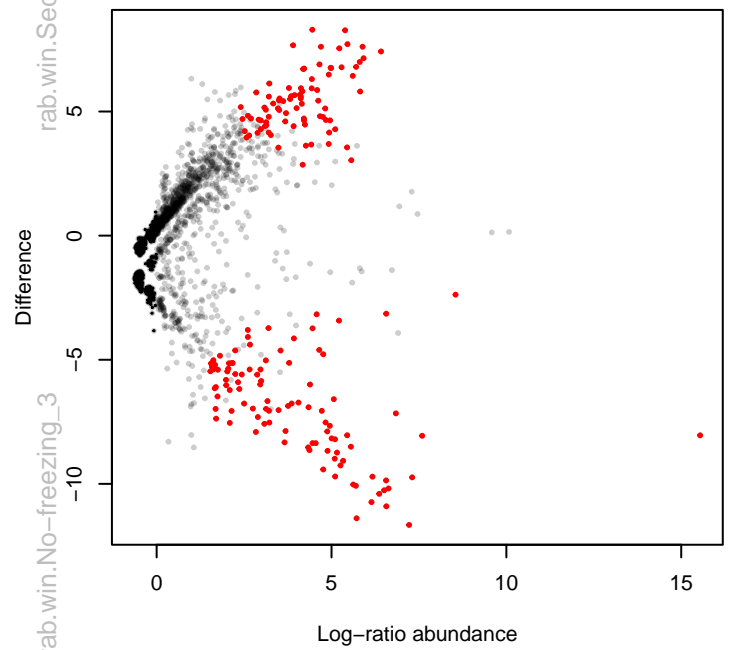

**(Pre-freezing Vs Sediment) MW Plot**

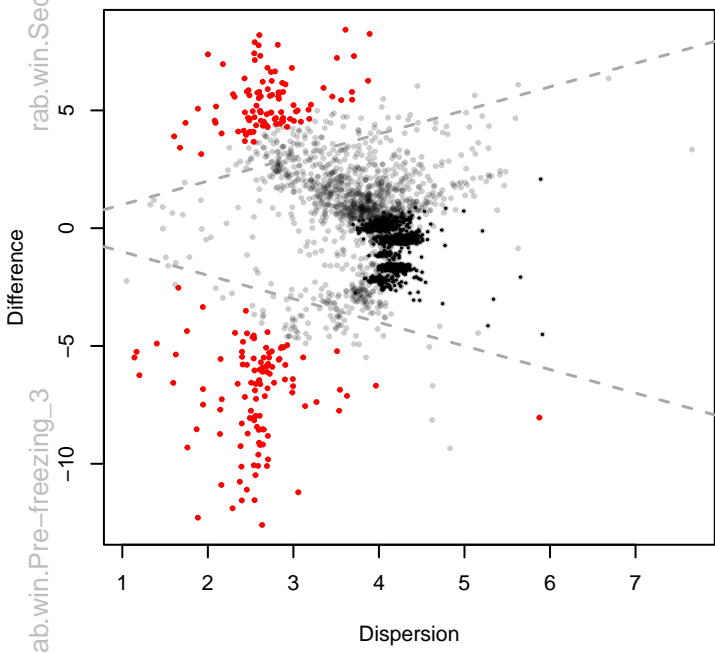

**(Pre-freezing Vs Sediment) MA Plot**

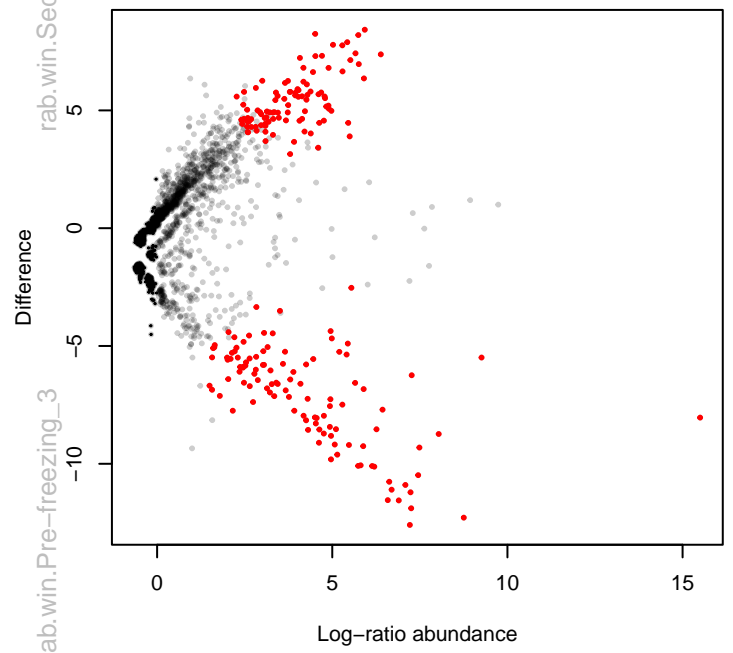

# A) 12S

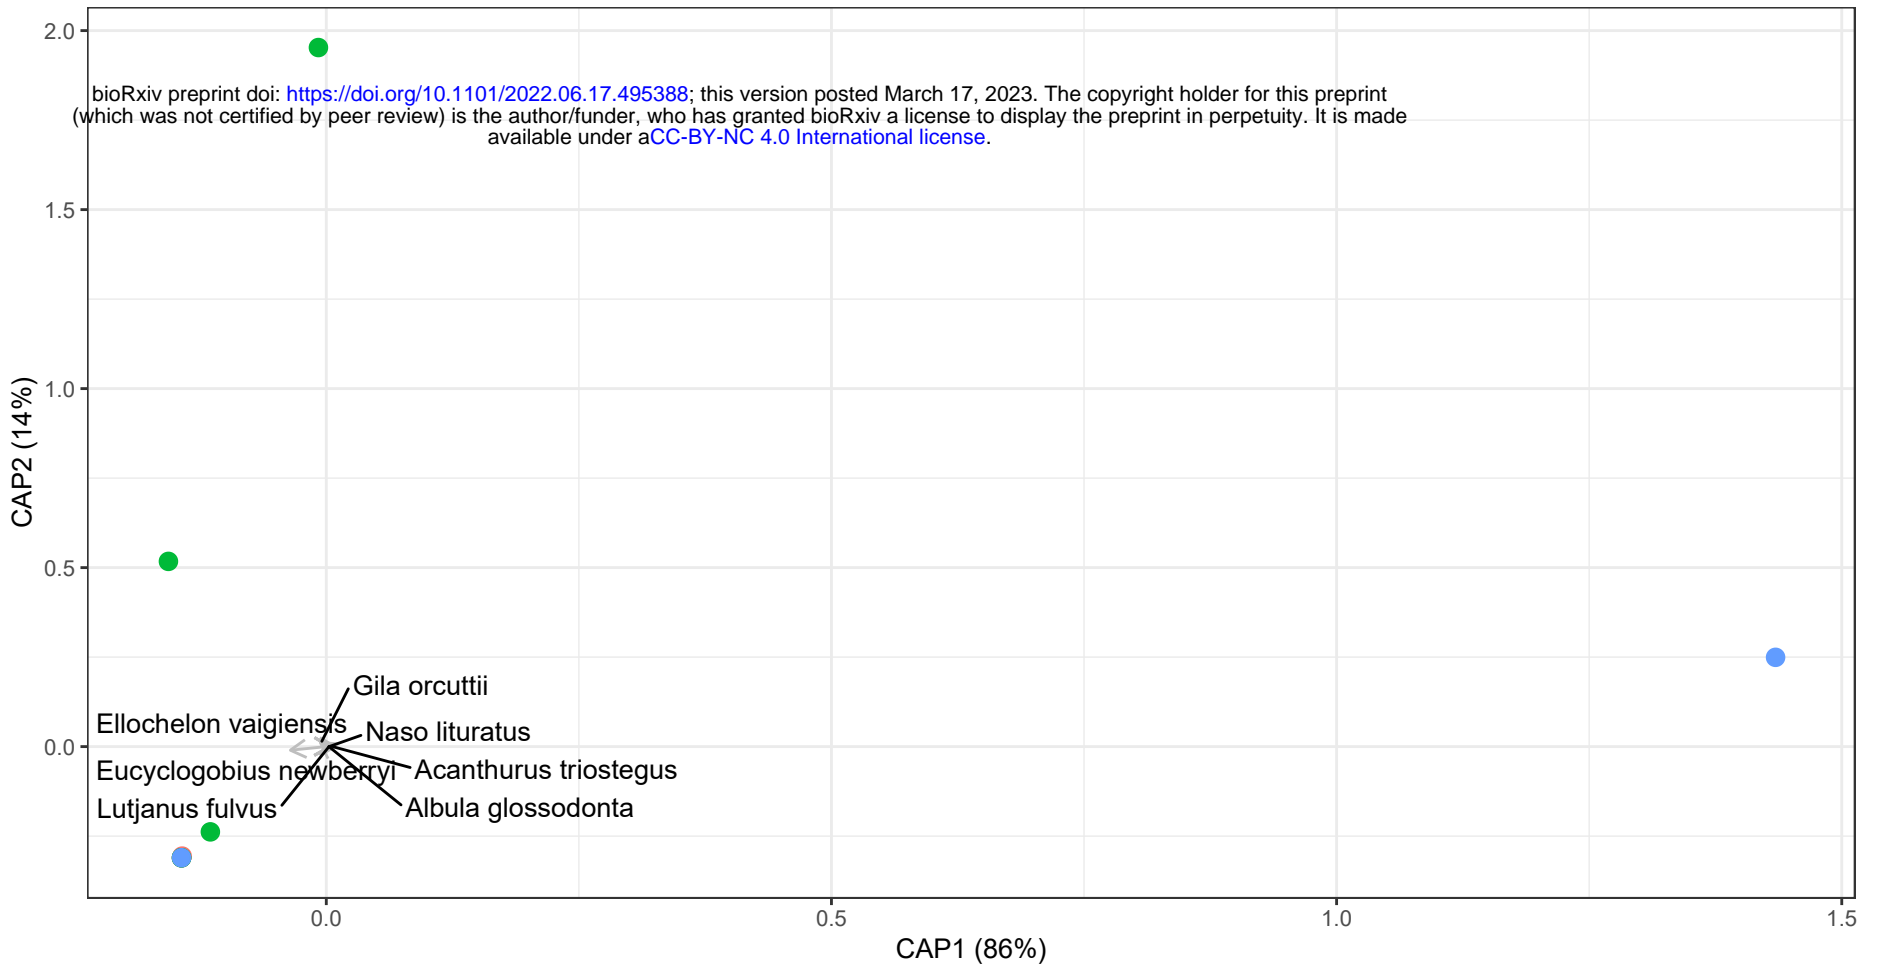

# B) 16S

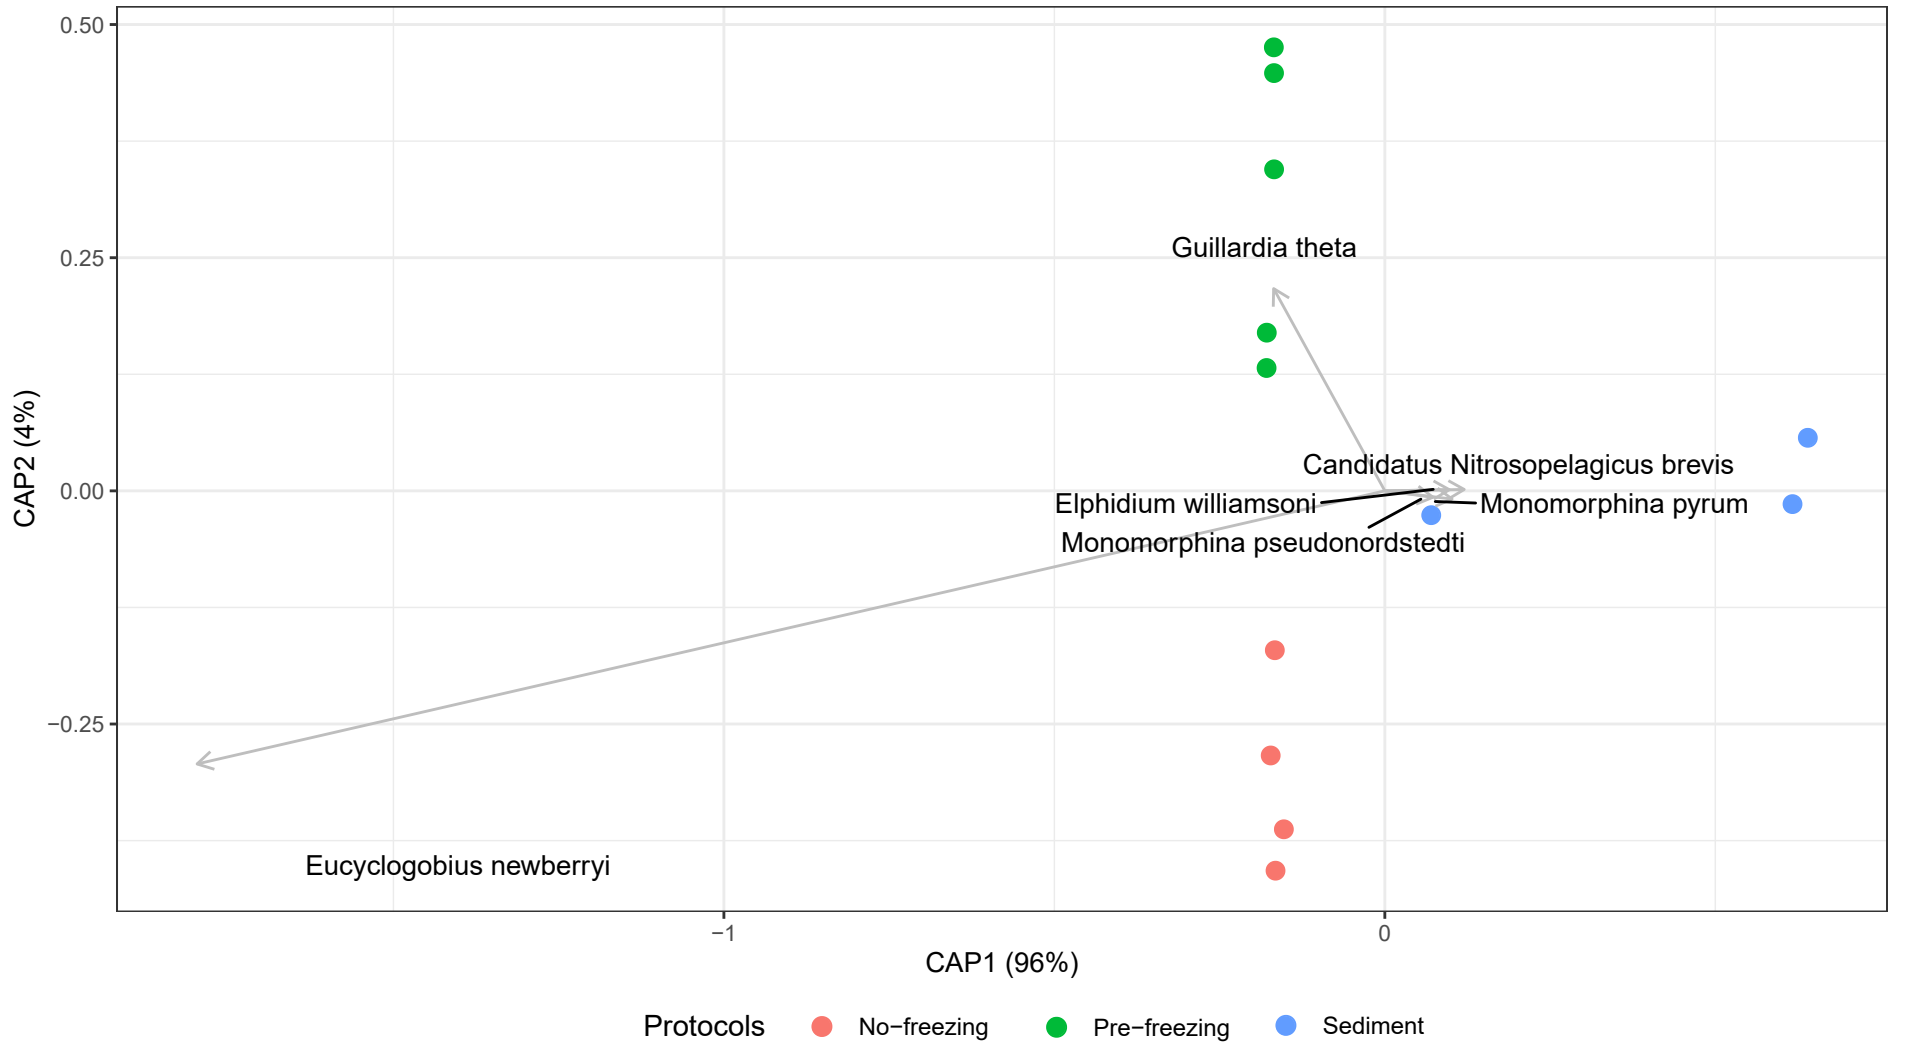

Source: https://www.biorxiv.org/content/10.1101/2022.06.17.495388v3.full.pdf
